# Supplementary material for: Using 3-D blueprints at a construction site
Source: Royal Society of Chemistry journal article supplement (doi:10.1039/c5cp01993a), 2013-01-01
Supplement: c5cp01993a1.pdf [file c5cp01993a1.pdf]

# Interplay of Donor-acceptor Interactions in Stabilizing Boron Nitride Compounds: Insights from Theory

Mohammad R. Momeni, Lisa Shulman, Eric Rivard,\* and Alex Brown\*

*Department of Chemistry, University of Alberta, Edmonton, Alberta, T6G 2G2 Canada*

E-mail: erivard@ualberta.ca; alex.brown@ualberta.ca

## Isolated (BN)<sub>n</sub> (n = 1–3) Molecules

Isolated BN is a challenging system as the lowest singlet and triplet states both have multi-reference character and are nearly isoenergetic;<sup>1–3</sup> the triplet state has been determined experimentally to be more stable by  $0.71 \pm 0.09$  kcal/mol.<sup>4,5</sup> The M05-2X/cc-pVTZ singlet-triplet gap is overestimated at 21.7 kcal/mol (with the triplet state as more stable) but this is in keeping with most DFT methods and also many ab initio approaches. However, the present work is focused on electronic and structural characterization of the singlet complexes rather than relative singlet-triplet energetics of the isolated species. For example, our computed M05-2X/cc-pVTZ bond lengths in the triplet and singlet states (1.315 Å and 1.261 Å, respectively) agree well with high-level CCSD(T)/aug-cc-pVQZ results of 1.329 Å and 1.270 Å.

Xu *et al.* have previously studied the singlet and triplet potential energy surfaces (PESs) of linear and cyclic B<sub>2</sub>N<sub>2</sub> isomers by means of the coupled cluster CCSD method with the

---

\*To whom correspondence should be addressed

---

aug-cc-pVTZ basis set.<sup>6</sup> Cui *et al.* have recently examined the B<sub>2</sub>N<sub>2</sub> isomers with CCSD(T) single point computations based on DFT geometries.<sup>7</sup> We will compare our results to the energies and geometries determined by Xu *et al.* as the relative stability of the linear isomers is strongly dependent on the electronic structure method used.<sup>7-10</sup> For all the B<sub>2</sub>N<sub>2</sub> isomers studied, the triplet states were found to be more stable than their corresponding singlet electronic arrangements; cyclic B<sub>2</sub>N<sub>2</sub> and linear BNB in their triplet states being the two lowest energy structures and nearly isoenergetic.<sup>6,7</sup> Cyclic B<sub>2</sub>N<sub>2</sub> and linear BNB will be the two B<sub>2</sub>N<sub>2</sub> isomers considered in our study, where upon complexation they undergo spin-forbidden process to form the singlet complex. On the triplet PES, the cyclic isomer is 1.0 kcal/mol (-0.3 kcal/mol) more stable than the linear form at the M05-2X/cc-pVTZ (CCSD/aug-cc-pVTZ) level of theory. On the singlet PES, the cyclic planar four-membered ring with *D*<sub>2h</sub> symmetry is most stable and the linear *C*<sub>∞v</sub> symmetric BNB molecule is 25.1 kcal/mol higher in energy. The linear isomer with BNB connectivity is 14.7, 20.9, and 46.6 kcal/mol more stable than the BNB, NBN, and BNB isomers, respectively. They also concluded on the basis of short transannular B-B distances that a B-B bond exists within the singlet B<sub>2</sub>N<sub>2</sub> heterocycle. Overall, our M05-2X/cc-pVTZ optimized geometries of linear BNB and the *D*<sub>2h</sub> symmetric B<sub>2</sub>N<sub>2</sub> rings are in reasonable agreement with the CCSD geometries determined by Xu *et al.* (Figure S1). However, singlet BNB was found to adopt *C*<sub>s</sub> symmetry as a global minimum instead of the reported *C*<sub>∞v</sub> symmetry, with the former geometry being 6.3 kcal/mol more stable than the latter at the M05-2X/cc-pVTZ level of theory. The calculated B-N bond lengths of the BNB isomer at the M05-2X/cc-pVTZ level of theory (CCSD/aug-cc-pVTZ values in parentheses), with *C*<sub>s</sub> (*C*<sub>∞v</sub>) symmetries, are 1.339 (1.397), 1.318 (1.289), and 1.332 (1.381) Å, respectively. The corresponding B-N bonds within the cyclic isomer B<sub>2</sub>N<sub>2</sub> are each 1.392 (1.403) Å with a computed cross-ring B...B distance of 1.483 (1.491) Å. Additionally, the computed singlet-triplet gap ( $\Delta E_{S-T}$ ) value for the B<sub>2</sub>N<sub>2</sub> molecule at the CCSD/aug-cc-pVTZ (20.0 kcal/mol) level of theory compares well with the  $\Delta E_{S-T}$  value of 13.2 kcal/mol obtained using M05-2X/cc-pVTZ; the corresponding

M05-2X (CCSD)  $\Delta E_{S-T}$  values for the BNBN molecule are 40.1 (46.6) kcal/mol.

For  $B_3N_3$ , only the singlet isomer has been considered as all other isomers (regardless of spin-state) are significantly higher in energy;<sup>8,11</sup> for example, linear BNBNBN in its triplet state is 75.2 kcal/mol higher in energy than the cyclic isomer in its singlet state at the CCSD(T)/cc-pVDZ level of theory.<sup>11</sup> The B–N bond lengths in  $B_3N_3$  are determined in the present M05-2X/cc-pVTZ study to be 1.354 Å; this is within 0.03 Å of the 1.3763 Å computed by Martin *et al.*<sup>11</sup> at the CCSD(T)/cc-pVDZ level of theory. The M05-2X/cc-pVTZ computed B–N bond lengths in singlet cyclo- $B_3N_3$  decrease on average by 0.038 Å in relation to the intraring B–N distances in singlet cyclo- $B_2N_2$ ; this suggests a greater degree of B–N intraring resonance stabilization within  $B_3N_3$  in relation to the  $B_2N_2$ , as later determined by NICS computations (see Table S1).

Overall, the optimized M05-2X/cc-pVTZ geometries and relative energies of the isolated  $(BN)_n$  ( $n = 1 - 3$ ) are in good agreement with available coupled cluster data, and hence we chose to conduct the remaining computations using the M05-2X/cc-pVTZ level of theory.

## Comparison of M05-2X/cc-pVTZ and BP86/TZ2P Geometries

BP86/TZ2P optimized geometries show slightly (0.003-0.009 Å) shorter C–B and longer (0.001-0.029 Å) carbene attached B–N bonds compared to the geometries obtained by M05-2X. In the  $ImMe_2CH_2$  and  $Me_3PCH_2$  substituted adducts, the C–B and B–N bonds determined using BP86/TZ2P are 0.002-0.016 Å and 0.007-0.020 Å longer, respectively, than those determined using M05-2X/cc-pVTZ. Except in the case of the  $ImMe_2CH_2 \cdot BNBN$  and  $ImMe_2CH_2 \cdot B_3N_3$  adducts, all the other BP86 optimized C- $CH_2$  and P- $CH_2$  ylidic bonds are 0.007-0.015 Å longer than the bond lengths obtained via M05-2X (coordinates of all optimized structures are presented in Tables S10 and S11).

Table S1: Calculated NICS Values of the B<sub>2</sub>N<sub>2</sub> and B<sub>3</sub>N<sub>3</sub> Rings of the Studied Complexes at the M05-2X/cc-pVTZ Level of Theory. The Corresponding Values Are Computed for Benzene (C<sub>6</sub>H<sub>6</sub>) and Cyclobutadiene (C<sub>2</sub>H<sub>4</sub>) as Aromatic and Anti-aromatic Molecules, Respectively.

| Species                                                                          | NICS (0.0) | NICS (0.0) <sub>zz</sub> | NICS (1.0) | NICS (1.0) <sub>zz</sub> |
|----------------------------------------------------------------------------------|------------|--------------------------|------------|--------------------------|
| B <sub>2</sub> N <sub>2</sub>                                                    | -44.50     | -73.09                   | -6.28      | -15.12                   |
| B <sub>3</sub> N <sub>3</sub>                                                    | -9.88      | -7.04                    | -2.64      | -6.51                    |
| C <sub>2</sub> H <sub>4</sub>                                                    | +33.58     | +127.38                  | +20.85     | +65.77                   |
| C <sub>6</sub> H <sub>6</sub>                                                    | -7.41      | -16.09                   | -10.56     | -31.06                   |
| ImMe <sub>2</sub> ·B <sub>2</sub> N <sub>2</sub>                                 | -11.03     | -12.79                   | +1.29      | +8.46                    |
| (ImMe <sub>2</sub> ) <sub>2</sub> ·B <sub>2</sub> N <sub>2</sub>                 | +6.06      | +36.05                   | +5.13      | +13.74                   |
| ImMe <sub>2</sub> ·B <sub>3</sub> N <sub>3</sub>                                 | -6.24      | +1.02                    | -3.52      | -7.43                    |
| (ImMe <sub>2</sub> ) <sub>2</sub> ·B <sub>3</sub> N <sub>3</sub>                 | -3.61      | +2.42                    | -3.92      | -8.55                    |
| (ImMe <sub>2</sub> ) <sub>3</sub> ·B <sub>3</sub> N <sub>3</sub>                 | -1.02      | -4.96                    | -3.97      | -2.02                    |
| ImMe <sub>2</sub> CH <sub>2</sub> ·B <sub>2</sub> N <sub>2</sub>                 | -12.82     | +25.83                   | +0.47      | +8.60                    |
| (ImMe <sub>2</sub> CH <sub>2</sub> ) <sub>2</sub> ·B <sub>2</sub> N <sub>2</sub> | +4.42      | +22.52                   | +3.06      | +9.04                    |
| ImMe <sub>2</sub> CH <sub>2</sub> ·B <sub>3</sub> N <sub>3</sub>                 | -5.67      | -11.08                   | -3.12      | -0.20                    |
| (ImMe <sub>2</sub> CH <sub>2</sub> ) <sub>2</sub> ·B <sub>3</sub> N <sub>3</sub> | -3.56      | +1.50                    | -3.87      | -3.19                    |
| (ImMe <sub>2</sub> CH <sub>2</sub> ) <sub>3</sub> ·B <sub>3</sub> N <sub>3</sub> | -1.96      | +2.45                    | -3.71      | -2.37                    |
| Me <sub>3</sub> PCH <sub>2</sub> ·B <sub>2</sub> N <sub>2</sub>                  | -13.87     | -19.71                   | -1.17      | +2.55                    |
| (Me <sub>3</sub> PCH <sub>2</sub> ) <sub>2</sub> ·B <sub>2</sub> N <sub>2</sub>  | +7.07      | +36.58                   | +3.67      | +12.62                   |
| Me <sub>3</sub> PCH <sub>2</sub> ·B <sub>3</sub> N <sub>3</sub>                  | -6.15      | +1.42                    | -3.31      | -6.95                    |
| (Me <sub>3</sub> PCH <sub>2</sub> ) <sub>2</sub> ·B <sub>3</sub> N <sub>3</sub>  | -2.92      | +5.36                    | -3.16      | -6.39                    |
| (Me <sub>3</sub> PCH <sub>2</sub> ) <sub>3</sub> ·B <sub>3</sub> N <sub>3</sub>  | -0.91      | +4.71                    | -3.78      | -3.37                    |

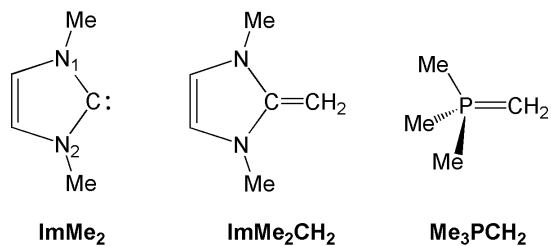

Table S2: NBO Analysis for the Ligands at the M05-2X/cc-pVTZ Level of Theory

| Species                               | NBO Charge                | Bond<br>A-B                       | Occ   | (A)<br>% | Hyb<br>(A)          | (B)<br>% | Hyb<br>(B)         | WBI   |
|---------------------------------------|---------------------------|-----------------------------------|-------|----------|---------------------|----------|--------------------|-------|
| <b>ImMe<sub>2</sub></b>               |                           |                                   |       |          |                     |          |                    |       |
| <i>C<sub>2v</sub></i>                 | C 0.070                   | C-N <sub>1</sub> ( $\sigma$ )     | 1.979 | 33.6     | sp <sup>2.70</sup>  | 66.4     | sp <sup>1.82</sup> | 1.258 |
|                                       | N <sub>1</sub> -0.393     | C-N <sub>1</sub> ( $\pi$ )        | 1.865 | 19.5     | p <sup>1.00</sup>   | 80.5     | p <sup>1.00</sup>  |       |
|                                       | N <sub>2</sub> -0.393     | C (LP)                            | 1.921 | -        | sp <sup>1.11</sup>  | -        | -                  | -     |
|                                       |                           | N <sub>2</sub> (LP)               | 1.571 | -        | p <sup>1.00</sup>   | -        | -                  | -     |
| <b>ImMe<sub>2</sub>CH<sub>2</sub></b> |                           |                                   |       |          |                     |          |                    |       |
| <i>C<sub>2v</sub></i>                 | C 0.366                   | C-N ( $\sigma$ )                  | 1.979 | 38.6     | sp <sup>2.51</sup>  | 61.4     | sp <sup>2.00</sup> | 1.091 |
|                                       | C(H <sub>2</sub> ) -0.722 | C-C(H <sub>2</sub> ) ( $\sigma$ ) | 1.982 | 53.1     | sp <sup>1.32</sup>  | 46.9     | sp <sup>1.71</sup> | 1.613 |
|                                       | N -0.384                  | C-C(H <sub>2</sub> ) ( $\pi$ )    | 1.988 | 37.3     | p <sup>1.00</sup>   | 62.7     | p <sup>1.00</sup>  |       |
|                                       |                           | N (LP)                            | 1.662 | -        | p <sup>1.00</sup>   | -        | -                  | -     |
| <b>Me<sub>3</sub>PCH<sub>2</sub></b>  |                           |                                   |       |          |                     |          |                    |       |
| <i>C<sub>s</sub></i>                  | P 1.567                   | P-C(H <sub>2</sub> ) ( $\sigma$ ) | 1.987 | 43.7     | sp <sup>1.97</sup>  | 56.3     | sp <sup>2.02</sup> | 1.328 |
|                                       | C(H <sub>2</sub> ) -1.268 | C(H <sub>2</sub> ) (LP)           | 1.700 | -        | sp <sup>19.69</sup> | -        | -                  | -     |

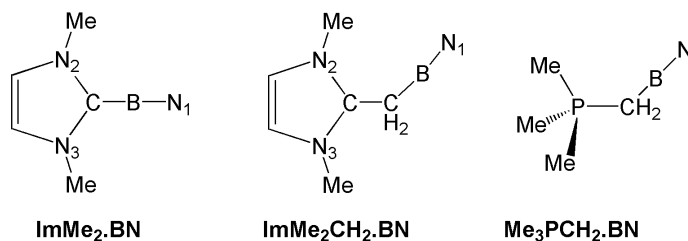

Table S3: NBO Analysis for the BN Systems at the M05-2X/cc-pVTZ Level of Theory. With the Exception of the Cyclic C=C Bond in the ImMe<sub>2</sub> and ImMe<sub>2</sub>CH<sub>2</sub> Containing Complexes, All Other Double Bonds Have Been Omitted for Simplicity from the Above and Following Figures.

| Species                                        | NBO Charge            | Bond<br>A-B                   | Occ                          | (A)<br>%           | Hyb<br>(A)         | (B)<br>%          | Hyb<br>(B)          | WBI               |
|------------------------------------------------|-----------------------|-------------------------------|------------------------------|--------------------|--------------------|-------------------|---------------------|-------------------|
| BN (singlet)<br><i>C<sub>∞v</sub></i>          | B 0.861               | B-N ( $\sigma$ )              | 1.985                        | 15.2               | sp <sup>6.70</sup> | 84.8              | sp <sup>0.01</sup>  | 3.012             |
|                                                | N -0.861              | B-N ( $\pi_1$ )               | 2.000                        | 28.8               | p <sup>1.00</sup>  | 71.2              | p <sup>1.00</sup>   |                   |
|                                                |                       | B-N ( $\pi_2$ )               | 2.000                        | 28.8               | p <sup>1.00</sup>  | 71.2              | p <sup>1.00</sup>   |                   |
|                                                |                       | B-N( $\pi_3$ )                | 1.975                        | 33.0               | sp <sup>0.18</sup> | 67.0              | sp <sup>99.99</sup> |                   |
| BN (triplet)<br><i>C<sub>∞v</sub></i>          | B 0.677               | B-N( $\alpha$ )( $\sigma$ )   | 1.000                        | 23.9               | sp <sup>2.18</sup> | 76.1              | sp <sup>1.34</sup>  | 0.546             |
|                                                | N -0.677              | B-N( $\alpha$ ) ( $\pi_1$ )   | 1.000                        | 25.6               | p <sup>1.00</sup>  | 74.4              | p <sup>1.00</sup>   |                   |
|                                                |                       | B-N ( $\alpha$ ) ( $\pi_2$ )  | 1.000                        | 21.1               | p <sup>1.00</sup>  | 78.9              | p <sup>1.00</sup>   |                   |
|                                                |                       | B ( $\alpha$ ) (LP)           | 0.997                        | -                  | sp <sup>0.42</sup> | -                 | -                   | -                 |
|                                                | N ( $\alpha$ ) (LP)   | 0.996                         | -                            | sp <sup>0.73</sup> | -                  | -                 | -                   |                   |
|                                                |                       | B-N ( $\beta$ )( $\sigma$ )   | 1.000                        | 23.6               | p <sup>1.00</sup>  | 76.4              | p <sup>1.00</sup>   | 0.449             |
|                                                |                       | B-N ( $\beta$ )( $\pi$ )      | 1.000                        | 32.9               | sp <sup>0.17</sup> | 67.1              | sp <sup>3.63</sup>  |                   |
|                                                |                       | N ( $\beta$ ) (LP)            | 0.950                        | -                  | sp <sup>0.27</sup> | -                 | -                   |                   |
| ImMe <sub>2</sub> ·BN<br><i>C<sub>2v</sub></i> | B 0.230               | B-N <sub>1</sub> ( $\sigma$ ) | 1.994                        | 30.0               | sp <sup>1.05</sup> | 70.0              | sp <sup>0.69</sup>  | 2.622             |
|                                                | N <sub>1</sub> -0.753 | B-N <sub>1</sub> ( $\pi_1$ )  | 1.963                        | 37.6               | p <sup>1.00</sup>  | 62.4              | p <sup>1.00</sup>   |                   |
|                                                |                       | C 0.203                       | B-N <sub>1</sub> ( $\pi_2$ ) | 1.892              | 39.1               | p <sup>1.00</sup> | 60.9                | p <sup>1.00</sup> |
|                                                | N <sub>2</sub> -0.297 | B-C ( $\sigma$ )              | 1.969                        | 32.2               | sp <sup>0.95</sup> | 67.8              | sp <sup>1.39</sup>  | 0.944             |
|                                                | N <sub>3</sub> -0.297 | C-N <sub>2</sub> ( $\sigma$ ) | 1.981                        | 38.2               | sp <sup>2.42</sup> | 61.8              | sp <sup>1.90</sup>  |                   |
|                                                |                       | C-N <sub>2</sub> ( $\pi$ )    | 1.875                        | 26.1               | p <sup>1.00</sup>  | 73.9              | p <sup>1.00</sup>   |                   |
|                                                |                       | C-N <sub>3</sub> ( $\sigma$ ) | 1.981                        | 38.2               | sp <sup>2.42</sup> | 61.8              | sp <sup>1.90</sup>  | 1.266             |
|                                                |                       | N <sub>1</sub> (LP)           | 1.966                        | -                  | sp <sup>1.43</sup> | -                 | -                   |                   |
|                                                |                       | N <sub>3</sub> (LP)           | 1.525                        | -                  | p <sup>1.00</sup>  | -                 | -                   |                   |

| Species                                | NBO Charge                | Bond<br>A-B                        | Occ   | (A)<br>% | Hyb<br>(A)          | (B)<br>% | Hyb<br>(B)          | WBI   |
|----------------------------------------|---------------------------|------------------------------------|-------|----------|---------------------|----------|---------------------|-------|
| ImMe <sub>2</sub> CH <sub>2</sub> · BN |                           |                                    |       |          |                     |          |                     |       |
| <i>C</i> <sub>1</sub>                  | B 0.367                   | B-N <sub>1</sub> (σ)               | 1.988 | 34.1     | sp <sup>0.91</sup>  | 65.9     | sp <sup>2.84</sup>  | 2.656 |
|                                        | N <sub>1</sub> -0.887     | B-N <sub>1</sub> (π <sub>1</sub> ) | 1.974 | 33.6     | sp <sup>99.99</sup> | 66.4     | sp <sup>99.99</sup> |       |
|                                        | N <sub>2</sub> -0.320     | B-N <sub>1</sub> (π <sub>2</sub> ) | 1.959 | 33.6     | sp <sup>99.99</sup> | 66.4     | p <sup>1.00</sup>   |       |
|                                        | N <sub>3</sub> -0.336     | B-C(H <sub>2</sub> )(σ)            | 1.914 | 29.0     | sp <sup>1.14</sup>  | 71.0     | sp <sup>3.06</sup>  | 0.772 |
|                                        | C(H <sub>2</sub> ) -0.821 | C-N <sub>2</sub> (σ)               | 1.982 | 39.4     | sp <sup>2.37</sup>  | 60.6     | sp <sup>1.76</sup>  | 1.288 |
|                                        | C 0.523                   | C-N <sub>2</sub> (π)               | 1.897 | 24.4     | p <sup>1.00</sup>   | 75.6     | p <sup>1.00</sup>   | 1.271 |
|                                        |                           | C-N <sub>3</sub> (σ)               | 1.982 | 39.1     | sp <sup>2.38</sup>  | 60.9     | sp <sup>1.74</sup>  |       |
|                                        |                           | N <sub>1</sub> (LP)                | 1.951 | -        | sp <sup>0.36</sup>  | -        | -                   |       |
|                                        |                           | N <sub>3</sub> (LP)                | 1.575 | -        | p <sup>1.00</sup>   | -        | -                   |       |
| Me <sub>3</sub> PCH <sub>2</sub> · BN  |                           |                                    |       |          |                     |          |                     |       |
| <i>C</i> <sub>s</sub>                  | B 0.382                   | B-N (σ)                            | 1.995 | 29.2     | sp <sup>1.16</sup>  | 70.8     | sp <sup>0.65</sup>  | 2.604 |
|                                        | N -0.945                  | B-N (π <sub>1</sub> )              | 1.973 | 34.4     | p <sup>1.00</sup>   | 65.6     | p <sup>1.00</sup>   |       |
|                                        | P 1.630                   | B-N (π <sub>2</sub> )              | 1.955 | 35.3     | sp <sup>99.99</sup> | 64.7     | sp <sup>99.99</sup> | 0.872 |
|                                        | C(H <sub>2</sub> ) -1.046 | B-C(H <sub>2</sub> )(σ)            | 1.964 | 30.4     | sp <sup>0.88</sup>  | 69.6     | sp <sup>2.36</sup>  |       |
|                                        |                           | P-C(H <sub>2</sub> )(σ)            | 1.961 | 41.6     | sp <sup>2.66</sup>  | 58.4     | sp <sup>3.34</sup>  |       |
|                                        |                           | N(LP)                              | 1.959 | -        | sp <sup>1.55</sup>  | -        | -                   |       |

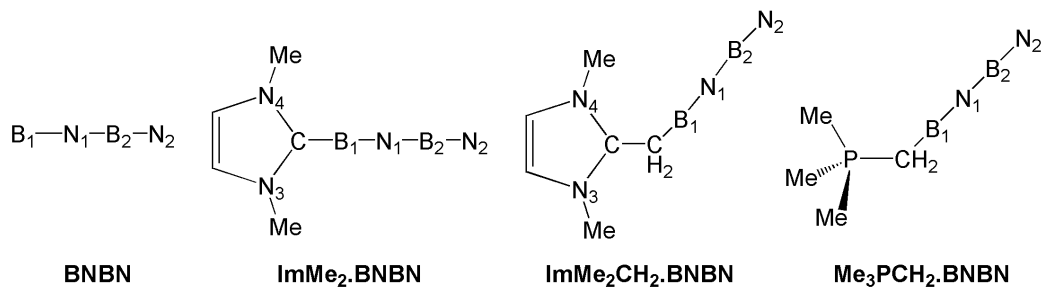

Table S4: NBO Analysis for the BNB Systems at the M05-2X/cc-pVTZ Level of Theory

| Species              | NBO Charge            | Bond<br>A-B                                 | Occ   | (A)<br>% | Hyb<br>(A)          | (B)<br>% | Hyb<br>(B)          | WBI   |
|----------------------|-----------------------|---------------------------------------------|-------|----------|---------------------|----------|---------------------|-------|
| BNBN (singlet)       |                       |                                             |       |          |                     |          |                     |       |
| <i>C<sub>s</sub></i> | B <sub>1</sub> 0.703  | B <sub>1</sub> -N <sub>1</sub> ( $\sigma$ ) | 1.951 | 20.2     | sp <sup>1.19</sup>  | 79.8     | sp <sup>1.28</sup>  | 1.230 |
|                      | B <sub>2</sub> 0.879  | B <sub>1</sub> -N <sub>1</sub> ( $\pi$ )    | 1.873 | 11.3     | p <sup>1.00</sup>   | 88.7     | p <sup>1.00</sup>   |       |
|                      | N <sub>1</sub> -1.214 | B <sub>2</sub> -N <sub>1</sub> ( $\sigma$ ) | 1.986 | 25.4     | sp <sup>1.07</sup>  | 74.6     | sp <sup>1.06</sup>  | 1.340 |
|                      | N <sub>2</sub> -0.368 | B <sub>2</sub> -N <sub>1</sub> ( $\pi$ )    | 1.774 | 17.6     | sp <sup>99.99</sup> | 82.4     | sp <sup>12.42</sup> |       |
|                      |                       | B <sub>2</sub> -N <sub>2</sub> ( $\sigma$ ) | 1.994 | 31.7     | sp <sup>0.95</sup>  | 68.3     | sp <sup>1.58</sup>  | 1.604 |
|                      |                       | B <sub>2</sub> -N <sub>2</sub> ( $\pi$ )    | 1.992 | 20.4     | p <sup>1.00</sup>   | 79.6     | p <sup>1.00</sup>   |       |
|                      |                       | N <sub>2</sub> (LP)                         | 1.977 | -        | sp <sup>0.63</sup>  | -        | -                   | -     |



| Species        | NBO Charge                              | Bond<br>A-B                                              | Occ   | (A)<br>% | Hyb<br>(A)          | (B)<br>% | Hyb<br>(B)          | WBI   |
|----------------|-----------------------------------------|----------------------------------------------------------|-------|----------|---------------------|----------|---------------------|-------|
| BNBN (triplet) |                                         |                                                          |       |          |                     |          |                     |       |
| $C_s$          | B <sub>1</sub> 0.945                    | B <sub>1</sub> -N <sub>1</sub> ( $\alpha$ ) ( $\sigma$ ) | 0.994 | 19.3     | sp <sup>1.85</sup>  | 80.7     | sp <sup>0.87</sup>  | 0.443 |
|                | B <sub>2</sub> 0.925                    | B <sub>1</sub> -N <sub>1</sub> ( $\alpha$ ) ( $\pi_1$ )  | 0.967 | 19.5     | p <sup>1.00</sup>   | 80.5     | p <sup>1.00</sup>   |       |
|                | N <sub>1</sub> -1.286                   | B <sub>1</sub> -N <sub>1</sub> ( $\alpha$ ) ( $\pi_2$ )  | 0.962 | 18.7     | p <sup>1.00</sup>   | 81.3     | p <sup>1.00</sup>   | 0.234 |
|                | N <sub>2</sub> -0.584                   | B <sub>2</sub> -N <sub>1</sub> ( $\alpha$ ) ( $\sigma$ ) | 0.994 | 24.4     | sp <sup>1.11</sup>  | 75.6     | sp <sup>1.15</sup>  |       |
|                |                                         | B <sub>2</sub> -N <sub>2</sub> ( $\alpha$ ) ( $\sigma$ ) | 0.999 | 30.8     | sp <sup>0.90</sup>  | 69.2     | sp <sup>1.44</sup>  | 0.553 |
|                |                                         | B <sub>2</sub> -N <sub>2</sub> ( $\alpha$ ) ( $\pi_1$ )  | 0.993 | 21.5     | p <sup>1.00</sup>   | 78.5     | p <sup>1.00</sup>   |       |
|                |                                         | B <sub>2</sub> -N <sub>2</sub> ( $\alpha$ ) ( $\pi_2$ )  | 0.989 | 25.8     | p <sup>1.00</sup>   | 74.2     | p <sup>1.00</sup>   | -     |
|                |                                         | B <sub>1</sub> ( $\alpha$ ) (LP)                         | 0.989 | -        | sp <sup>0.53</sup>  | -        | -                   |       |
|                |                                         | N <sub>2</sub> ( $\alpha$ ) (LP)                         | 0.987 | -        | sp <sup>0.69</sup>  | -        | -                   |       |
|                |                                         | B <sub>1</sub> -N <sub>1</sub> ( $\beta$ ) ( $\sigma$ )  | 0.994 | 20.3     | sp <sup>0.61</sup>  | 79.7     | sp <sup>0.95</sup>  | 0.370 |
|                |                                         | B <sub>1</sub> -N <sub>1</sub> ( $\beta$ ) ( $\pi_1$ )   | 0.964 | 15.4     | sp <sup>99.99</sup> | 84.6     | sp <sup>99.99</sup> |       |
|                |                                         | B <sub>1</sub> -N <sub>1</sub> ( $\beta$ ) ( $\pi_2$ )   | 0.905 | 12.4     | p <sup>1.00</sup>   | 87.6     | p <sup>1.00</sup>   | 0.276 |
|                |                                         | B <sub>2</sub> -N <sub>1</sub> ( $\beta$ ) ( $\sigma$ )  | 0.992 | 24.2     | sp <sup>1.14</sup>  | 75.8     | sp <sup>1.05</sup>  |       |
|                |                                         | B <sub>2</sub> -N <sub>2</sub> ( $\beta$ ) ( $\sigma$ )  | 0.998 | 31.8     | sp <sup>0.91</sup>  | 68.2     | sp <sup>1.39</sup>  | 0.416 |
|                |                                         | B <sub>2</sub> -N <sub>2</sub> ( $\beta$ ) ( $\pi$ )     | 0.982 | 29.5     | sp <sup>99.99</sup> | 70.5     | sp <sup>99.99</sup> |       |
|                |                                         | N <sub>2</sub> ( $\beta$ ) (LP)                          | 0.985 | -        | sp <sup>0.73</sup>  | -        | -                   | -     |
|                | ImMe <sub>2</sub> ·BNBN                 |                                                          |       |          |                     |          |                     |       |
| $C_{2v}$       | B <sub>1</sub> 0.608                    | B <sub>1</sub> -N <sub>1</sub> ( $\sigma$ )              | 1.982 | 25.7     | sp <sup>1.12</sup>  | 74.3     | sp <sup>0.88</sup>  | 2.062 |
|                | B <sub>2</sub> 0.519                    | B <sub>1</sub> -N <sub>1</sub> ( $\pi_1$ )               | 1.941 | 26.9     | p <sup>1.00</sup>   | 73.1     | p <sup>1.00</sup>   |       |
|                | N <sub>1</sub> -0.851                   | B <sub>1</sub> -N <sub>1</sub> ( $\pi_2$ )               | 1.903 | 27.5     | p <sup>1.00</sup>   | 72.5     | p <sup>1.00</sup>   | 0.915 |
|                | N <sub>2</sub> -0.829                   | B <sub>2</sub> -N <sub>1</sub> ( $\sigma$ )              | 1.980 | 23.8     | sp <sup>1.17</sup>  | 76.2     | sp <sup>1.14</sup>  |       |
|                | N <sub>3</sub> -0.281                   | B <sub>2</sub> -N <sub>2</sub> ( $\sigma$ )              | 1.990 | 30.3     | sp <sup>0.86</sup>  | 69.7     | sp <sup>0.84</sup>  | 2.431 |
|                | N <sub>4</sub> -0.281                   | B <sub>2</sub> -N <sub>2</sub> ( $\pi_1$ )               | 1.926 | 33.7     | p <sup>1.00</sup>   | 66.3     | p <sup>1.00</sup>   |       |
|                | C 0.140                                 | B <sub>2</sub> -N <sub>2</sub> ( $\pi_2$ )               | 1.827 | 35.8     | p <sup>1.00</sup>   | 64.2     | p <sup>1.00</sup>   | 0.966 |
|                |                                         | B <sub>1</sub> -C ( $\sigma$ )                           | 1.969 | 33.3     | sp <sup>0.90</sup>  | 66.7     | sp <sup>1.48</sup>  |       |
|                |                                         | C-N <sub>3</sub> ( $\sigma$ )                            | 1.982 | 38.7     | sp <sup>2.33</sup>  | 61.3     | sp <sup>1.93</sup>  | 1.262 |
|                |                                         | C-N <sub>4</sub> ( $\sigma$ )                            | 1.982 | 38.7     | sp <sup>2.33</sup>  | 61.3     | sp <sup>1.93</sup>  |       |
|                |                                         | C-N <sub>4</sub> ( $\pi$ )                               | 1.875 | 28.1     | p <sup>1.00</sup>   | 71.9     | p <sup>1.00</sup>   | -     |
|                |                                         | N <sub>2</sub> (LP)                                      | 1.965 | -        | sp <sup>1.17</sup>  | -        | -                   |       |
|                |                                         | N <sub>3</sub> (LP)                                      | 1.513 | -        | p <sup>1.00</sup>   | -        | -                   |       |
|                | ImMe <sub>2</sub> CH <sub>2</sub> ·BNBN |                                                          |       |          |                     |          |                     |       |
| $C_1$          | B <sub>1</sub> 0.838                    | B <sub>1</sub> -N <sub>1</sub> ( $\sigma$ )              | 1.986 | 25.1     | sp <sup>1.20</sup>  | 74.9     | sp <sup>0.86</sup>  | 2.018 |
|                | B <sub>2</sub> 0.602                    | B <sub>1</sub> -N <sub>1</sub> ( $\pi_1$ )               | 1.935 | 21.7     | sp <sup>99.99</sup> | 78.3     | sp <sup>1.00</sup>  |       |
|                | N <sub>1</sub> -1.006                   | B <sub>1</sub> -N <sub>1</sub> ( $\pi_2$ )               | 1.936 | 24.9     | sp <sup>99.99</sup> | 75.1     | p <sup>1.00</sup>   | 0.866 |
|                | N <sub>2</sub> -1.062                   | B <sub>2</sub> -N <sub>1</sub> ( $\sigma$ )              | 1.977 | 23.6     | sp <sup>1.13</sup>  | 76.4     | sp <sup>1.16</sup>  |       |
|                | N <sub>3</sub> -0.275                   | B <sub>2</sub> -N <sub>2</sub> ( $\sigma$ )              | 1.992 | 29.4     | sp <sup>0.90</sup>  | 70.6     | sp <sup>0.78</sup>  | 2.449 |
|                | N <sub>4</sub> -0.311                   | B <sub>2</sub> -N <sub>2</sub> ( $\pi_1$ )               | 1.957 | 31.1     | sp <sup>99.99</sup> | 68.9     | sp <sup>99.99</sup> |       |
|                | C(H <sub>2</sub> ) -0.794               | B <sub>2</sub> -N <sub>2</sub> ( $\pi_2$ )               | 1.941 | 31.7     | sp <sup>99.99</sup> | 68.3     | sp <sup>99.99</sup> | 0.898 |
|                | C 0.479                                 | B <sub>1</sub> -C(H <sub>2</sub> ) ( $\sigma$ )          | 1.954 | 33.1     | sp <sup>0.85</sup>  | 66.9     | sp <sup>2.83</sup>  |       |
|                |                                         | C-C(H <sub>2</sub> ) ( $\sigma$ )                        | 1.965 | 50.7     | sp <sup>1.65</sup>  | 49.3     | sp <sup>2.86</sup>  | 1.026 |
|                |                                         | C-N <sub>3</sub> ( $\sigma$ )                            | 1.982 | 38.8     | sp <sup>2.17</sup>  | 61.2     | sp <sup>1.88</sup>  |       |
|                |                                         | C-N <sub>3</sub> ( $\pi$ )                               | 1.886 | 29.7     | sp <sup>99.99</sup> | 70.3     | p <sup>1.00</sup>   | 1.269 |
|                |                                         | C-N <sub>4</sub> ( $\sigma$ )                            | 1.981 | 38.3     | sp <sup>2.26</sup>  | 61.7     | sp <sup>1.88</sup>  |       |
|                |                                         | N <sub>2</sub> (LP)                                      | 1.951 | -        | sp <sup>1.32</sup>  | -        | -                   | -     |
|                |                                         | N <sub>4</sub> (LP)                                      | 1.536 | -        | p <sup>1.00</sup>   | -        | -                   | -     |

| Species                                 | NBO Charge                | Bond<br>A-B                                      | Occ   | (A)<br>% | Hyb<br>(A)          | (B)<br>% | Hyb<br>(B)          | WBI   |
|-----------------------------------------|---------------------------|--------------------------------------------------|-------|----------|---------------------|----------|---------------------|-------|
| Me <sub>3</sub> PCH <sub>2</sub> · BNBN |                           |                                                  |       |          |                     |          |                     |       |
| <i>C<sub>s</sub></i>                    | B <sub>1</sub> 0.858      | B <sub>1</sub> -N <sub>1</sub> (σ)               | 1.986 | 25.2     | sp <sup>1.23</sup>  | 74.8     | sp <sup>0.86</sup>  | 1.997 |
|                                         | B <sub>2</sub> 0.625      | B <sub>1</sub> -N <sub>1</sub> (π <sub>1</sub> ) | 1.936 | 25.1     | p <sup>1.00</sup>   | 74.9     | p <sup>1.00</sup>   |       |
|                                         | N <sub>1</sub> -1.013     | B <sub>1</sub> -N <sub>1</sub> (π <sub>2</sub> ) | 1.930 | 20.7     | sp <sup>99.99</sup> | 79.3     | sp <sup>99.99</sup> |       |
|                                         | N <sub>2</sub> -1.072     | B <sub>2</sub> -N <sub>1</sub> (σ)               | 1.976 | 23.7     | sp <sup>1.12</sup>  | 76.3     | sp <sup>1.16</sup>  | 0.875 |
|                                         | C(H <sub>2</sub> ) -1.075 | B <sub>2</sub> -N <sub>2</sub> (σ)               | 1.992 | 29.5     | sp <sup>0.90</sup>  | 70.5     | sp <sup>0.80</sup>  | 2.406 |
|                                         | P 1.617                   | B <sub>2</sub> -N <sub>2</sub> (π <sub>1</sub> ) | 1.943 | 29.9     | sp <sup>99.99</sup> | 70.1     | sp <sup>65.94</sup> |       |
|                                         |                           | B <sub>2</sub> -N <sub>2</sub> (π <sub>2</sub> ) | 1.932 | 31.6     | p <sup>1.00</sup>   | 68.4     | p <sup>1.00</sup>   |       |
|                                         |                           | B <sub>1</sub> -C(H <sub>2</sub> ) (σ)           | 1.975 | 32.5     | sp <sup>0.83</sup>  | 67.5     | sp <sup>2.54</sup>  | 0.931 |
|                                         |                           | P-C(H <sub>2</sub> ) (σ)                         | 1.952 | 39.1     | sp <sup>3.15</sup>  | 60.9     | sp <sup>3.21</sup>  | 0.906 |
|                                         |                           | N <sub>2</sub> (LP)                              | 1.952 | -        | sp <sup>1.31</sup>  | -        | -                   | -     |

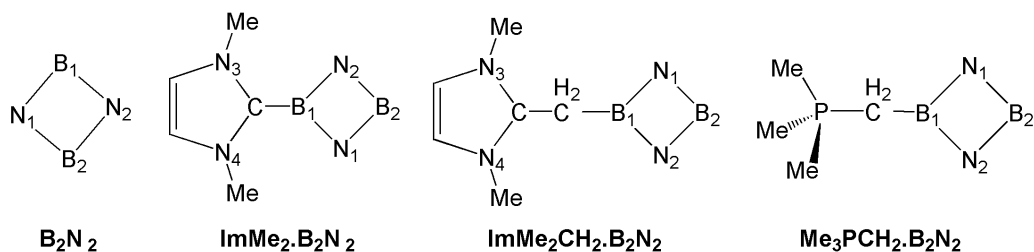

Table S5: NBO Analysis for B<sub>2</sub>N<sub>2</sub> and Its Mono-substituted Complexes at the M05-2X/cc-pVTZ Level of Theory

| Species                                 | NBO Charge            | Bond<br>A-B                        | Occ   | (A)<br>% | Hyb<br>(A)         | (B)<br>% | Hyb<br>(B)         | WBI   |
|-----------------------------------------|-----------------------|------------------------------------|-------|----------|--------------------|----------|--------------------|-------|
| B <sub>2</sub> N <sub>2</sub> (singlet) |                       |                                    |       |          |                    |          |                    |       |
| <i>D<sub>2h</sub></i>                   | B <sub>1</sub> 1.069  | B <sub>1</sub> -N <sub>1</sub> (σ) | 1.853 | 29.3     | sp <sup>1.02</sup> | 70.7     | sp <sup>2.81</sup> | 1.221 |
|                                         | B <sub>2</sub> 1.069  | B <sub>1</sub> -N <sub>2</sub> (σ) | 1.853 | 29.3     | sp <sup>1.02</sup> | 70.7     | sp <sup>2.81</sup> | 1.221 |
|                                         | N <sub>1</sub> -1.069 | B <sub>1</sub> -N <sub>2</sub> (π) | 1.745 | 12.7     | p <sup>1.00</sup>  | 87.3     | p <sup>1.00</sup>  |       |
|                                         | N <sub>2</sub> -1.069 | B <sub>2</sub> -N <sub>1</sub> (σ) | 1.853 | 29.3     | sp <sup>1.02</sup> | 70.7     | sp <sup>2.81</sup> | 1.221 |
|                                         |                       | B <sub>2</sub> -N <sub>1</sub> (π) | 1.745 | 12.7     | p <sup>1.00</sup>  | 87.3     | p <sup>1.00</sup>  |       |
|                                         |                       | B <sub>2</sub> -N <sub>2</sub> (σ) | 1.853 | 29.3     | sp <sup>1.02</sup> | 70.7     | sp <sup>2.81</sup> | 1.221 |
|                                         |                       | N <sub>1</sub> (LP)                | 1.884 | -        | sp <sup>1.08</sup> | -        | -                  | -     |
|                                         |                       | N <sub>2</sub> (LP)                | 1.884 | -        | sp <sup>1.08</sup> | -        | -                  | -     |

| Species                                          | NBO Charge            | Bond<br>A-B                                              | Occ                            | (A)<br>% | Hyb<br>(A)          | (B)<br>%           | Hyb<br>(B)          | WBI                |
|--------------------------------------------------|-----------------------|----------------------------------------------------------|--------------------------------|----------|---------------------|--------------------|---------------------|--------------------|
| B <sub>2</sub> N <sub>2</sub> (triplet)          |                       |                                                          |                                |          |                     |                    |                     |                    |
| <i>D<sub>2h</sub></i>                            | B <sub>1</sub> 0.737  | B <sub>1</sub> -N <sub>1</sub> ( $\alpha$ ) ( $\sigma$ ) | 0.961                          | 33.0     | sp <sup>1.03</sup>  | 67.0               | sp <sup>2.96</sup>  | 0.281              |
|                                                  | B <sub>2</sub> 0.737  | B <sub>1</sub> -N <sub>1</sub> ( $\alpha$ ) ( $\pi$ )    | 0.907                          | 9.2      | p <sup>1.00</sup>   | 90.8               | p <sup>1.00</sup>   |                    |
|                                                  | N <sub>1</sub> -0.737 | B <sub>1</sub> -N <sub>2</sub> ( $\alpha$ ) ( $\sigma$ ) | 0.961                          | 33.0     | sp <sup>1.03</sup>  | 67.0               | sp <sup>2.96</sup>  | 0.281              |
|                                                  | N <sub>2</sub> -0.737 | B <sub>2</sub> -N <sub>1</sub> ( $\alpha$ ) ( $\sigma$ ) | 0.961                          | 33.0     | sp <sup>1.03</sup>  | 67.0               | sp <sup>2.96</sup>  | 0.281              |
|                                                  |                       | B <sub>2</sub> -N <sub>2</sub> ( $\alpha$ ) ( $\sigma$ ) | 0.961                          | 33.0     | sp <sup>1.03</sup>  | 67.0               | sp <sup>2.96</sup>  | 0.281              |
|                                                  |                       | B <sub>2</sub> -N <sub>2</sub> ( $\alpha$ ) ( $\pi$ )    | 0.907                          | 9.2      | p <sup>1.00</sup>   | 90.8               | p <sup>1.00</sup>   |                    |
|                                                  |                       | B <sub>1</sub> -B <sub>2</sub> ( $\alpha$ ) ( $\sigma$ ) | 0.795                          | 50.0     | sp <sup>16.32</sup> | 50.0               | sp <sup>16.32</sup> | 0.177              |
|                                                  |                       | N <sub>1</sub> ( $\alpha$ ) (LP)                         | 0.982                          | -        | sp <sup>1.00</sup>  | -                  | -                   | -                  |
|                                                  |                       | N <sub>2</sub> ( $\alpha$ ) (LP)                         | 0.982                          | -        | sp <sup>1.00</sup>  | -                  | -                   | -                  |
|                                                  |                       | B-N ( $\beta$ ) ( $\sigma$ )**                           | 0.949                          | 28.2     | sp <sup>1.06</sup>  | 71.8               | sp <sup>2.71</sup>  | 0.290              |
|                                                  |                       | N <sub>1</sub> ( $\beta$ ) (LP) (1)                      | 0.962                          | -        | sp <sup>1.14</sup>  | -                  | -                   | -                  |
|                                                  |                       | N <sub>1</sub> ( $\beta$ ) (LP) (2)                      | 0.262                          | -        | p <sup>1.00</sup>   | -                  | -                   | -                  |
|                                                  |                       | N <sub>2</sub> ( $\beta$ ) (LP) (1)                      | 0.962                          | -        | sp <sup>1.14</sup>  | -                  | -                   | -                  |
| ImMe <sub>2</sub> ·B <sub>2</sub> N <sub>2</sub> |                       |                                                          |                                |          |                     |                    |                     |                    |
| <i>C<sub>2v</sub></i>                            | B <sub>1</sub> 0.654  | B <sub>1</sub> -N <sub>1</sub> ( $\sigma$ )              | 1.789                          | 31.2     | sp <sup>2.06</sup>  | 68.8               | sp <sup>2.48</sup>  | 0.998              |
|                                                  | B <sub>2</sub> 0.901  | B <sub>1</sub> -N <sub>1</sub> ( $\pi$ )                 | 1.747                          | 12.2     | p <sup>1.00</sup>   | 87.8               | p <sup>1.00</sup>   |                    |
|                                                  | N <sub>1</sub> -1.102 | B <sub>1</sub> -N <sub>2</sub> ( $\sigma$ )              | 1.789                          | 31.2     | sp <sup>2.06</sup>  | 68.8               | sp <sup>2.48</sup>  | 0.998              |
|                                                  | N <sub>2</sub> -1.102 | B <sub>2</sub> -N <sub>1</sub> ( $\sigma$ )              | 1.957                          | 30.8     | sp <sup>1.18</sup>  | 69.2               | sp <sup>2.60</sup>  | 1.320              |
|                                                  | N <sub>3</sub> -0.270 | B <sub>2</sub> -N <sub>2</sub> ( $\sigma$ )              | 1.957                          | 30.8     | sp <sup>1.18</sup>  | 69.2               | sp <sup>2.60</sup>  | 1.320              |
|                                                  | N <sub>4</sub> -0.270 | B <sub>2</sub> -N <sub>2</sub> ( $\pi$ )                 | 1.751                          | 12.3     | p <sup>1.00</sup>   | 87.7               | p <sup>1.00</sup>   |                    |
|                                                  |                       | C 0.235                                                  | B <sub>1</sub> -C ( $\sigma$ ) | 1.960    | 34.1                | sp <sup>1.87</sup> | 65.9                | sp <sup>1.46</sup> |
|                                                  |                       | C-N <sub>3</sub> ( $\sigma$ )                            | 1.982                          | 38.1     | sp <sup>2.35</sup>  | 61.9               | sp <sup>1.89</sup>  | 1.304              |
|                                                  |                       | C-N <sub>4</sub> ( $\sigma$ )                            | 1.982                          | 38.1     | sp <sup>2.35</sup>  | 61.9               | sp <sup>1.89</sup>  | 1.304              |
|                                                  |                       | C-N <sub>4</sub> ( $\pi$ )                               | 1.871                          | 28.2     | p <sup>1.00</sup>   | 71.8               | p <sup>1.00</sup>   |                    |
|                                                  |                       | N <sub>1</sub> (LP)                                      | 1.929                          | -        | sp <sup>1.27</sup>  | -                  | -                   | -                  |
|                                                  |                       | N <sub>2</sub> (LP)                                      | 1.929                          | -        | sp <sup>1.27</sup>  | -                  | -                   | -                  |
|                                                  |                       | N <sub>3</sub> (LP)                                      | 1.486                          | -        | p <sup>1.00</sup>   | -                  | -                   | -                  |

\*\*B-N represents B<sub>1</sub>-N<sub>1</sub>, B<sub>1</sub>-N<sub>2</sub>, B<sub>2</sub>-N<sub>1</sub>, and B<sub>2</sub>-N<sub>2</sub>.

| Species                                                           | NBO Charge                | Bond<br>A-B                            | Occ   | (A)<br>%           | Hyb<br>(A)          | (B)<br>% | Hyb<br>(B)          | WBI   |
|-------------------------------------------------------------------|---------------------------|----------------------------------------|-------|--------------------|---------------------|----------|---------------------|-------|
| ImMe <sub>2</sub> CH <sub>2</sub> · B <sub>2</sub> N <sub>2</sub> |                           |                                        |       |                    |                     |          |                     |       |
| <i>C<sub>s</sub></i>                                              | B <sub>1</sub> 0.783      | B <sub>1</sub> -N <sub>1</sub> (σ)     | 1.784 | 29.3               | sp <sup>2.12</sup>  | 70.7     | sp <sup>2.35</sup>  | 0.969 |
|                                                                   | B <sub>2</sub> 0.853      | B <sub>1</sub> -N <sub>2</sub> (σ)     | 1.784 | 29.3               | sp <sup>2.16</sup>  | 70.7     | sp <sup>2.38</sup>  | 0.969 |
|                                                                   | N <sub>1</sub> -1.129     | B <sub>1</sub> -N <sub>2</sub> (π)     | 1.739 | 11.6               | sp <sup>99.99</sup> | 88.4     | sp <sup>99.99</sup> |       |
|                                                                   | N <sub>2</sub> -1.129     | B <sub>2</sub> -N <sub>1</sub> (σ)     | 1.956 | 31.1               | sp <sup>1.21</sup>  | 68.9     | sp <sup>2.64</sup>  | 1.344 |
|                                                                   | N <sub>3</sub> -0.301     | B <sub>2</sub> -N <sub>1</sub> (π)     | 1.761 | 12.8               | sp <sup>99.99</sup> | 87.2     | sp <sup>99.99</sup> |       |
|                                                                   | N <sub>4</sub> -0.301     | B <sub>2</sub> -N <sub>2</sub> (σ)     | 1.956 | 31.1               | sp <sup>1.20</sup>  | 68.9     | sp <sup>2.62</sup>  | 1.344 |
|                                                                   | C(H <sub>2</sub> ) -0.738 | B <sub>1</sub> -C(H <sub>2</sub> ) (σ) | 1.910 | 32.6               | sp <sup>1.76</sup>  | 67.4     | sp <sup>2.69</sup>  | 0.801 |
|                                                                   | C 0.509                   | C-C(H <sub>2</sub> ) (σ)               | 1.966 | 51.9               | sp <sup>1.55</sup>  | 48.1     | sp <sup>2.96</sup>  | 1.059 |
|                                                                   |                           | C-N <sub>3</sub> (σ)                   | 1.981 | 38.4               | sp <sup>2.29</sup>  | 61.6     | sp <sup>1.89</sup>  | 1.284 |
|                                                                   |                           | C-N <sub>3</sub> (π)                   | 1.880 | 26.6               | p <sup>1.00</sup>   | 73.4     | sp <sup>99.99</sup> |       |
|                                                                   |                           | C-N <sub>4</sub> (σ)                   | 1.981 | 38.4               | sp <sup>2.29</sup>  | 61.6     | sp <sup>1.89</sup>  | 1.284 |
|                                                                   |                           | N <sub>1</sub> (LP)                    | 1.928 | -                  | sp <sup>1.33</sup>  | -        | -                   | -     |
|                                                                   |                           | N <sub>2</sub> (LP)                    | 1.928 | -                  | sp <sup>1.33</sup>  | -        | -                   | -     |
|                                                                   |                           | N <sub>4</sub> (LP)                    | 1.517 | -                  | p <sup>1.00</sup>   | -        | -                   | -     |
| Me <sub>3</sub> PCH <sub>2</sub> · B <sub>2</sub> N <sub>2</sub>  |                           |                                        |       |                    |                     |          |                     |       |
| <i>C<sub>s</sub></i>                                              | B <sub>1</sub> 0.769      | B <sub>1</sub> -N <sub>1</sub> (σ)     | 1.806 | 30.1               | sp <sup>1.87</sup>  | 69.9     | sp <sup>2.07</sup>  | 1.096 |
|                                                                   | B <sub>2</sub> 0.860      | B <sub>1</sub> -N <sub>2</sub> (σ)     | 1.757 | 29.1               | sp <sup>2.48</sup>  | 70.9     | sp <sup>2.90</sup>  | 0.846 |
|                                                                   | N <sub>1</sub> -1.051     | B <sub>1</sub> -N <sub>2</sub> (π)     | 1.743 | 8.3                | p <sup>1.00</sup>   | 91.7     | p <sup>1.00</sup>   |       |
|                                                                   | N <sub>2</sub> -1.202     | B <sub>2</sub> -N <sub>1</sub> (σ)     | 1.948 | 31.8               | sp <sup>1.17</sup>  | 68.2     | sp <sup>2.91</sup>  | 1.316 |
|                                                                   | P 1.637                   | B <sub>2</sub> -N <sub>1</sub> (π)     | 1.708 | 13.5               | p <sup>1.00</sup>   | 86.5     | p <sup>1.00</sup>   |       |
|                                                                   | C(H <sub>2</sub> ) -1.037 | B <sub>2</sub> -N <sub>2</sub> (σ)     | 1.966 | 30.1               | sp <sup>1.21</sup>  | 69.9     | sp <sup>2.24</sup>  | 1.372 |
|                                                                   |                           | B <sub>1</sub> -C(H <sub>2</sub> ) (σ) | 1.956 | 32.1               | sp <sup>1.74</sup>  | 67.9     | sp <sup>2.36</sup>  | 0.840 |
|                                                                   |                           | P-C(H <sub>2</sub> ) (σ)               | 1.975 | 41.4               | sp <sup>2.69</sup>  | 58.6     | sp <sup>3.06</sup>  | 0.964 |
|                                                                   |                           | N <sub>1</sub> (LP)                    | 1.928 | -                  | sp <sup>1.35</sup>  | -        | -                   | -     |
|                                                                   | N <sub>2</sub> (LP)       | 1.932                                  | -     | sp <sup>1.28</sup> | -                   | -        | -                   |       |

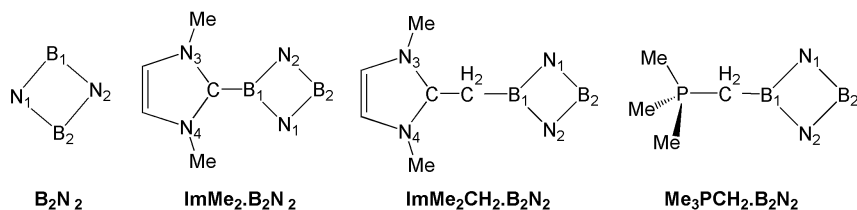

Table S6: NBO Analysis for the Di-substituted  $\text{B}_2\text{N}_2$  Complexes at the M05-2X/cc-pVTZ Level of Theory

| Species                                                    | NBO Charge          | Bond<br>A-B                          | Occ   | (A)<br>% | Hyb<br>(A)          | (B)<br>% | Hyb<br>(B)          | WBI   |
|------------------------------------------------------------|---------------------|--------------------------------------|-------|----------|---------------------|----------|---------------------|-------|
| $(\text{ImMe}_2)_2 \cdot \text{B}_2\text{N}_2$<br>$C_{2v}$ | $\text{B}_1$ 0.676  | $\text{B}_1\text{-N}_1$ ( $\sigma$ ) | 1.880 | 25.6     | $\text{sp}^{1.61}$  | 74.4     | $\text{sp}^{2.44}$  | 1.068 |
|                                                            | $\text{B}_2$ 0.676  | $\text{B}_1\text{-N}_1$ ( $\pi$ )    | 1.643 | 8.8      | $\text{sp}^{24.07}$ | 91.2     | $\text{sp}^{46.22}$ |       |
|                                                            | $\text{N}_1$ -1.233 | $\text{B}_2\text{-N}_1$ ( $\sigma$ ) | 1.926 | 28.5     | $\text{sp}^{2.14}$  | 71.5     | $\text{sp}^{2.20}$  | 1.068 |
|                                                            | $\text{N}_2$ -1.233 | $\text{B}_1\text{-C}$ ( $\sigma$ )   | 1.962 | 32.0     | $\text{sp}^{3.05}$  | 68.0     | $\text{sp}^{1.38}$  | 0.817 |
|                                                            | $\text{N}_3$ -0.291 | $\text{B}_2\text{-C}$ ( $\sigma$ )   | 1.966 | 32.0     | $\text{sp}^{2.69}$  | 68.0     | $\text{sp}^{1.38}$  | 0.817 |
|                                                            | $\text{C}$ 0.268    | $\text{C-N}_2$ ( $\sigma$ )          | 1.982 | 37.4     | $\text{sp}^{2.43}$  | 62.6     | $\text{sp}^{1.86}$  | 1.300 |
|                                                            |                     | $\text{C-N}_2$ ( $\pi$ )             | 1.870 | 26.1     | $\text{p}^{1.00}$   | 73.9     | $\text{p}^{1.00}$   |       |
|                                                            |                     | $\text{C-N}_3$ ( $\sigma$ )          | 1.982 | 37.4     | $\text{sp}^{2.43}$  | 62.6     | $\text{sp}^{1.86}$  | 1.300 |
|                                                            |                     | $\text{N}_1$ (LP)                    | 1.917 | -        | $\text{sp}^{1.64}$  | -        | -                   | -     |
|                                                            |                     | $\text{N}_3$ (LP)                    | 1.504 | -        | $\text{p}^{1.00}$   | -        | -                   | -     |

| Species                                                                          | NBO Charge                | Bond<br>A-B              | Occ   | (A)<br>% | Hyb<br>(A)          | (B)<br>% | Hyb<br>(B)          | WBI   |
|----------------------------------------------------------------------------------|---------------------------|--------------------------|-------|----------|---------------------|----------|---------------------|-------|
| <i>(ImMe<sub>2</sub>CH<sub>2</sub>)<sub>2</sub> · B<sub>2</sub>N<sub>2</sub></i> |                           |                          |       |          |                     |          |                     |       |
| <i>C<sub>2</sub></i>                                                             | B 0.826                   | B-N <sub>1</sub> (σ)     | 1.927 | 26.7     | sp <sup>1.85</sup>  | 73.3     | sp <sup>2.06</sup>  | 1.079 |
|                                                                                  | N <sub>1</sub> -1.300     | B-N <sub>1</sub> (π)     | 1.744 | 13.2     | sp <sup>40.36</sup> | 86.8     | sp <sup>67.34</sup> |       |
|                                                                                  | N <sub>2</sub> -1.300     | B-N <sub>2</sub> (σ)     | 1.914 | 26.8     | sp <sup>1.64</sup>  | 73.2     | sp <sup>2.20</sup>  | 1.028 |
|                                                                                  | N <sub>3</sub> -0.326     | B-C(H <sub>2</sub> ) (σ) | 1.865 | 29.0     | sp <sup>3.05</sup>  | 71.0     | sp <sup>2.90</sup>  | 0.685 |
|                                                                                  | N <sub>4</sub> -0.320     | C-N <sub>3</sub> (σ)     | 1.980 | 38.0     | sp <sup>2.38</sup>  | 62.0     | sp <sup>1.89</sup>  | 1.246 |
|                                                                                  | C(H <sub>2</sub> ) -0.756 | C-N <sub>4</sub> (σ)     | 1.980 | 38.2     | sp <sup>2.34</sup>  | 61.8     | sp <sup>1.89</sup>  | 1.254 |
|                                                                                  | C 0.527                   | C-N <sub>4</sub> (π)     | 1.874 | 24.6     | sp <sup>99.99</sup> | 75.4     | sp <sup>99.99</sup> |       |
|                                                                                  |                           | C-C(H <sub>2</sub> ) (σ) | 1.971 | 52.4     | sp <sup>1.46</sup>  | 47.6     | sp <sup>2.80</sup>  | 1.126 |
|                                                                                  |                           | N <sub>1</sub> (LP)      | 1.914 | -        | sp <sup>1.84</sup>  | -        | -                   | -     |
|                                                                                  |                           | N <sub>2</sub> (LP)      | 1.914 | -        | sp <sup>1.84</sup>  | -        | -                   | -     |
|                                                                                  |                           | N <sub>3</sub> (LP)      | 1.548 | -        | p <sup>1.00</sup>   | -        | -                   | -     |
| <i>(Me<sub>3</sub>PCH<sub>2</sub>)<sub>2</sub> · B<sub>2</sub>N<sub>2</sub></i>  |                           |                          |       |          |                     |          |                     |       |
| <i>C<sub>2</sub></i>                                                             | B 0.820                   | B-N <sub>1</sub> (σ)     | 1.932 | 27.0     | sp <sup>1.58</sup>  | 73.0     | sp <sup>1.88</sup>  | 1.062 |
|                                                                                  | N <sub>1</sub> -1.328     | B-N <sub>2</sub> (σ)     | 1.925 | 26.6     | sp <sup>2.02</sup>  | 73.4     | sp <sup>2.34</sup>  | 1.031 |
|                                                                                  | N <sub>2</sub> -1.328     | B-N <sub>2</sub> (π)     | 1.745 | 12.2     | sp <sup>46.16</sup> | 87.8     | sp <sup>99.99</sup> |       |
|                                                                                  | C(H <sub>2</sub> ) -1.058 | B-C(H <sub>2</sub> ) (σ) | 1.956 | 29.0     | sp <sup>2.86</sup>  | 71.0     | sp <sup>2.27</sup>  | 0.763 |
|                                                                                  | P 1.647                   | P-C(H <sub>2</sub> ) (σ) | 1.977 | 42.4     | sp <sup>2.51</sup>  | 57.6     | sp <sup>3.18</sup>  | 0.988 |
|                                                                                  |                           | N <sub>1</sub> (LP)      | 1.918 | -        | sp <sup>1.85</sup>  | -        | -                   | -     |
|                                                                                  |                           | N <sub>2</sub> (LP)      | 1.918 | -        | sp <sup>1.85</sup>  | -        | -                   | -     |

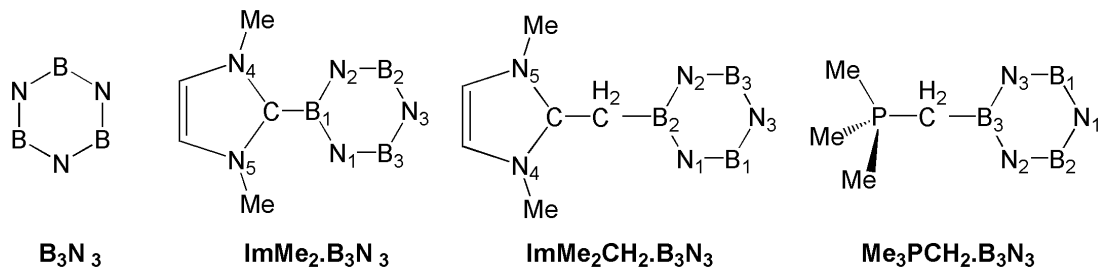

Table S7: NBO Analysis for  $B_3N_3$  and Its Mono-substituted Complexes at the M05-2X/cc-pVTZ Level of Theory

| Species              | NBO Charge | Bond<br>A-B      | Occ   | (A)<br>% | Hyb<br>(A)  | (B)<br>% | Hyb<br>(B)  | WBI   |
|----------------------|------------|------------------|-------|----------|-------------|----------|-------------|-------|
| $B_3N_3$<br>$D_{3h}$ | B 1.058    | B-N ( $\sigma$ ) | 1.919 | 27.6     | $sp^{1.01}$ | 72.4     | $sp^{2.08}$ | 1.326 |
|                      | N -1.508   | B-N ( $\pi$ )    | 1.761 | 17.6     | $p^{1.00}$  | 82.4     | $p^{1.00}$  |       |
|                      |            | N (LP)           | 1.773 | -        | $sp^{1.79}$ | -        | -           |       |



| Species                                                           | NBO Charge                | Bond<br>A-B                            | Occ   | (A)<br>%          | Hyb<br>(A)          | (B)<br>% | Hyb<br>(B)          | WBI   |
|-------------------------------------------------------------------|---------------------------|----------------------------------------|-------|-------------------|---------------------|----------|---------------------|-------|
| ImMe <sub>2</sub> ·B <sub>3</sub> N <sub>3</sub>                  |                           |                                        |       |                   |                     |          |                     |       |
| C <sub>1</sub>                                                    | B <sub>1</sub> 1.041      | B <sub>1</sub> -N <sub>1</sub> (σ)     | 1.981 | 27.6              | sp <sup>1.00</sup>  | 72.4     | sp <sup>1.51</sup>  | 1.405 |
|                                                                   | B <sub>2</sub> 0.749      | B <sub>1</sub> -N <sub>3</sub> (σ)     | 1.917 | 27.4              | sp <sup>1.05</sup>  | 72.6     | sp <sup>2.04</sup>  | 1.314 |
|                                                                   | B <sub>3</sub> 1.046      | B <sub>1</sub> -N <sub>3</sub> (π)     | 1.758 | 17.4              | p <sup>1.00</sup>   | 82.6     | p <sup>1.00</sup>   |       |
|                                                                   | C 0.251                   | B <sub>2</sub> -N <sub>1</sub> (σ)     | 1.902 | 27.3              | sp <sup>1.82</sup>  | 72.7     | sp <sup>1.91</sup>  | 1.082 |
|                                                                   | N <sub>1</sub> -1.171     | B <sub>2</sub> -N <sub>1</sub> (π)     | 1.738 | 16.2              | p <sup>1.00</sup>   | 83.8     | sp <sup>99.99</sup> |       |
|                                                                   | N <sub>2</sub> -1.178     | B <sub>2</sub> -N <sub>2</sub> (σ)     | 1.905 | 27.2              | sp <sup>1.79</sup>  | 72.8     | sp <sup>1.89</sup>  | 1.082 |
|                                                                   | N <sub>3</sub> -1.081     | B <sub>3</sub> -N <sub>2</sub> (σ)     | 1.981 | 27.5              | sp <sup>1.00</sup>  | 72.5     | sp <sup>1.49</sup>  | 1.398 |
|                                                                   | N <sub>4</sub> -0.288     | B <sub>3</sub> -N <sub>2</sub> (π)     | 1.782 | 18.1              | p <sup>1.00</sup>   | 81.9     | p <sup>1.00</sup>   |       |
|                                                                   | N <sub>5</sub> -0.289     | B <sub>3</sub> -N <sub>3</sub> (σ)     | 1.918 | 27.4              | sp <sup>1.05</sup>  | 72.6     | sp <sup>2.03</sup>  | 1.316 |
|                                                                   |                           | B <sub>2</sub> -C (σ)                  | 1.962 | 31.8              | sp <sup>2.47</sup>  | 68.2     | sp <sup>1.39</sup>  | 0.837 |
|                                                                   |                           | C-N <sub>4</sub> (σ)                   | 1.982 | 37.5              | sp <sup>2.42</sup>  | 62.5     | sp <sup>1.85</sup>  | 1.298 |
|                                                                   |                           | C-N <sub>4</sub> (π)                   | 1.872 | 26.7              | p <sup>1.00</sup>   | 73.3     | p <sup>1.00</sup>   |       |
|                                                                   |                           | C-N <sub>5</sub> (σ)                   | 1.982 | 37.5              | sp <sup>2.42</sup>  | 62.5     | sp <sup>1.85</sup>  | 1.297 |
|                                                                   |                           | N <sub>1</sub> (LP)                    | 1.842 | -                 | sp <sup>2.82</sup>  | -        | -                   | -     |
|                                                                   |                           | N <sub>2</sub> (LP)                    | 1.840 | -                 | sp <sup>2.89</sup>  | -        | -                   | -     |
|                                                                   |                           | N <sub>3</sub> (LP)                    | 1.789 | -                 | sp <sup>1.88</sup>  | -        | -                   | -     |
|                                                                   |                           | N <sub>5</sub> (LP)                    | 1.503 | -                 | p <sup>1.00</sup>   | -        | -                   | -     |
| ImMe <sub>2</sub> CH <sub>2</sub> · B <sub>3</sub> N <sub>3</sub> |                           |                                        |       |                   |                     |          |                     |       |
| C <sub>1</sub>                                                    | B <sub>1</sub> 1.031      | B <sub>1</sub> -N <sub>1</sub> (σ)     | 1.979 | 27.5              | sp <sup>1.01</sup>  | 72.5     | sp <sup>1.45</sup>  | 1.415 |
|                                                                   | B <sub>2</sub> 0.863      | B <sub>1</sub> -N <sub>1</sub> (π)     | 1.806 | 18.0              | p <sup>1.00</sup>   | 82.0     | sp <sup>99.99</sup> |       |
|                                                                   | B <sub>3</sub> 1.023      | B <sub>1</sub> -N <sub>3</sub> (σ)     | 1.919 | 27.4              | sp <sup>1.06</sup>  | 72.6     | sp <sup>1.99</sup>  | 1.315 |
|                                                                   | C 0.551                   | B <sub>2</sub> -N <sub>1</sub> (σ)     | 1.894 | 25.6              | sp <sup>1.93</sup>  | 74.4     | sp <sup>1.93</sup>  | 1.022 |
|                                                                   | C(H <sub>2</sub> ) -0.763 | B <sub>2</sub> -N <sub>2</sub> (σ)     | 1.899 | 26.3              | sp <sup>1.77</sup>  | 73.7     | sp <sup>1.83</sup>  | 1.096 |
|                                                                   | N <sub>1</sub> -1.232     | B <sub>2</sub> -N <sub>2</sub> (π)     | 1.735 | 16.3              | sp <sup>99.99</sup> | 83.7     | p <sup>1.00</sup>   |       |
|                                                                   | N <sub>2</sub> -1.157     | B <sub>3</sub> -N <sub>2</sub> (σ)     | 1.977 | 28.0              | sp <sup>0.99</sup>  | 72.0     | sp <sup>1.56</sup>  | 1.436 |
|                                                                   | N <sub>3</sub> -1.097     | B <sub>3</sub> -N <sub>3</sub> (σ)     | 1.917 | 27.4              | sp <sup>1.07</sup>  | 72.6     | sp <sup>2.03</sup>  | 1.295 |
|                                                                   | N <sub>4</sub> -0.310     | B <sub>3</sub> -N <sub>3</sub> (π)     | 1.763 | 16.9              | p <sup>1.00</sup>   | 83.1     | p <sup>1.00</sup>   |       |
|                                                                   | N <sub>5</sub> -0.318     | B <sub>2</sub> -C(H <sub>2</sub> ) (σ) | 1.901 | 29.8              | sp <sup>2.38</sup>  | 70.2     | sp <sup>2.65</sup>  | 0.749 |
|                                                                   |                           | C-C(H <sub>2</sub> )(σ)                | 1.975 | 52.2              | sp <sup>1.49</sup>  | 47.8     | sp <sup>2.78</sup>  | 1.088 |
|                                                                   |                           | C-N <sub>4</sub> (σ)                   | 1.981 | 37.9              | sp <sup>2.30</sup>  | 62.1     | sp <sup>1.85</sup>  | 1.275 |
|                                                                   |                           | C-N <sub>4</sub> (π)                   | 1.881 | 25.2              | p <sup>1.00</sup>   | 74.8     | sp <sup>99.99</sup> |       |
|                                                                   |                           | C-N <sub>5</sub> (σ)                   | 1.980 | 37.8              | sp <sup>2.38</sup>  | 62.2     | sp <sup>1.86</sup>  | 1.263 |
|                                                                   |                           | N <sub>1</sub> (LP)                    | 1.846 | -                 | sp <sup>2.91</sup>  | -        | -                   | -     |
|                                                                   |                           | N <sub>2</sub> (LP)                    | 1.830 | -                 | sp <sup>2.82</sup>  | -        | -                   | -     |
|                                                                   |                           | N <sub>3</sub> (LP)                    | 1.790 | -                 | sp <sup>1.92</sup>  | -        | -                   | -     |
|                                                                   | N <sub>5</sub> (LP)       | 1.539                                  | -     | p <sup>1.00</sup> | -                   | -        | -                   |       |

| Species                                                          | NBO Charge                | Bond<br>A-B                            | Occ   | (A)<br>% | Hyb<br>(A)          | (B)<br>% | Hyb<br>(B)         | WBI   |
|------------------------------------------------------------------|---------------------------|----------------------------------------|-------|----------|---------------------|----------|--------------------|-------|
| Me <sub>3</sub> PCH <sub>2</sub> · B <sub>3</sub> N <sub>3</sub> |                           |                                        |       |          |                     |          |                    |       |
| C <sub>1</sub>                                                   | B <sub>1</sub> 1.007      | B <sub>1</sub> -N <sub>1</sub> (σ)     | 1.922 | 27.6     | sp <sup>1.11</sup>  | 72.4     | sp <sup>1.98</sup> | 1.302 |
|                                                                  | B <sub>2</sub> 1.007      | B <sub>1</sub> -N <sub>1</sub> (π)     | 1.770 | 17.1     | p <sup>1.00</sup>   | 82.9     | p <sup>1.00</sup>  |       |
|                                                                  | B <sub>3</sub> 0.690      | B <sub>1</sub> -N <sub>3</sub> (σ)     | 1.966 | 28.9     | sp <sup>1.00</sup>  | 71.1     | sp <sup>2.28</sup> | 1.378 |
|                                                                  | C(H <sub>2</sub> ) -1.062 | B <sub>2</sub> -N <sub>1</sub> (σ)     | 1.922 | 27.6     | sp <sup>1.11</sup>  | 72.4     | sp <sup>1.98</sup> | 1.301 |
|                                                                  | P 1.658                   | B <sub>2</sub> -N <sub>2</sub> (σ)     | 1.965 | 28.9     | sp <sup>1.00</sup>  | 71.1     | sp <sup>2.29</sup> | 1.379 |
|                                                                  | N <sub>1</sub> -1.097     | B <sub>2</sub> -N <sub>2</sub> (π)     | 1.746 | 18.1     | p <sup>1.00</sup>   | 81.9     | p <sup>1.00</sup>  |       |
|                                                                  | N <sub>2</sub> -1.076     | B <sub>3</sub> -N <sub>2</sub> (σ)     | 1.866 | 28.0     | sp <sup>1.47</sup>  | 72.0     | sp <sup>1.68</sup> | 1.145 |
|                                                                  | N <sub>3</sub> -1.080     | B <sub>3</sub> -N <sub>3</sub> (σ)     | 1.865 | 28.0     | sp <sup>1.48</sup>  | 72.0     | sp <sup>1.68</sup> | 1.143 |
|                                                                  |                           | B <sub>3</sub> -N <sub>3</sub> (π)     | 1.751 | 18.7     | sp <sup>99.99</sup> | 81.3     | p <sup>1.00</sup>  |       |
|                                                                  |                           | B <sub>3</sub> -C(H <sub>2</sub> ) (σ) | 1.903 | 28.8     | sp <sup>4.22</sup>  | 71.2     | sp <sup>2.38</sup> | 0.689 |
|                                                                  |                           | P-C(H <sub>2</sub> ) (σ)               | 1.980 | 41.3     | sp <sup>2.03</sup>  | 58.7     | sp <sup>2.72</sup> | 1.046 |
|                                                                  |                           | N <sub>1</sub> (LP)                    | 1.789 | -        | sp <sup>1.99</sup>  | -        | -                  | -     |
|                                                                  |                           | N <sub>2</sub> (LP)                    | 1.841 | -        | sp <sup>2.03</sup>  | -        | -                  | -     |
|                                                                  |                           | N <sub>3</sub> (LP)                    | 1.842 | -        | sp <sup>2.05</sup>  | -        | -                  | -     |

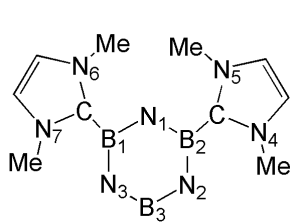

$(\text{ImMe}_2)_2 \cdot \text{B}_3\text{N}_3$

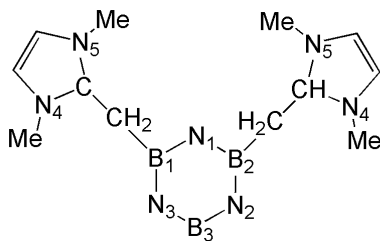

$(\text{ImMe}_2\text{CH}_2)_2 \cdot \text{B}_3\text{N}_3$

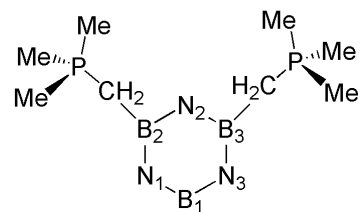

$(\text{Me}_3\text{PCH}_2)_2 \cdot \text{B}_3\text{N}_3$

### Di-substituted $\text{B}_3\text{N}_3$ Complexes

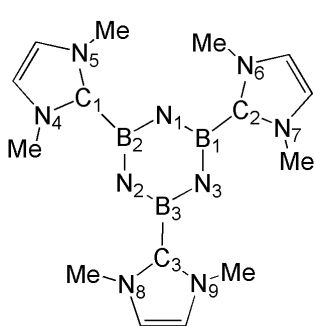

$(\text{ImMe}_2)_3 \cdot \text{B}_3\text{N}_3$

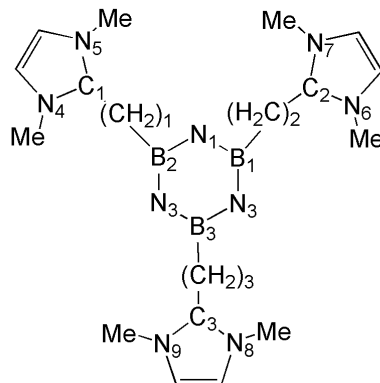

$(\text{ImMe}_2\text{CH}_2)_3 \cdot \text{B}_3\text{N}_3$

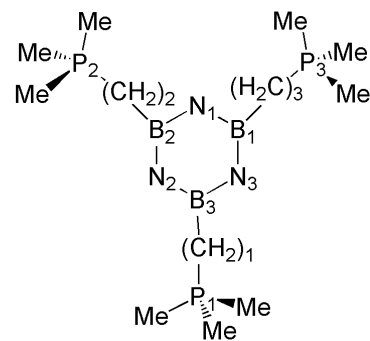

$(\text{Me}_3\text{PCH}_2)_3 \cdot \text{B}_3\text{N}_3$

### Tri-substituted $\text{B}_3\text{N}_3$ Complexes

Table S8: NBO Analysis for the Di-substituted B<sub>3</sub>N<sub>3</sub> Complexes at the M05-2X/cc-pVTZ Level of Theory

| Species                                                                            | NBO Charge            | Bond<br>A-B                        | Occ                  | (A)<br>% | Hyb<br>(A)         | (B)<br>%           | Hyb<br>(B)          | WBI                |       |
|------------------------------------------------------------------------------------|-----------------------|------------------------------------|----------------------|----------|--------------------|--------------------|---------------------|--------------------|-------|
| (ImMe <sub>2</sub> ) <sub>2</sub> ·B <sub>3</sub> N <sub>3</sub><br>C <sub>2</sub> | B <sub>1</sub> 0.720  | B <sub>1</sub> -N <sub>1</sub> (σ) | 1.975                | 27.4     | sp <sup>1.65</sup> | 72.6               | sp <sup>1.44</sup>  | 1.163              |       |
|                                                                                    | B <sub>2</sub> 0.720  | B <sub>1</sub> -N <sub>3</sub> (σ) | 1.904                | 27.2     | sp <sup>1.83</sup> | 72.8               | sp <sup>1.90</sup>  | 1.088              |       |
|                                                                                    | B <sub>3</sub> 1.058  | B <sub>1</sub> -N <sub>3</sub> (π) | 1.731                | 17.2     | p <sup>1.00</sup>  | 82.8               | sp <sup>99.99</sup> |                    |       |
|                                                                                    | C 0.279               | B <sub>2</sub> -N <sub>1</sub> (σ) | 1.975                | 27.4     | sp <sup>1.65</sup> | 72.6               | sp <sup>1.44</sup>  | 1.163              |       |
|                                                                                    | N <sub>1</sub> -1.237 | B <sub>2</sub> -N <sub>1</sub> (π) | 1.745                | 17.4     | p <sup>1.00</sup>  | 82.6               | p <sup>1.00</sup>   |                    |       |
|                                                                                    | N <sub>2</sub> -1.175 | B <sub>2</sub> -N <sub>2</sub> (σ) | 1.904                | 27.2     | sp <sup>1.83</sup> | 72.8               | sp <sup>1.89</sup>  | 1.088              |       |
|                                                                                    | N <sub>3</sub> -1.175 | B <sub>3</sub> -N <sub>2</sub> (σ) | 1.978                | 27.0     | sp <sup>1.07</sup> | 73.0               | sp <sup>1.46</sup>  | 1.375              |       |
|                                                                                    | N <sub>4</sub> -0.301 | B <sub>3</sub> -N <sub>2</sub> (π) | 1.753                | 18.1     | p <sup>1.00</sup>  | 81.9               | p <sup>1.00</sup>   |                    |       |
|                                                                                    | N <sub>5</sub> -0.300 | B <sub>3</sub> -N <sub>3</sub> (σ) | 1.978                | 27.0     | sp <sup>1.07</sup> | 73.0               | sp <sup>1.46</sup>  | 1.375              |       |
|                                                                                    | N <sub>6</sub> -0.300 | B <sub>1</sub> -C (σ)              | 1.962                | 30.9     | sp <sup>2.73</sup> | 69.1               | sp <sup>1.34</sup>  | 0.823              |       |
|                                                                                    | N <sub>7</sub> -0.301 | C-N <sub>4</sub> (σ)               | 1.982                | 37.1     | sp <sup>2.48</sup> | 62.9               | sp <sup>1.84</sup>  | 1.290              |       |
|                                                                                    |                       |                                    | C-N <sub>4</sub> (π) | 1.869    | 25.4               | p <sup>1.00</sup>  | 74.6                | p <sup>1.00</sup>  |       |
|                                                                                    |                       |                                    | C-N <sub>5</sub> (σ) | 1.982    | 37.1               | sp <sup>2.46</sup> | 62.9                | sp <sup>1.83</sup> | 1.293 |
|                                                                                    |                       |                                    | C-N <sub>6</sub> (σ) | 1.982    | 37.1               | sp <sup>2.46</sup> | 62.9                | sp <sup>1.83</sup> | 1.293 |
|                                                                                    |                       |                                    | C-N <sub>6</sub> (π) | 1.872    | 25.4               | p <sup>1.00</sup>  | 74.6                | p <sup>1.00</sup>  |       |
|                                                                                    |                       |                                    | C-N <sub>7</sub> (σ) | 1.982    | 37.1               | sp <sup>2.48</sup> | 62.9                | sp <sup>1.84</sup> | 1.290 |
|                                                                                    |                       |                                    | N <sub>1</sub> (LP)  | 1.867    | -                  | sp <sup>4.44</sup> | -                   | -                  | -     |
|                                                                                    |                       |                                    | N <sub>2</sub> (LP)  | 1.852    | -                  | sp <sup>2.97</sup> | -                   | -                  | -     |
|                                                                                    |                       |                                    | N <sub>3</sub> (LP)  | 1.852    | -                  | sp <sup>2.97</sup> | -                   | -                  | -     |
|                                                                                    |                       |                                    | N <sub>5</sub> (LP)  | 1.515    | -                  | p <sup>1.00</sup>  | -                   | -                  | -     |
|                                                                                    |                       | N <sub>7</sub> (LP)                | 1.513                | -        | p <sup>1.00</sup>  | -                  | -                   | -                  |       |

| Species                                                                          | NBO Charge                             | Bond<br>(A-B)                                                | Occ   | (A)<br>%           | Hyb<br>(A)          | B<br>(%) | Hyb<br>(B)         | WBI   |
|----------------------------------------------------------------------------------|----------------------------------------|--------------------------------------------------------------|-------|--------------------|---------------------|----------|--------------------|-------|
| <i>(ImMe<sub>2</sub>CH<sub>2</sub>)<sub>2</sub> · B<sub>3</sub>N<sub>3</sub></i> |                                        |                                                              |       |                    |                     |          |                    |       |
| <i>C<sub>2</sub></i>                                                             | B <sub>1</sub> 0.861                   | B <sub>1</sub> -N <sub>1</sub> ( $\sigma$ )                  | 1.971 | 26.2               | sp <sup>1.65</sup>  | 73.8     | sp <sup>1.41</sup> | 1.153 |
|                                                                                  | B <sub>2</sub> 0.861                   | B <sub>1</sub> -N <sub>1</sub> ( $\pi$ )                     | 1.762 | 16.2               | sp <sup>99.99</sup> | 83.8     | p <sup>1.00</sup>  |       |
|                                                                                  | B <sub>3</sub> 1.058                   | B <sub>1</sub> -N <sub>3</sub> ( $\sigma$ )                  | 1.902 | 25.7               | sp <sup>1.83</sup>  | 74.3     | sp <sup>1.86</sup> | 1.053 |
|                                                                                  | C(H <sub>2</sub> ) -0.749              | B <sub>2</sub> -N <sub>1</sub> ( $\sigma$ )                  | 1.971 | 26.2               | sp <sup>1.65</sup>  | 73.8     | sp <sup>1.41</sup> | 1.153 |
|                                                                                  | C 0.525                                | B <sub>2</sub> -N <sub>2</sub> ( $\sigma$ )                  | 1.902 | 25.7               | sp <sup>1.83</sup>  | 74.3     | sp <sup>1.86</sup> | 1.053 |
|                                                                                  | N <sub>1</sub> -1.308                  | B <sub>2</sub> -N <sub>2</sub> ( $\pi$ )                     | 1.745 | 15.4               | sp <sup>99.99</sup> | 84.6     | p <sup>1.00</sup>  |       |
|                                                                                  | N <sub>2</sub> -1.235                  | B <sub>3</sub> -N <sub>2</sub> ( $\sigma$ )                  | 1.974 | 27.0               | sp <sup>1.09</sup>  | 73.0     | sp <sup>1.45</sup> | 1.373 |
|                                                                                  | N <sub>3</sub> -1.235                  | B <sub>3</sub> -N <sub>3</sub> ( $\sigma$ )                  | 1.974 | 27.0               | sp <sup>1.09</sup>  | 73.0     | sp <sup>1.45</sup> | 1.373 |
|                                                                                  | N <sub>4</sub> -0.318                  | B <sub>3</sub> -N <sub>3</sub> ( $\pi$ )                     | 1.784 | 17.4               | p <sup>1.00</sup>   | 82.6     | p <sup>1.00</sup>  |       |
|                                                                                  | N <sub>5</sub> -0.320                  | B <sub>1</sub> -C(H <sub>2</sub> ) ( $\sigma$ )              | 1.875 | 28.4               | sp <sup>2.73</sup>  | 71.6     | sp <sup>2.70</sup> | 0.702 |
|                                                                                  |                                        | C-C(H <sub>2</sub> ) ( $\sigma$ )                            | 1.972 | 52.6               | sp <sup>1.46</sup>  | 47.4     | sp <sup>2.89</sup> | 1.111 |
|                                                                                  |                                        | C-N <sub>4</sub> ( $\sigma$ )                                | 1.981 | 38.1               | sp <sup>2.35</sup>  | 61.9     | sp <sup>1.88</sup> | 1.259 |
|                                                                                  |                                        | C-N <sub>4</sub> ( $\pi$ )                                   | 1.877 | 24.8               | sp <sup>99.99</sup> | 75.2     | p <sup>1.00</sup>  |       |
|                                                                                  |                                        | C-N <sub>5</sub> ( $\sigma$ )                                | 1.981 | 38.1               | sp <sup>2.37</sup>  | 61.9     | sp <sup>1.88</sup> | 1.256 |
|                                                                                  |                                        | N <sub>1</sub> (LP)                                          | 1.867 | -                  | sp <sup>4.74</sup>  | -        | -                  | -     |
|                                                                                  |                                        | N <sub>2</sub> (LP)                                          | 1.848 | -                  | sp <sup>3.05</sup>  | -        | -                  | -     |
|                                                                                  |                                        | N <sub>3</sub> (LP)                                          | 1.848 | -                  | sp <sup>3.05</sup>  | -        | -                  | -     |
|                                                                                  | N <sub>5</sub> (LP)                    | 1.544                                                        | -     | sp <sup>1.00</sup> | -                   | -        | -                  |       |
| <i>(Me<sub>3</sub>PCH<sub>2</sub>)<sub>2</sub> · B<sub>3</sub>N<sub>3</sub></i>  |                                        |                                                              |       |                    |                     |          |                    |       |
| <i>C<sub>1</sub></i>                                                             | B <sub>1</sub> 1.055                   | B <sub>1</sub> -N <sub>1</sub> ( $\sigma$ )                  | 1.976 | 27.5               | sp <sup>1.07</sup>  | 72.5     | sp <sup>1.30</sup> | 1.443 |
|                                                                                  | B <sub>2</sub> 0.839                   | B <sub>1</sub> -N <sub>1</sub> ( $\pi$ )                     | 1.781 | 18.9               | p <sup>1.00</sup>   | 81.1     | p <sup>1.00</sup>  |       |
|                                                                                  | B <sub>3</sub> 0.849                   | B <sub>1</sub> -N <sub>3</sub> ( $\sigma$ )                  | 1.976 | 26.5               | sp <sup>1.10</sup>  | 73.5     | sp <sup>1.42</sup> | 1.309 |
|                                                                                  | C(H <sub>2</sub> ) <sub>1</sub> -1.051 | B <sub>2</sub> -N <sub>1</sub> ( $\sigma$ )                  | 1.895 | 26.6               | sp <sup>1.79</sup>  | 73.4     | sp <sup>1.89</sup> | 1.075 |
|                                                                                  | C(H <sub>2</sub> ) <sub>2</sub> -1.053 | B <sub>2</sub> -N <sub>2</sub> ( $\sigma$ )                  | 1.973 | 26.4               | sp <sup>1.74</sup>  | 73.6     | sp <sup>1.51</sup> | 1.126 |
|                                                                                  | P <sub>1</sub> 1.644                   | B <sub>2</sub> -N <sub>2</sub> ( $\pi$ )                     | 1.764 | 15.5               | p <sup>1.00</sup>   | 84.4     | p <sup>1.00</sup>  |       |
|                                                                                  | P <sub>2</sub> 1.646                   | B <sub>3</sub> -N <sub>2</sub> ( $\sigma$ )                  | 1.974 | 26.5               | sp <sup>1.62</sup>  | 73.5     | sp <sup>1.31</sup> | 1.173 |
|                                                                                  | N <sub>1</sub> -1.165                  | B <sub>3</sub> -N <sub>3</sub> ( $\sigma$ )                  | 1.908 | 25.6               | sp <sup>1.90</sup>  | 74.4     | sp <sup>1.87</sup> | 1.035 |
|                                                                                  | N <sub>2</sub> -1.318                  | B <sub>3</sub> -N <sub>3</sub> ( $\pi$ )                     | 1.772 | 14.6               | p <sup>1.00</sup>   | 85.4     | p <sup>1.00</sup>  |       |
|                                                                                  | N <sub>3</sub> -1.298                  | B <sub>2</sub> -C(H <sub>2</sub> ) <sub>1</sub> ( $\sigma$ ) | 1.951 | 28.1               | sp <sup>2.62</sup>  | 71.9     | sp <sup>2.18</sup> | 0.763 |
|                                                                                  |                                        | B <sub>3</sub> -C(H <sub>2</sub> ) <sub>2</sub> ( $\sigma$ ) | 1.953 | 27.9               | sp <sup>2.67</sup>  | 72.1     | sp <sup>2.13</sup> | 0.762 |
|                                                                                  |                                        | P <sub>1</sub> -C(H <sub>2</sub> ) <sub>1</sub> ( $\sigma$ ) | 1.979 | 42.7               | sp <sup>2.43</sup>  | 57.3     | sp <sup>3.19</sup> | 0.995 |
|                                                                                  |                                        | P <sub>2</sub> -C(H <sub>2</sub> ) <sub>2</sub> ( $\sigma$ ) | 1.980 | 38.4               | sp <sup>3.68</sup>  | 61.6     | sp <sup>2.59</sup> | 1.000 |
|                                                                                  |                                        | N <sub>1</sub> (LP)                                          | 1.839 | -                  | sp <sup>2.96</sup>  | -        | -                  | -     |
|                                                                                  |                                        | N <sub>2</sub> (LP)                                          | 1.870 | -                  | sp <sup>4.87</sup>  | -        | -                  | -     |
|                                                                                  | N <sub>3</sub> (LP)                    | 1.858                                                        | -     | sp <sup>3.12</sup> | -                   | -        | -                  |       |

Table S9: NBO Analysis for the Tri-substituted B<sub>3</sub>N<sub>3</sub> Complexes at the M05-2X/cc-pVTZ Level of Theory

| Species                                                          | NBO Charge            | Bond (A-B)                         | Occ   | (A) % | Hyb (A)             | B (%) | Hyb (B)             | WBI   |
|------------------------------------------------------------------|-----------------------|------------------------------------|-------|-------|---------------------|-------|---------------------|-------|
| (ImMe <sub>2</sub> ) <sub>3</sub> ·B <sub>3</sub> N <sub>3</sub> |                       |                                    |       |       |                     |       |                     |       |
| <i>C</i> <sub>2</sub>                                            |                       |                                    |       |       |                     |       |                     |       |
|                                                                  | B <sub>1</sub> 0.757  | B <sub>1</sub> -N <sub>1</sub> (σ) | 1.972 | 26.7  | sp <sup>1.64</sup>  | 73.3  | sp <sup>1.43</sup>  | 1.141 |
|                                                                  | B <sub>2</sub> 0.757  | B <sub>1</sub> -N <sub>3</sub> (σ) | 1.971 | 26.9  | sp <sup>1.63</sup>  | 73.1  | sp <sup>1.46</sup>  | 1.144 |
|                                                                  | B <sub>3</sub> 0.748  | B <sub>1</sub> -N <sub>3</sub> (π) | 1.722 | 17.7  | p <sup>1.00</sup>   | 82.3  | sp <sup>99.99</sup> |       |
|                                                                  | C <sub>1</sub> 0.292  | B <sub>2</sub> -N <sub>1</sub> (σ) | 1.972 | 26.7  | sp <sup>1.64</sup>  | 73.3  | sp <sup>1.43</sup>  | 1.141 |
|                                                                  | C <sub>2</sub> 0.292  | B <sub>2</sub> -N <sub>1</sub> (π) | 1.731 | 17.5  | sp <sup>99.99</sup> | 82.5  | p <sup>1.00</sup>   |       |
|                                                                  | C <sub>3</sub> 0.311  | B <sub>2</sub> -N <sub>2</sub> (σ) | 1.971 | 26.8  | sp <sup>1.63</sup>  | 73.2  | sp <sup>1.46</sup>  | 1.144 |
|                                                                  | N <sub>1</sub> -1.248 | B <sub>3</sub> -N <sub>2</sub> (σ) | 1.970 | 26.7  | sp <sup>1.62</sup>  | 73.3  | sp <sup>1.42</sup>  | 1.148 |
|                                                                  | N <sub>2</sub> -1.238 | B <sub>3</sub> -N <sub>2</sub> (π) | 1.729 | 18.1  | sp <sup>99.99</sup> | 81.9  | sp <sup>99.99</sup> |       |
|                                                                  | N <sub>3</sub> -1.238 | B <sub>3</sub> -N <sub>3</sub> (σ) | 1.970 | 26.7  | sp <sup>1.62</sup>  | 73.3  | sp <sup>1.42</sup>  | 1.148 |
|                                                                  | N <sub>4</sub> -0.310 | B <sub>1</sub> -C <sub>2</sub> (σ) | 1.958 | 29.4  | sp <sup>3.15</sup>  | 70.6  | sp <sup>1.30</sup>  | 0.797 |
|                                                                  | N <sub>5</sub> -0.310 | B <sub>2</sub> -C <sub>1</sub> (σ) | 1.959 | 29.4  | sp <sup>3.14</sup>  | 70.6  | sp <sup>1.30</sup>  | 0.797 |
|                                                                  | N <sub>6</sub> -0.310 | B <sub>3</sub> -C <sub>3</sub> (σ) | 1.957 | 29.5  | sp <sup>3.20</sup>  | 70.5  | sp <sup>1.30</sup>  | 0.792 |
|                                                                  | N <sub>7</sub> -0.310 | C <sub>1</sub> -N <sub>4</sub> (σ) | 1.981 | 36.8  | sp <sup>2.51</sup>  | 63.2  | sp <sup>1.81</sup>  | 1.286 |
|                                                                  | N <sub>8</sub> -0.316 | C <sub>1</sub> -N <sub>5</sub> (σ) | 1.982 | 36.8  | sp <sup>2.52</sup>  | 63.2  | sp <sup>1.80</sup>  | 1.286 |
|                                                                  | N <sub>9</sub> -0.316 | C <sub>1</sub> -N <sub>5</sub> (π) | 1.870 | 24.5  | p <sup>1.00</sup>   | 75.5  | p <sup>1.00</sup>   |       |
|                                                                  |                       | C <sub>2</sub> -N <sub>6</sub> (σ) | 1.982 | 36.8  | sp <sup>2.52</sup>  | 63.2  | sp <sup>1.80</sup>  | 1.286 |
|                                                                  |                       | C <sub>2</sub> -N <sub>6</sub> (π) | 1.870 | 24.5  | p <sup>1.00</sup>   | 75.5  | p <sup>1.00</sup>   |       |
|                                                                  |                       | C <sub>2</sub> -N <sub>7</sub> (σ) | 1.981 | 36.8  | sp <sup>2.51</sup>  | 63.2  | sp <sup>1.81</sup>  | 1.286 |
|                                                                  |                       | C <sub>3</sub> -N <sub>8</sub> (σ) | 1.981 | 36.7  | sp <sup>2.51</sup>  | 63.3  | sp <sup>1.81</sup>  | 1.286 |
|                                                                  |                       | C <sub>3</sub> -N <sub>8</sub> (π) | 1.871 | 23.9  | p <sup>1.00</sup>   | 76.1  | p <sup>1.00</sup>   |       |
|                                                                  |                       | C <sub>3</sub> -N <sub>9</sub> (σ) | 1.982 | 36.7  | sp <sup>2.51</sup>  | 63.3  | sp <sup>1.81</sup>  | 1.286 |
|                                                                  |                       | N <sub>1</sub> (LP)                | 1.867 | -     | sp <sup>4.56</sup>  | -     | -                   | -     |
|                                                                  |                       | N <sub>2</sub> (LP)                | 1.873 | -     | sp <sup>4.48</sup>  | -     | -                   | -     |
|                                                                  |                       | N <sub>3</sub> (LP)                | 1.873 | -     | sp <sup>4.48</sup>  | -     | -                   | -     |
|                                                                  |                       | N <sub>4</sub> (LP)                | 1.523 | -     | p <sup>1.00</sup>   | -     | -                   | -     |
|                                                                  |                       | N <sub>7</sub> (LP)                | 1.523 | -     | p <sup>1.00</sup>   | -     | -                   | -     |
|                                                                  |                       | N <sub>9</sub> (LP)                | 1.529 | -     | p <sup>1.00</sup>   | -     | -                   | -     |

| Species                                                                         | NBO Charge                             | Bond<br>(A-B)                                                | Occ   | (A)<br>%          | Hyb<br>(A)          | B<br>(%) | Hyb<br>(B)          | WBI   |
|---------------------------------------------------------------------------------|----------------------------------------|--------------------------------------------------------------|-------|-------------------|---------------------|----------|---------------------|-------|
| <b>(ImMe<sub>2</sub>CH<sub>2</sub>)<sub>3</sub>· B<sub>3</sub>N<sub>3</sub></b> |                                        |                                                              |       |                   |                     |          |                     |       |
| <i>C</i> <sub>1</sub>                                                           | B <sub>1</sub> 0.904                   | B <sub>1</sub> -N <sub>1</sub> ( $\sigma$ )                  | 1.967 | 25.3              | sp <sup>1.60</sup>  | 74.7     | sp <sup>1.38</sup>  | 1.135 |
|                                                                                 | B <sub>2</sub> 0.909                   | B <sub>1</sub> -N <sub>1</sub> ( $\pi$ )                     | 1.761 | 16.4              | sp <sup>99.99</sup> | 83.6     | sp <sup>99.99</sup> |       |
|                                                                                 | B <sub>3</sub> 0.909                   | B <sub>1</sub> -N <sub>3</sub> ( $\sigma$ )                  | 1.964 | 25.5              | sp <sup>1.60</sup>  | 74.5     | sp <sup>1.43</sup>  | 1.121 |
|                                                                                 | C(H <sub>2</sub> ) <sub>1</sub> -0.750 | B <sub>2</sub> -N <sub>1</sub> ( $\sigma$ )                  | 1.966 | 25.4              | sp <sup>1.59</sup>  | 74.6     | sp <sup>1.41</sup>  | 1.124 |
|                                                                                 | C(H <sub>2</sub> ) <sub>2</sub> -0.750 | B <sub>2</sub> -N <sub>2</sub> ( $\sigma$ )                  | 1.966 | 25.3              | sp <sup>1.58</sup>  | 74.7     | sp <sup>1.38</sup>  | 1.137 |
|                                                                                 | C(H <sub>2</sub> ) <sub>3</sub> -0.751 | B <sub>2</sub> -N <sub>2</sub> ( $\pi$ )                     | 1.758 | 16.4              | sp <sup>99.99</sup> | 83.6     | sp <sup>99.99</sup> |       |
|                                                                                 | C <sub>1</sub> 0.525                   | B <sub>3</sub> -N <sub>2</sub> ( $\sigma$ )                  | 1.966 | 25.3              | sp <sup>1.57</sup>  | 74.7     | sp <sup>1.41</sup>  | 1.126 |
|                                                                                 | C <sub>2</sub> 0.524                   | B <sub>3</sub> -N <sub>3</sub> ( $\sigma$ )                  | 1.966 | 25.3              | sp <sup>1.57</sup>  | 74.7     | sp <sup>1.37</sup>  | 1.145 |
|                                                                                 | C <sub>3</sub> 0.527                   | B <sub>3</sub> -N <sub>3</sub> ( $\pi$ )                     | 1.760 | 16.7              | sp <sup>99.99</sup> | 83.3     | sp <sup>99.99</sup> |       |
|                                                                                 | N <sub>1</sub> -1.332                  | B <sub>1</sub> -C(H <sub>2</sub> ) <sub>2</sub> ( $\sigma$ ) | 1.842 | 26.4              | sp <sup>3.36</sup>  | 73.6     | sp <sup>2.89</sup>  | 0.642 |
|                                                                                 | N <sub>2</sub> -1.331                  | B <sub>2</sub> -C(H <sub>2</sub> ) <sub>1</sub> ( $\sigma$ ) | 1.835 | 26.2              | sp <sup>3.44</sup>  | 73.8     | sp <sup>2.96</sup>  | 0.633 |
|                                                                                 | N <sub>3</sub> -1.326                  | B <sub>3</sub> -C(H <sub>2</sub> ) <sub>3</sub> ( $\sigma$ ) | 1.824 | 25.9              | sp <sup>3.54</sup>  | 74.1     | sp <sup>3.06</sup>  | 0.620 |
|                                                                                 | N <sub>4</sub> -0.331                  | C <sub>1</sub> -C(H <sub>2</sub> ) <sub>1</sub> ( $\sigma$ ) | 1.973 | 52.8              | sp <sup>1.42</sup>  | 47.2     | sp <sup>2.78</sup>  | 1.154 |
|                                                                                 | N <sub>5</sub> -0.327                  | C <sub>2</sub> -C(H <sub>2</sub> ) <sub>2</sub> ( $\sigma$ ) | 1.973 | 52.8              | sp <sup>1.43</sup>  | 47.2     | sp <sup>2.81</sup>  | 1.145 |
|                                                                                 | N <sub>6</sub> -0.325                  | C <sub>3</sub> -C(H <sub>2</sub> ) <sub>3</sub> ( $\sigma$ ) | 1.974 | 52.8              | sp <sup>1.41</sup>  | 47.2     | sp <sup>2.72</sup>  | 1.167 |
|                                                                                 | N <sub>7</sub> -0.328                  | C <sub>1</sub> -N <sub>4</sub> ( $\sigma$ )                  | 1.980 | 38.0              | sp <sup>2.42</sup>  | 62.0     | sp <sup>1.88</sup>  | 1.232 |
|                                                                                 | N <sub>8</sub> -0.334                  | C <sub>1</sub> -N <sub>5</sub> ( $\sigma$ )                  | 1.980 | 38.1              | sp <sup>2.39</sup>  | 61.9     | sp <sup>1.88</sup>  | 1.238 |
|                                                                                 | N <sub>9</sub> -0.333                  | C <sub>1</sub> -N <sub>5</sub> ( $\pi$ )                     | 1.873 | 23.8              | sp <sup>99.99</sup> | 76.2     | sp <sup>99.99</sup> |       |
|                                                                                 |                                        | C <sub>2</sub> -N <sub>6</sub> ( $\sigma$ )                  | 1.980 | 38.1              | sp <sup>2.39</sup>  | 61.9     | sp <sup>1.88</sup>  | 1.242 |
|                                                                                 |                                        | C <sub>2</sub> -N <sub>6</sub> ( $\pi$ )                     | 1.874 | 24.0              | sp <sup>99.99</sup> | 76.0     | sp <sup>99.99</sup> |       |
|                                                                                 |                                        | C <sub>2</sub> -N <sub>7</sub> ( $\sigma$ )                  | 1.980 | 38.1              | sp <sup>2.40</sup>  | 61.9     | sp <sup>1.88</sup>  | 1.238 |
|                                                                                 |                                        | C <sub>3</sub> -N <sub>8</sub> ( $\sigma$ )                  | 1.980 | 38.0              | sp <sup>2.41</sup>  | 62.0     | sp <sup>1.88</sup>  | 1.230 |
|                                                                                 |                                        | C <sub>3</sub> -N <sub>8</sub> ( $\pi$ )                     | 1.873 | 23.3              | sp <sup>99.99</sup> | 76.7     | sp <sup>99.99</sup> |       |
|                                                                                 |                                        | C <sub>3</sub> -N <sub>9</sub> ( $\sigma$ )                  | 1.980 | 38.0              | sp <sup>2.42</sup>  | 62.0     | sp <sup>1.88</sup>  | 1.230 |
|                                                                                 |                                        | N <sub>1</sub> (LP)                                          | 1.866 | -                 | sp <sup>4.96</sup>  | -        | -                   | -     |
|                                                                                 |                                        | N <sub>2</sub> (LP)                                          | 1.867 | -                 | sp <sup>4.97</sup>  | -        | -                   | -     |
|                                                                                 |                                        | N <sub>3</sub> (LP)                                          | 1.869 | -                 | sp <sup>4.91</sup>  | -        | -                   | -     |
|                                                                                 | N <sub>4</sub> (LP)                    | 1.561                                                        | -     | p <sup>1.00</sup> | -                   | -        | -                   |       |
|                                                                                 | N <sub>7</sub> (LP)                    | 1.556                                                        | -     | p <sup>1.00</sup> | -                   | -        | -                   |       |
|                                                                                 | N <sub>9</sub> (LP)                    | 1.561                                                        | -     | p <sup>1.00</sup> | -                   | -        | -                   |       |

| Species                                                  | NBO Charge                             | Bond<br>A-B                                                  | Occ   | (A)<br>% | Hyb<br>(A)          | (B)<br>%           | Hyb<br>(B)          | WBI   |   |
|----------------------------------------------------------|----------------------------------------|--------------------------------------------------------------|-------|----------|---------------------|--------------------|---------------------|-------|---|
| $(\text{Me}_3\text{PCH}_2)_3 \cdot \text{B}_3\text{N}_3$ |                                        |                                                              |       |          |                     |                    |                     |       |   |
| $C_1$                                                    | B <sub>1</sub> 0.871                   | B <sub>1</sub> -N <sub>1</sub> ( $\sigma$ )                  | 1.968 | 25.3     | sp <sup>1.61</sup>  | 74.7               | sp <sup>1.32</sup>  | 1.149 |   |
|                                                          | B <sub>2</sub> 0.854                   | B <sub>1</sub> -N <sub>3</sub> ( $\sigma$ )                  | 1.969 | 24.8     | sp <sup>1.66</sup>  | 75.2               | sp <sup>1.29</sup>  | 1.118 |   |
|                                                          | B <sub>3</sub> 0.869                   | B <sub>1</sub> -N <sub>3</sub> ( $\pi$ )                     | 1.781 | 16.3     | sp <sup>99.99</sup> | 83.7               | sp <sup>99.99</sup> |       |   |
|                                                          | C(H <sub>2</sub> ) <sub>1</sub> -1.070 | B <sub>2</sub> -N <sub>1</sub> ( $\sigma$ )                  | 1.966 | 25.2     | sp <sup>1.69</sup>  | 74.8               | sp <sup>1.43</sup>  | 1.099 |   |
|                                                          | C(H <sub>2</sub> ) <sub>2</sub> -1.051 | B <sub>2</sub> -N <sub>1</sub> ( $\pi$ )                     | 1.745 | 16.0     | sp <sup>99.99</sup> | 84.0               | sp <sup>99.99</sup> |       |   |
|                                                          | C(H <sub>2</sub> ) <sub>3</sub> -1.052 | B <sub>2</sub> -N <sub>2</sub> ( $\sigma$ )                  | 1.966 | 25.7     | sp <sup>1.62</sup>  | 74.3               | sp <sup>1.38</sup>  | 1.164 |   |
|                                                          | P <sub>1</sub> 1.645                   | B <sub>3</sub> -N <sub>2</sub> ( $\sigma$ )                  | 1.966 | 26.0     | sp <sup>1.57</sup>  | 74.0               | sp <sup>1.36</sup>  | 1.201 |   |
|                                                          | P <sub>2</sub> 1.645                   | B <sub>3</sub> -N <sub>2</sub> ( $\pi$ )                     | 1.740 | 18.7     | sp <sup>99.99</sup> | 81.3               | sp <sup>99.99</sup> |       |   |
|                                                          | P <sub>3</sub> 1.643                   | B <sub>3</sub> -N <sub>3</sub> ( $\sigma$ )                  | 1.967 | 25.0     | sp <sup>1.66</sup>  | 75.0               | sp <sup>1.47</sup>  | 1.072 |   |
|                                                          | N <sub>1</sub> -1.341                  | B <sub>1</sub> -C(H <sub>2</sub> ) <sub>3</sub> ( $\sigma$ ) | 1.924 | 26.0     | sp <sup>3.21</sup>  | 74.0               | sp <sup>2.22</sup>  | 0.704 |   |
|                                                          | N <sub>2</sub> -1.260                  | B <sub>2</sub> -C(H <sub>2</sub> ) <sub>2</sub> ( $\sigma$ ) | 1.928 | 26.4     | sp <sup>3.12</sup>  | 73.6               | sp <sup>2.21</sup>  | 0.713 |   |
|                                                          | N <sub>3</sub> -1.381                  | B <sub>3</sub> -C(H <sub>2</sub> ) <sub>1</sub> ( $\sigma$ ) | 1.931 | 25.7     | sp <sup>3.29</sup>  | 74.3               | sp <sup>2.22</sup>  | 0.700 |   |
|                                                          |                                        | P <sub>1</sub> -C(H <sub>2</sub> ) <sub>1</sub> ( $\sigma$ ) | 1.978 | 43.5     | sp <sup>2.32</sup>  | 56.5               | sp <sup>3.24</sup>  | 1.024 |   |
|                                                          |                                        | P <sub>2</sub> -C(H <sub>2</sub> ) <sub>2</sub> ( $\sigma$ ) | 1.971 | 43.1     | sp <sup>2.37</sup>  | 56.9               | sp <sup>3.51</sup>  | 1.014 |   |
|                                                          |                                        | P <sub>3</sub> -C(H <sub>2</sub> ) <sub>3</sub> ( $\sigma$ ) | 1.972 | 43.3     | sp <sup>2.34</sup>  | 56.7               | sp <sup>3.54</sup>  | 1.019 |   |
|                                                          |                                        | N <sub>1</sub> (LP)                                          |       | 1.872    | -                   | sp <sup>5.24</sup> | -                   | -     | - |
|                                                          |                                        | N <sub>2</sub> (LP)                                          |       | 1.871    | -                   | sp <sup>5.22</sup> | -                   | -     | - |
|                                                          |                                        | N <sub>3</sub> (LP)                                          |       | 1.870    | -                   | sp <sup>5.17</sup> | -                   | -     | - |



Table S10: Gas Phase Ground State M05-2X/cc-pVTZ Determined XYZ Coordinates (in Å) for All the Studied Species. Electronic Energies Are Also Given in Hartrees.

| <b>ImMe<sub>2</sub> C<sub>2v</sub></b> |             |             |             |
|----------------------------------------|-------------|-------------|-------------|
| <b>M05-2X= -304.8704604</b>            |             |             |             |
| C                                      | -0.00000500 | -0.97321900 | 0.00000000  |
| C                                      | -0.00000300 | 1.20631500  | 0.67382200  |
| C                                      | -0.00000300 | 1.20631500  | -0.67382200 |
| H                                      | -0.00001300 | 2.01808300  | 1.37515700  |
| H                                      | -0.00001300 | 2.01808300  | -1.37515700 |
| N                                      | -0.00000300 | -0.12043200 | 1.05485000  |
| N                                      | -0.00000300 | -0.12043200 | -1.05485000 |
| C                                      | 0.00000600  | -0.56932200 | 2.42963000  |
| H                                      | -0.00004300 | -1.65192800 | 2.41233400  |
| H                                      | 0.88655000  | -0.21276100 | 2.94804100  |
| H                                      | -0.88648300 | -0.21267500 | 2.94807500  |
| C                                      | 0.00000600  | -0.56932200 | -2.42963000 |
| H                                      | 0.88655000  | -0.21276100 | -2.94804100 |
| H                                      | -0.00004300 | -1.65192800 | -2.41233400 |
| H                                      | -0.88648300 | -0.21267500 | -2.94807500 |

---

| <b>ImMe<sub>2</sub>CH<sub>2</sub> C<sub>2v</sub></b> |             |             |             |
|------------------------------------------------------|-------------|-------------|-------------|
| <b>M05-2X = -344.2017065</b>                         |             |             |             |
| C                                                    | -0.00001100 | -1.54125200 | 0.66984000  |
| C                                                    | -0.00001100 | -1.54125200 | -0.66984000 |
| H                                                    | -0.00001300 | -2.35639200 | 1.36532200  |
| H                                                    | -0.00001300 | -2.35639200 | -1.36532200 |
| N                                                    | -0.00001100 | -0.21756400 | 1.09248300  |
| N                                                    | -0.00001100 | -0.21756400 | -1.09248300 |
| C                                                    | 0.00001000  | 0.26987000  | 2.44048000  |
| H                                                    | -0.88401000 | 0.87981500  | 2.62573300  |
| H                                                    | 0.00000900  | -0.57440300 | 3.12134800  |
| H                                                    | 0.88404200  | 0.87980500  | 2.62571600  |
| C                                                    | 0.00001000  | 0.26987000  | -2.44048000 |
| H                                                    | 0.00000900  | -0.57440300 | -3.12134800 |
| H                                                    | -0.88401000 | 0.87981500  | -2.62573300 |
| H                                                    | 0.88404200  | 0.87980500  | -2.62571600 |
| C                                                    | -0.00000300 | 0.62366700  | 0.00000000  |
| C                                                    | 0.00001900  | 1.97674100  | 0.00000000  |
| H                                                    | 0.00000000  | 2.52119400  | -0.92585200 |
| H                                                    | 0.00000000  | 2.52119400  | 0.92585200  |

---

---

| $\text{Me}_3\text{PCH}_2 C_s$ |             |             |             |
|-------------------------------|-------------|-------------|-------------|
| <b>M05-2X</b> =-500.4034220   |             |             |             |
| P                             | -0.12512900 | 0.00001100  | -0.08571600 |
| C                             | 0.05849300  | -1.46477200 | 0.97233500  |
| H                             | 1.04079500  | -1.48946400 | 1.43597000  |
| H                             | -0.06850900 | -2.34987600 | 0.35415700  |
| H                             | -0.71935900 | -1.44939500 | 1.72826400  |
| C                             | 1.47600300  | -0.00013100 | -1.00670300 |
| H                             | 1.50643600  | -0.88196800 | -1.64151800 |
| H                             | 2.33494900  | -0.00017300 | -0.33817300 |
| H                             | 1.50656500  | 0.88166000  | -1.64157500 |
| C                             | 0.05874300  | 1.46477500  | 0.97232000  |
| H                             | -0.71911100 | 1.44953300  | 1.72825000  |
| H                             | 1.04104900  | 1.48931400  | 1.43595400  |
| C                             | -1.60776400 | 0.00013000  | -0.85889300 |
| H                             | -1.94522000 | 0.92302400  | -1.30207400 |
| H                             | -1.94539400 | -0.92273200 | -1.30200800 |
| H                             | -0.06811800 | 2.34989300  | 0.35413300  |

---

---

|                                               |            |            |             |
|-----------------------------------------------|------------|------------|-------------|
| <b>BN (singlet) <math>C_{\infty v}</math></b> |            |            |             |
| <b>M05-2X = -79.3899541</b>                   |            |            |             |
| B                                             | 0.00000000 | 0.00000000 | -0.73565100 |
| N                                             | 0.00000000 | 0.00000000 | 0.52546500  |

---

---

|                                               |            |            |             |
|-----------------------------------------------|------------|------------|-------------|
| <b>BN (triplet) <math>C_{\infty v}</math></b> |            |            |             |
| <b>M05-2X = -79.4244890</b>                   |            |            |             |
| B                                             | 0.00000000 | 0.00000000 | -0.76690500 |
| N                                             | 0.00000000 | 0.00000000 | 0.54779000  |

---

---

| <b>ImMe<sub>2</sub>·BN C<sub>2v</sub></b> |             |             |             |  |
|-------------------------------------------|-------------|-------------|-------------|--|
| <b>M05-2X = -384.4901216</b>              |             |             |             |  |
| B                                         | 0.00112600  | -1.83909100 | -0.00001300 |  |
| N                                         | 0.00190400  | -3.08769800 | 0.00000200  |  |
| C                                         | 0.00019200  | -0.32251300 | -0.00000200 |  |
| C                                         | -0.67697700 | 1.79593700  | -0.00001400 |  |
| C                                         | 0.67478000  | 1.79675900  | 0.00001100  |  |
| H                                         | -1.37785900 | 2.60660300  | -0.00003200 |  |
| H                                         | 1.37467900  | 2.60827400  | 0.00001900  |  |
| N                                         | -1.07578800 | 0.48169800  | -0.00001000 |  |
| N                                         | 1.07519300  | 0.48300900  | 0.00000300  |  |
| C                                         | -2.44686300 | -0.00266100 | 0.00001300  |  |
| H                                         | -2.40819600 | -1.08728300 | -0.00005500 |  |
| H                                         | -2.95843800 | 0.34967300  | 0.88956400  |  |
| H                                         | -2.95850200 | 0.34978100  | -0.88945900 |  |
| C                                         | 2.44685800  | 0.00031700  | 0.00000200  |  |
| H                                         | 2.95804300  | 0.35335200  | 0.88950000  |  |
| H                                         | 2.40951200  | -1.08435200 | 0.00002400  |  |
| H                                         | 2.9580300   | 0.35330600  | -0.88952200 |  |

---

---

| <b>ImMe<sub>2</sub>CH<sub>2</sub>· BN C<sub>1</sub></b> |             |             |             |
|---------------------------------------------------------|-------------|-------------|-------------|
| <b>M05-2X = -423.7965637</b>                            |             |             |             |
| B                                                       | 2.15726600  | -0.92697300 | -0.10734500 |
| N                                                       | 3.44042800  | -0.86090200 | -1.02777200 |
| C                                                       | -1.27615300 | 1.65111600  | -0.41468200 |
| C                                                       | -2.09949400 | 0.59464500  | -0.54020600 |
| H                                                       | -1.49477100 | 2.66473300  | -0.67877500 |
| H                                                       | -3.09850500 | 0.60697700  | -0.92327100 |
| N                                                       | -0.02100500 | 1.14712300  | 0.15367600  |
| N                                                       | -1.36515000 | -0.57763400 | -0.05114800 |
| C                                                       | 1.16774100  | 1.95474500  | 0.46289600  |
| H                                                       | 2.04561500  | 1.35205400  | 0.35755400  |
| H                                                       | 1.22105800  | 2.78370400  | -0.21156800 |
| H                                                       | 1.10184000  | 2.31628200  | 1.46784200  |
| C                                                       | -1.87879100 | -1.95414900 | -0.00127700 |
| H                                                       | -2.58523000 | -2.10017500 | -0.79158900 |
| H                                                       | -1.06733700 | -2.64206100 | -0.11657700 |
| H                                                       | -2.35770100 | -2.12220800 | 0.94069700  |
| C                                                       | -0.14172400 | -0.17968800 | 0.34423600  |
| C                                                       | 0.81866100  | -0.98830100 | 0.85454700  |
| H                                                       | 0.45426000  | -1.99354300 | 0.89498100  |
| H                                                       | 1.07309100  | -0.66120400 | 1.84105400  |

---

---

| <b>Me<sub>3</sub>PCH<sub>2</sub>· BN C<sub>s</sub></b> |             |             |             |  |
|--------------------------------------------------------|-------------|-------------|-------------|--|
| <b>M05-2X = -580.0255700</b>                           |             |             |             |  |
| B                                                      | 1.94523500  | -0.67611700 | -0.00000400 |  |
| N                                                      | 2.70518000  | 0.31769000  | 0.00000200  |  |
| P                                                      | -0.51565000 | -0.01320300 | 0.00000000  |  |
| C                                                      | -0.22888600 | 0.98888400  | -1.46541600 |  |
| H                                                      | -0.88513800 | 1.85473200  | -1.44564200 |  |
| H                                                      | -0.42741100 | 0.39559000  | -2.35402300 |  |
| H                                                      | 0.82058400  | 1.27806900  | -1.43241900 |  |
| C                                                      | -2.26284800 | -0.50602300 | -0.00000900 |  |
| H                                                      | -2.46904400 | -1.10075300 | -0.88552000 |  |
| H                                                      | -2.90025700 | 0.37369200  | 0.00000100  |  |
| H                                                      | -2.46904700 | -1.10077500 | 0.88548700  |  |
| C                                                      | -0.22889200 | 0.98885600  | 1.46543600  |  |
| H                                                      | -0.88515000 | 1.85470000  | 1.44567800  |  |
| H                                                      | -0.42741400 | 0.39554400  | 2.35403100  |  |
| C                                                      | 0.57592100  | -1.43812700 | -0.00001100 |  |
| H                                                      | 0.38142300  | -2.03780800 | 0.88704600  |  |
| H                                                      | 0.38142600  | -2.03779100 | -0.88708000 |  |
| H                                                      | 0.82057500  | 1.27805000  | 1.43244500  |  |

---



---

| <b>BNBN (singlet) <math>C_s</math></b> |             |             |            |  |
|----------------------------------------|-------------|-------------|------------|--|
| <b>M05-2X = -159.03113210</b>          |             |             |            |  |
| B                                      | -0.14875900 | -2.00519200 | 0.00000000 |  |
| N                                      | 0.33418800  | -0.76360800 | 0.00000000 |  |
| B                                      | 0.00000000  | 0.51117300  | 0.00000000 |  |
| N                                      | -0.22793100 | 1.83076400  | 0.00000000 |  |

---

| <b>BNBN (triplet) <math>C_s</math></b> |             |             |            |  |
|----------------------------------------|-------------|-------------|------------|--|
| <b>M05-2X = -159.10314930</b>          |             |             |            |  |
| B                                      | -0.00676900 | -2.05607100 | 0.00000000 |  |
| N                                      | 0.02585800  | -0.80231300 | 0.00000000 |  |
| B                                      | 0.00000000  | 0.56028900  | 0.00000000 |  |
| N                                      | -0.02102400 | 1.87072900  | 0.00000000 |  |

---

---

| <b>ImMe<sub>2</sub>·BNBN C<sub>2v</sub></b> |             |             |             |
|---------------------------------------------|-------------|-------------|-------------|
| <b>M05-2X = -464.1080049</b>                |             |             |             |
| B                                           | -1.01100900 | 0.00001500  | 0.00000000  |
| N                                           | -2.25066600 | 0.00001500  | 0.00000000  |
| B                                           | -3.65379400 | 0.00001000  | 0.00000000  |
| N                                           | -4.91314000 | 0.00000100  | -0.00000100 |
| C                                           | 0.49864600  | 0.00000200  | -0.00000200 |
| C                                           | 2.60953600  | 0.67684000  | 0.00002200  |
| C                                           | 2.60952500  | -0.67686800 | -0.00002500 |
| H                                           | 3.42154200  | 1.37641800  | 0.00003600  |
| H                                           | 3.42152000  | -1.37645900 | -0.00004200 |
| N                                           | 1.29950400  | 1.07936200  | 0.00004400  |
| N                                           | 1.29948700  | -1.07937000 | -0.00004900 |
| C                                           | 0.82588200  | 2.45717000  | -0.00001600 |
| H                                           | -0.25862400 | 2.44163900  | 0.00075500  |
| H                                           | 1.18450200  | 2.96345600  | 0.88944700  |
| H                                           | 1.18322900  | 2.96298500  | -0.89026300 |
| C                                           | 0.82584100  | -2.45717000 | 0.00002500  |
| H                                           | 1.18307000  | -2.96294700 | 0.89034100  |
| H                                           | -0.25866400 | -2.44161900 | -0.00087800 |
| H                                           | 1.18456200  | -2.96350500 | -0.88936900 |

---

---

| <b>ImMe<sub>2</sub>CH<sub>2</sub>· BNBN C<sub>1</sub></b> |             |             |             |
|-----------------------------------------------------------|-------------|-------------|-------------|
| <b>M05-2X = -503.4346098</b>                              |             |             |             |
| B                                                         | -0.66374500 | -1.96084900 | 0.08929300  |
| N                                                         | -1.54969300 | -1.64144300 | -0.72417900 |
| B                                                         | -2.19058000 | -0.45533900 | -1.20035400 |
| N                                                         | -2.54569700 | 0.74557400  | -1.34587900 |
| C                                                         | 0.26166900  | 1.87690500  | 0.06276300  |
| C                                                         | 1.38566900  | 1.51376100  | -0.58749000 |
| H                                                         | -0.33418000 | 2.76471800  | 0.00494300  |
| H                                                         | 1.99348300  | 2.03996700  | -1.29459600 |
| N                                                         | -0.12405700 | 0.81168500  | 0.83487000  |
| N                                                         | 1.65665500  | 0.21271700  | -0.22008800 |
| C                                                         | -1.39102100 | 0.78155500  | 1.56458200  |
| H                                                         | -1.45364400 | -0.13794000 | 2.13258900  |
| H                                                         | -1.41736900 | 1.63098300  | 2.23837500  |
| H                                                         | -2.17625000 | 0.82924400  | 0.79713400  |
| C                                                         | 2.69728600  | -0.62303700 | -0.79304300 |
| H                                                         | 3.31438900  | 0.00077800  | -1.42730800 |
| H                                                         | 3.31333400  | -1.05156800 | -0.00975800 |
| H                                                         | 2.24939900  | -1.40971200 | -1.39326400 |
| C                                                         | 0.71858300  | -0.19950200 | 1.05985600  |
| C                                                         | 0.50892800  | -1.61734200 | 1.05985600  |
| H                                                         | 1.41407900  | -2.19658600 | 0.91687000  |
| H                                                         | 0.22124500  | -1.68271500 | 2.10520800  |

---

---

| <b>Me<sub>3</sub>PCH<sub>2</sub>·BNBN C<sub>s</sub></b> |             |             |             |  |
|---------------------------------------------------------|-------------|-------------|-------------|--|
| <b>M05-2X = -659.6660397</b>                            |             |             |             |  |
| B                                                       | -0.90537200 | -1.69545700 | -0.00002100 |  |
| N                                                       | -2.04402200 | -1.19040900 | -0.00000800 |  |
| B                                                       | -2.57585400 | 0.13201900  | 0.00000300  |  |
| N                                                       | -2.60779200 | 1.39322600  | 0.00001000  |  |
| P                                                       | 0.97135100  | 0.09612400  | -0.00000500 |  |
| C                                                       | 2.76795600  | 0.32084300  | 0.00000200  |  |
| H                                                       | 2.98683200  | 1.38515600  | 0.00004900  |  |
| H                                                       | 3.19588800  | -0.13495800 | -0.88833000 |  |
| H                                                       | 3.19588500  | -0.13503300 | 0.88829700  |  |
| C                                                       | 0.24118900  | 0.85693800  | -1.44925600 |  |
| H                                                       | 0.33514200  | 0.20707100  | -2.31426600 |  |
| H                                                       | 0.74846600  | 1.80054500  | -1.63552300 |  |
| H                                                       | -0.82098700 | 1.05756700  | -1.19486900 |  |
| C                                                       | 0.24119200  | 0.85689300  | 1.44927500  |  |
| H                                                       | 0.33506600  | 0.20694600  | 2.31423500  |  |
| H                                                       | 0.74852700  | 1.80044800  | 1.63564000  |  |
| C                                                       | 0.63726900  | -1.70204400 | -0.00001300 |  |
| H                                                       | 1.08455600  | -2.14275300 | -0.88777500 |  |
| H                                                       | 1.08452500  | -2.14273800 | 0.88777300  |  |
| H                                                       | -0.82096500 | 1.05759000  | 1.19487400  |  |

---

---

| <b>B<sub>2</sub>N<sub>2</sub> (singlet) D<sub>2h</sub></b> |            |             |             |
|------------------------------------------------------------|------------|-------------|-------------|
| <b>M05-2X=-159.0836566</b>                                 |            |             |             |
| N                                                          | 0.00000000 | 0.00000000  | 1.17746900  |
| N                                                          | 0.00000000 | 0.00000000  | -1.17746900 |
| B                                                          | 0.00000000 | 0.74170900  | 0.00000000  |
| B                                                          | 0.00000000 | -0.74170900 | 0.00000000  |

---

---

---

| <b>B<sub>2</sub>N<sub>2</sub> (triplet) D<sub>2h</sub></b> |             |             |             |
|------------------------------------------------------------|-------------|-------------|-------------|
| <b>M05-2X=-159.1046768</b>                                 |             |             |             |
| N                                                          | 1.17737800  | -0.00000300 | 0.00000200  |
| N                                                          | -1.17737900 | -0.00000100 | 0.00000200  |
| B                                                          | 0.00000300  | 0.79744800  | -0.00000300 |
| B                                                          | -0.00000100 | -0.79744100 | -0.00000300 |

---

---

---

| <b>ImMe<sub>2</sub>·B<sub>2</sub>N<sub>2</sub> C<sub>2v</sub></b> |             |             |             |
|-------------------------------------------------------------------|-------------|-------------|-------------|
| <b>M05-2X = -464.1424308</b>                                      |             |             |             |
| N                                                                 | 2.31469300  | -1.20050300 | -0.00045100 |
| N                                                                 | 2.31509500  | 1.20010800  | 0.00038400  |
| B                                                                 | 1.43148000  | -0.00011600 | 0.00003500  |
| B                                                                 | 2.97635500  | -0.00028500 | -0.00005900 |
| C                                                                 | -0.12882500 | -0.00000200 | 0.00007900  |
| C                                                                 | -2.23460000 | -0.67771900 | -0.00001200 |
| C                                                                 | -2.23446400 | 0.67818100  | -0.00011300 |
| H                                                                 | -3.04411500 | -1.38016500 | 0.00001300  |
| H                                                                 | -3.04380500 | 1.38082800  | -0.00024700 |
| N                                                                 | -0.92709500 | -1.07557500 | 0.00009200  |
| N                                                                 | -0.92686000 | 1.07573200  | -0.00004700 |
| C                                                                 | -0.46955300 | -2.46497700 | 0.00015400  |
| H                                                                 | 0.61768800  | -2.45250500 | 0.00003700  |
| H                                                                 | -0.85024700 | -2.95659300 | 0.88919400  |
| H                                                                 | -0.85042200 | -2.95671900 | -0.88873900 |
| C                                                                 | -0.46893400 | 2.46502100  | -0.00007300 |
| H                                                                 | -0.84952600 | 2.95679100  | 0.88893300  |
| H                                                                 | 0.61832500  | 2.45220100  | -0.00011400 |
| H                                                                 | -0.84965200 | 2.95680200  | -0.88901600 |

---

---

| <b>ImMe<sub>2</sub>CH<sub>2</sub>·B<sub>2</sub>N<sub>2</sub> C<sub>s</sub></b> |             |             |             |
|--------------------------------------------------------------------------------|-------------|-------------|-------------|
| <b>M05-2X= -503.4583931</b>                                                    |             |             |             |
| N                                                                              | 2.26958100  | -1.20178900 | 0.51897800  |
| N                                                                              | 2.26956200  | 1.20179400  | 0.51897400  |
| B                                                                              | 1.81790400  | 0.00000900  | -0.24832100 |
| B                                                                              | 2.61608200  | 0.00000200  | 1.07907100  |
| C                                                                              | -2.12170400 | -0.67544900 | 0.73444500  |
| C                                                                              | -2.12170200 | 0.67543500  | 0.73445800  |
| H                                                                              | -2.74150000 | -1.37884300 | 1.25228300  |
| H                                                                              | -2.74149900 | 1.37882400  | 1.25230100  |
| N                                                                              | -1.10556500 | -1.07824700 | -0.09979900 |
| N                                                                              | -1.10556200 | 1.07824100  | -0.09978000 |
| C                                                                              | -0.61789200 | -2.44393700 | -0.28025400 |
| H                                                                              | 0.43243900  | -2.46317700 | 0.01256900  |
| H                                                                              | -1.20459200 | -3.09040100 | 0.36089900  |
| H                                                                              | -0.74666200 | -2.74628800 | -1.31474100 |
| C                                                                              | -0.61790800 | 2.44393600  | -0.28025300 |
| H                                                                              | -1.20464500 | 3.09040700  | 0.36085800  |
| H                                                                              | 0.43241500  | 2.46320200  | 0.01259900  |
| H                                                                              | -0.74664900 | 2.74625300  | -1.31475500 |
| C                                                                              | -0.49886700 | 0.00000100  | -0.59964800 |
| C                                                                              | 0.72637400  | 0.00000700  | -1.40918000 |
| H                                                                              | 0.78241500  | 0.89354200  | -2.02089000 |
| H                                                                              | 0.78242300  | -0.89352300 | -2.02089600 |

---



---

| $\text{Me}_3\text{PCH}_2 \cdot \text{B}_2\text{N}_2 C_s$ |             |             |             |
|----------------------------------------------------------|-------------|-------------|-------------|
| <b>M05-2X = -659.6811466</b>                             |             |             |             |
| N                                                        | -3.04025700 | -0.90284600 | -0.00000400 |
| N                                                        | -1.71941700 | 1.10989700  | 0.00000300  |
| B                                                        | -1.65993800 | -0.43900400 | -0.00000200 |
| B                                                        | -2.91804000 | 0.46821800  | 0.00000100  |
| P                                                        | 1.05778100  | -0.04490500 | -0.00000100 |
| C                                                        | 2.64881700  | -0.91137900 | -0.00000200 |
| H                                                        | 3.46238300  | -0.19125300 | 0.00001400  |
| H                                                        | 2.72021800  | -1.53668600 | -0.88551200 |
| H                                                        | 2.72020500  | -1.53668600 | 0.88549100  |
| C                                                        | 0.98957200  | 0.98605500  | -1.47003100 |
| H                                                        | 1.04995300  | 0.35609500  | -2.35357000 |
| H                                                        | 1.81824800  | 1.68889100  | -1.46092100 |
| H                                                        | 0.02706900  | 1.49523100  | -1.42461200 |
| C                                                        | 0.98957200  | 0.98604900  | 1.47003400  |
| H                                                        | 1.04995500  | 0.35608400  | 2.35357100  |
| H                                                        | 1.81824800  | 1.68888500  | 1.46092600  |
| C                                                        | -0.28344800 | -1.22886700 | 0.00000000  |
| H                                                        | -0.20977200 | -1.86438900 | -0.88082800 |
| H                                                        | -0.20977300 | -1.86437900 | 0.88083600  |
| H                                                        | 0.02706900  | 1.49522500  | 1.42461800  |

---

---

$(\text{ImMe}_2)_2\cdot\text{B}_2\text{N}_2$   $C_{2v}$   
**M05-2X** = -769.0983332

---

|   |             |             |             |
|---|-------------|-------------|-------------|
| N | -0.00012100 | 1.17474800  | 0.82521300  |
| N | 0.00012100  | -1.17474300 | 0.82521800  |
| B | 0.83288500  | 0.00007600  | 0.67676200  |
| B | -0.83288400 | -0.00007200 | 0.67675900  |
| C | 2.33791800  | 0.00018300  | 0.11821500  |
| C | 4.34045600  | 0.67737700  | -0.56790900 |
| C | 4.34085100  | -0.67675600 | -0.56700700 |
| H | 5.10460300  | 1.38064500  | -0.83327700 |
| H | 5.10541500  | -1.37992900 | -0.83142500 |
| N | 3.09905000  | 1.07199000  | -0.14201400 |
| N | 3.09967100  | -1.07152500 | -0.14060300 |
| C | 2.65060400  | 2.45175800  | 0.01821600  |
| H | 1.59744700  | 2.40783500  | 0.30280000  |
| H | 3.24552500  | 2.93201400  | 0.78913200  |
| H | 2.77867700  | 2.97397100  | -0.92510800 |
| C | 2.65204700  | -2.45134400 | 0.02148800  |
| H | 3.24732800  | -2.93022400 | 0.79298300  |
| H | 1.59888000  | -2.40768900 | 0.30604800  |
| H | 2.78034300  | -2.97473100 | -0.92115400 |
| C | -2.33791800 | -0.00018200 | 0.11821300  |
| C | -4.34085300 | 0.67675300  | -0.56700500 |
| C | -4.34045700 | -0.67738000 | -0.56790400 |
| H | -5.10541900 | 1.37992400  | -0.83142100 |
| H | -5.10460400 | -1.38064900 | -0.83326900 |
| N | -3.09967300 | 1.07152400  | -0.14060500 |
| N | -3.09904900 | -1.07199100 | -0.14201300 |
| C | -2.65205100 | 2.45134300  | 0.02148500  |
| H | -1.59888300 | 2.40769100  | 0.30604000  |
| H | -2.78035200 | 2.97473100  | -0.92115700 |
| H | -3.24733000 | 2.93022200  | 0.79298300  |
| C | -2.65059800 | -2.45175700 | 0.01821300  |
| H | -2.77865800 | -2.97396600 | -0.92511600 |
| H | -1.59744400 | -2.40783200 | 0.30280800  |
| H | -3.24552700 | -2.93202200 | 0.78911900  |

---

---

(ImMe<sub>2</sub>CH<sub>2</sub>)<sub>2</sub> · B<sub>2</sub>N<sub>2</sub> C<sub>2</sub>  
M05-2X = -847.7155778

---

|   |             |             |             |
|---|-------------|-------------|-------------|
| N | -0.56020900 | -2.04895100 | -1.03785800 |
| N | 0.56019500  | -2.04903600 | 1.03777400  |
| B | 0.73249000  | -1.98315500 | -0.40715700 |
| B | -0.73250020 | -1.98316700 | 0.40707800  |
| C | 1.68926500  | 2.03364900  | -0.55347600 |
| C | 2.41333700  | 1.69536600  | 0.53427400  |
| H | 1.26985300  | 2.97147300  | -0.85645100 |
| H | 2.74653400  | 2.28157600  | 1.36685100  |
| N | 1.55595000  | 0.89536400  | -1.31895200 |
| N | 2.71873400  | 0.35688200  | 0.41909800  |
| C | 0.72079400  | 0.71783100  | -2.50045100 |
| H | 0.08793500  | -0.15869000 | -2.33140800 |
| H | 0.11241800  | 1.60830300  | -2.61298900 |
| H | 1.34271000  | 0.58749300  | -3.38183800 |
| C | 3.29727700  | -0.50048100 | 1.44828700  |
| H | 3.51233300  | 0.11779700  | 2.31260600  |
| H | 2.54958000  | -1.26258000 | 1.68587400  |
| H | 4.21996800  | -0.94150700 | 1.08244500  |
| C | 2.19079000  | -0.12039100 | -0.71517100 |
| C | 2.15139200  | -1.49938100 | -1.13262600 |
| H | 2.97781900  | -2.06697400 | -0.72062200 |
| H | 2.08357000  | -1.60307700 | -2.20901800 |
| C | -2.41334200 | 1.69538900  | -0.53421200 |
| C | -1.68924800 | 2.03363200  | 0.55353500  |
| H | -2.74654900 | 2.28162700  | -1.36676500 |
| H | -1.26982400 | 2.97144400  | 0.85653300  |
| N | -2.71875400 | 0.35690500  | -0.41906900 |
| N | -1.55593200 | 0.89532300  | 1.31897600  |
| C | -3.29730500 | -0.50042400 | -1.44828200 |
| H | -4.21997100 | -0.94149500 | -1.08243000 |
| H | -3.51241100 | 0.11789000  | -2.31256200 |
| H | -2.54959500 | -1.26249200 | -1.68592700 |
| C | -0.72075500 | 0.71774900  | 2.50045300  |
| H | -0.11235700 | 1.60820500  | 2.61299400  |
| H | -1.34265400 | 0.58740600  | 3.38185200  |
| H | -0.08791800 | -0.15878200 | 2.33138100  |
| C | -2.19079200 | -0.12040800 | 0.71517500  |
| C | -2.15139300 | -1.49941100 | 1.13258500  |
| H | -2.97782700 | -2.06699000 | 0.72057600  |
| H | -2.08354900 | -1.60314500 | 2.20897100  |

---

---

---

| $(\text{Me}_3\text{PCH}_2)_2 \cdot \text{B}_2\text{N}_2 \text{C}_2$ |             |             |             |
|---------------------------------------------------------------------|-------------|-------------|-------------|
| M05-2X = -1160.1654385                                              |             |             |             |
| N                                                                   | 0.63123900  | -0.98919900 | -0.35818800 |
| N                                                                   | -0.63123800 | 0.98918700  | -0.35820700 |
| B                                                                   | -0.71011400 | -0.46418500 | -0.26669200 |
| B                                                                   | 0.71011300  | 0.46417500  | -0.26670400 |
| P                                                                   | -3.38803100 | -0.04315200 | 0.07223200  |
| C                                                                   | -5.03133200 | -0.77955700 | 0.32320200  |
| H                                                                   | -5.79208800 | -0.00309800 | 0.32733500  |
| H                                                                   | -5.04936200 | -1.30852300 | 1.27199100  |
| H                                                                   | -5.23732300 | -1.48276700 | -0.47896300 |
| C                                                                   | -3.12352400 | 1.13484500  | 1.40411500  |
| H                                                                   | -3.09876400 | 0.60681500  | 2.35390300  |
| H                                                                   | -3.92040400 | 1.87408400  | 1.40951200  |
| H                                                                   | -2.14774500 | 1.57112600  | 1.16955200  |
| C                                                                   | -3.43817600 | 0.84699400  | -1.48939500 |
| H                                                                   | -3.59429400 | 0.14073000  | -2.30077900 |
| H                                                                   | -4.24270200 | 1.57763100  | -1.47304600 |
| C                                                                   | -2.10545000 | -1.27146000 | 0.05230200  |
| H                                                                   | -2.05661100 | -1.77324100 | 1.01733100  |
| H                                                                   | -2.31304000 | -2.01235600 | -0.71845900 |
| H                                                                   | -2.45125300 | 1.31193700  | -1.56237000 |
| P                                                                   | 3.38803100  | 0.04315600  | 0.07223000  |
| C                                                                   | 5.03133700  | 0.77955900  | 0.32317400  |
| H                                                                   | 5.79209000  | 0.00309700  | 0.32730300  |
| H                                                                   | 5.04938500  | 1.30853500  | 1.27195600  |
| H                                                                   | 5.23731800  | 1.48276000  | -0.47900200 |
| C                                                                   | 3.12350300  | -1.13477300 | 1.40417000  |
| H                                                                   | 3.09868400  | -0.60668300 | 2.35392500  |
| H                                                                   | 3.92040200  | -1.87398900 | 1.40965100  |
| H                                                                   | 2.14774300  | -1.57109100 | 1.16959800  |
| C                                                                   | 3.43818500  | -0.84706700 | -1.48935200 |
| H                                                                   | 3.59437600  | -0.14085400 | -2.30076700 |
| H                                                                   | 4.24267400  | -1.57774500 | -1.47293300 |
| C                                                                   | 2.10545600  | 1.27146800  | 0.05224000  |
| H                                                                   | 2.05663000  | 1.77330400  | 1.01724200  |
| H                                                                   | 2.31303700  | 2.01231700  | -0.71856700 |
| H                                                                   | 2.45124400  | -1.31196900 | -1.56233600 |

---

---

| $\mathbf{B}_3\mathbf{N}_3 D_{3h}$ |             |             |            |
|-----------------------------------|-------------|-------------|------------|
| <b>M05-2X= -238.9225916</b>       |             |             |            |
| B                                 | 0.00000000  | 1.10276700  | 0.00000000 |
| B                                 | 0.95502400  | -0.55138300 | 0.00000000 |
| B                                 | -0.95502400 | -0.55138300 | 0.00000000 |
| N                                 | 1.30833000  | 0.75536500  | 0.00000000 |
| N                                 | 0.00000000  | -1.51072900 | 0.00000000 |
| N                                 | -1.30833000 | 0.75536500  | 0.00000000 |

---

---

| <b>ImMe<sub>2</sub>· B<sub>3</sub>N<sub>3</sub> C<sub>1</sub></b> |             |             |             |
|-------------------------------------------------------------------|-------------|-------------|-------------|
| <b>M05-2X = -543.9069996</b>                                      |             |             |             |
| B                                                                 | 2.87899000  | 0.90586600  | 0.06433100  |
| B                                                                 | 0.96258600  | -0.03828100 | -0.00159400 |
| B                                                                 | 2.89284700  | -0.95780200 | -0.06171200 |
| N                                                                 | 1.59585000  | 1.26584800  | 0.08631700  |
| N                                                                 | 1.61444400  | -1.33387300 | -0.08795100 |
| N                                                                 | 3.86703900  | -0.01895400 | 0.00287300  |
| C                                                                 | -0.64905100 | -0.01660200 | -0.00267000 |
| N                                                                 | -1.50065200 | -1.05691100 | 0.01205800  |
| N                                                                 | -1.41991400 | 1.08690300  | -0.01603300 |
| C                                                                 | -2.79495500 | -0.61223700 | 0.01001200  |
| C                                                                 | -1.15114900 | -2.47519300 | 0.03929600  |
| C                                                                 | -2.74351300 | 0.73786100  | -0.00873800 |
| C                                                                 | -0.96674300 | 2.47686000  | -0.03728300 |
| H                                                                 | -3.62794900 | -1.28644100 | 0.02077200  |
| H                                                                 | -0.07281200 | -2.55381400 | -0.02355800 |
| H                                                                 | -1.51536000 | -2.90719600 | 0.96611500  |
| H                                                                 | -1.62451900 | -2.96399500 | -0.80614900 |
| H                                                                 | -3.52473100 | 1.47105700  | -0.01940000 |
| H                                                                 | -0.40272100 | 2.69239900  | 0.85972700  |
| H                                                                 | -0.31553300 | 2.63593100  | -0.88527900 |
| H                                                                 | -1.85339000 | 3.09791200  | -0.10190100 |

---

---

| <b>ImMe<sub>2</sub>CH<sub>2</sub>· B<sub>3</sub>N<sub>3</sub> C<sub>1</sub></b> |             |             |             |
|---------------------------------------------------------------------------------|-------------|-------------|-------------|
| <b>M05-2X = -583.2215575</b>                                                    |             |             |             |
| B                                                                               | 3.13834300  | -0.05473400 | 1.06073100  |
| B                                                                               | 1.43181700  | -0.72624600 | -0.06490300 |
| B                                                                               | 3.35266400  | -0.11946800 | -0.80516900 |
| N                                                                               | 1.87970900  | -0.45363400 | 1.31105300  |
| N                                                                               | 2.19500300  | -0.53920700 | -1.30608200 |
| N                                                                               | 4.17197400  | 0.24547300  | 0.22930100  |
| C                                                                               | -0.10295300 | -1.25065000 | -0.23428600 |
| C                                                                               | -1.15315900 | -0.21321600 | -0.08326300 |
| H                                                                               | -0.20550800 | -1.70177400 | -1.25597200 |
| N                                                                               | -2.47105900 | -0.48821300 | 0.04816800  |
| N                                                                               | -1.04538800 | 1.12044800  | -0.08654900 |
| C                                                                               | -3.19887300 | 0.67751900  | 0.13303800  |
| C                                                                               | -3.01680500 | -1.83370400 | 0.08438300  |
| C                                                                               | -2.30164700 | 1.68546600  | 0.04641300  |
| C                                                                               | 0.19261000  | 1.90669300  | -0.19506400 |
| H                                                                               | -4.27193100 | 0.68636800  | 0.23529000  |
| H                                                                               | -2.78987300 | -2.31157600 | 1.03868600  |
| H                                                                               | -4.09548200 | -1.76217600 | -0.04421200 |
| H                                                                               | -2.58337100 | -2.41947500 | -0.72700900 |
| H                                                                               | -2.44149200 | 2.74775900  | 0.07212000  |
| H                                                                               | -0.09414600 | 2.94925300  | -0.34158700 |
| H                                                                               | 0.77287800  | 1.78552500  | 0.71942400  |
| H                                                                               | 0.77109200  | 1.54412000  | -1.04499700 |
| H                                                                               | -0.30300300 | -2.04251000 | 0.51639800  |

---

---

| $\text{Me}_3\text{PCH}_2\cdot\text{B}_3\text{N}_3 C_1$ |             |             |             |
|--------------------------------------------------------|-------------|-------------|-------------|
| <b>M05-2X = -739.4419961</b>                           |             |             |             |
| B                                                      | 2.52776900  | -1.07349800 | -0.00000200 |
| B                                                      | 3.27844400  | 0.63768700  | 0.00000700  |
| B                                                      | 1.14569500  | 0.56984800  | -0.00001300 |
| N                                                      | 3.80033800  | -0.61933300 | 0.00001100  |
| N                                                      | 2.26091000  | 1.49168700  | -0.00000100 |
| N                                                      | 1.20186800  | -0.90504700 | -0.00001500 |
| C                                                      | -0.34150000 | 1.24020300  | -0.00002500 |
| P                                                      | -1.62742700 | 0.01310800  | 0.00000100  |
| H                                                      | -0.46251100 | 1.87296600  | -0.87879600 |
| C                                                      | -3.25899400 | 0.80382200  | 0.00000800  |
| C                                                      | -1.55731100 | -1.02160000 | -1.47130500 |
| C                                                      | -1.55728500 | -1.02157000 | 1.47132700  |
| H                                                      | -4.04119900 | 0.04953200  | 0.00006100  |
| H                                                      | -3.35645200 | 1.42668300  | -0.88470800 |
| H                                                      | -3.35640800 | 1.42675900  | 0.88467500  |
| H                                                      | -1.63257300 | -0.38856500 | -2.35155100 |
| H                                                      | -2.38082700 | -1.73031100 | -1.45843000 |
| H                                                      | -0.59680700 | -1.52718900 | -1.45341000 |
| H                                                      | -1.63256300 | -0.38852300 | 2.35156300  |
| H                                                      | -2.38078300 | -1.73030300 | 1.458463000 |
| H                                                      | -0.59676900 | -1.52713800 | 1.45344100  |
| H                                                      | -0.46251000 | 1.87300600  | 0.87871800  |

---



---

| $(\text{ImMe}_2)_2 \cdot \text{B}_3\text{N}_3 C_2$ |             |             |             |
|----------------------------------------------------|-------------|-------------|-------------|
| <b>M05-2X = -848.8593821</b>                       |             |             |             |
| B                                                  | -1.18830300 | -0.71761000 | -0.01390700 |
| B                                                  | 1.18830100  | -0.71761500 | 0.01394000  |
| B                                                  | -0.00000300 | -2.41957000 | 0.00004200  |
| N                                                  | 0.00000100  | 0.06042000  | 0.00000600  |
| N                                                  | 1.30821900  | -2.16210100 | -0.00142600 |
| N                                                  | -1.30822400 | -2.16209600 | 0.00150100  |
| C                                                  | 2.61637100  | 0.05063500  | 0.06424800  |
| N                                                  | 3.81068400  | -0.47625500 | -0.25902700 |
| N                                                  | 2.87209500  | 1.31067900  | 0.45635300  |
| C                                                  | 4.80651700  | 0.44722300  | -0.06925000 |
| C                                                  | 4.05148100  | -1.83368300 | -0.73968700 |
| C                                                  | 4.21598900  | 1.57419300  | 0.38470600  |
| C                                                  | 1.87536600  | 2.26155300  | 0.92939000  |
| H                                                  | 5.83461700  | 0.22586600  | -0.27489100 |
| H                                                  | 3.87739800  | -2.54144200 | 0.05988000  |
| H                                                  | 3.35571200  | -2.06338200 | -1.53460400 |
| H                                                  | 5.07742900  | -1.87316800 | -1.09097700 |
| H                                                  | 4.62762200  | 2.52504900  | 0.65852000  |
| H                                                  | 1.91382700  | 3.15311600  | 0.30993000  |
| H                                                  | 0.90806300  | 1.77126400  | 0.83637900  |
| H                                                  | 2.09266300  | 2.52214800  | 1.96109900  |
| C                                                  | -2.61637000 | 0.05064300  | -0.06424600 |
| N                                                  | -2.87208100 | 1.31069100  | -0.45634700 |
| N                                                  | -3.81069400 | -0.47624900 | 0.25898800  |
| C                                                  | -4.21597700 | 1.57420600  | -0.38473800 |
| C                                                  | -1.87533800 | 2.26157500  | -0.92933200 |
| C                                                  | -4.80652000 | 0.44723100  | 0.06918800  |
| C                                                  | -4.05151300 | -1.83368200 | 0.73962400  |
| H                                                  | -4.62760000 | 2.52506600  | -0.65855400 |
| H                                                  | -0.90805000 | 1.77123500  | -0.83642400 |
| H                                                  | -2.09268500 | 2.52229400  | -1.96099900 |
| H                                                  | -1.91372000 | 3.15307000  | -0.30977100 |
| H                                                  | -5.83462700 | 0.22587200  | 0.27479300  |
| H                                                  | -3.87741700 | -2.54143200 | -0.05994900 |
| H                                                  | -3.35576300 | -2.06339800 | 1.53455300  |
| H                                                  | -5.07747000 | -1.87316400 | 1.09088900  |

---

---

(ImMe<sub>2</sub>CH<sub>2</sub>)<sub>2</sub>·B<sub>3</sub>N<sub>3</sub> C<sub>2</sub>  
M05-2X =-927.4820433

---

|   |             |             |             |
|---|-------------|-------------|-------------|
| B | -0.94826600 | -0.29780000 | 0.71758800  |
| B | 0.94828200  | -0.29779900 | -0.71761400 |
| B | 0.00001100  | -2.00187500 | -0.00001100 |
| N | 0.00000500  | 0.48227600  | -0.00001600 |
| N | 1.05555800  | -1.75024700 | -0.77755800 |
| N | -1.05553400 | -1.75025000 | 0.77753800  |
| C | 2.20529400  | 0.50675900  | -1.47358900 |
| C | 3.25881200  | 0.38224100  | -0.48732800 |
| H | 2.47347100  | 0.00562000  | -2.39657100 |
| N | 4.14858900  | -0.61341100 | -0.38745300 |
| N | 3.42882100  | 1.17180500  | 0.58224900  |
| C | 4.88556700  | -0.45480200 | 0.76581300  |
| C | 4.20492600  | -1.74695700 | -1.30157700 |
| C | 4.43709600  | 0.66309700  | 1.37163400  |
| C | 2.57044900  | 2.30827100  | 0.88815700  |
| H | 5.64693100  | -1.15192900 | 1.05106200  |
| H | 4.58948300  | -1.42495600 | -2.26529500 |
| H | 4.87343800  | -2.48482500 | -0.87353700 |
| H | 3.19763700  | -2.15046200 | -1.39143300 |
| H | 4.73167000  | 1.13365300  | 2.28753900  |
| H | 2.71527100  | 2.56355800  | 1.93167200  |
| H | 2.84107800  | 3.15680200  | 0.26520100  |
| H | 1.53601000  | 2.00446200  | 0.71237400  |
| H | 1.94453800  | 1.54532700  | -1.64261400 |
| C | -2.20527500 | 0.50674700  | 1.47357500  |
| C | -3.25881100 | 0.38223100  | 0.48733100  |
| H | -2.47343500 | 0.00560300  | 2.39655900  |
| N | -4.14858400 | -0.61342400 | 0.38745900  |
| N | -3.42883900 | 1.17180600  | -0.58223500 |
| C | -4.88558600 | -0.45480300 | -0.76579000 |
| C | -4.20490700 | -1.74697900 | 1.30157600  |
| C | -4.43712800 | 0.66310300  | -1.37160700 |
| C | -2.57047300 | 2.30827100  | -0.88815200 |
| H | -5.64695800 | -1.15192600 | -1.05103000 |
| H | -4.58953100 | -1.42500400 | 2.26527600  |
| H | -4.87335700 | -2.48488000 | 0.87349600  |
| H | -3.19760300 | -2.15043700 | 1.39146700  |
| H | -4.73171600 | 1.13366600  | -2.28750400 |
| H | -2.71536000 | 2.56360500  | -1.93164500 |
| H | -2.84104900 | 3.15678000  | -0.26514200 |
| H | -1.53602500 | 2.00444900  | -0.71243600 |
| H | -1.94452600 | 1.54531700  | 1.64260000  |

---

---

| $(\text{Me}_3\text{PCH}_2)_2\cdot\text{B}_3\text{N}_3 \ C_1$ |             |             |             |
|--------------------------------------------------------------|-------------|-------------|-------------|
| <b>M05-2X</b> = -1239.9224708                                |             |             |             |
| B                                                            | 0.40891296  | 2.41675797  | 0.01937519  |
| B                                                            | -1.37454800 | 1.37225691  | -0.03369784 |
| B                                                            | 0.79179803  | 0.35852799  | -0.03499592 |
| N                                                            | -0.87806405 | 2.73485293  | 0.01074123  |
| N                                                            | -0.60952296 | 0.16216994  | -0.05493891 |
| N                                                            | 1.50294199  | 1.63809401  | 0.01325614  |
| C                                                            | 1.77072908  | -0.97561698 | -0.07119100 |
| P                                                            | 3.47439706  | -0.48902892 | 0.00113300  |
| H                                                            | 1.61329608  | -1.54290394 | -0.98842503 |
| C                                                            | 4.56343311  | -1.94675189 | -0.02194109 |
| C                                                            | 3.96598401  | 0.50323617  | -1.42021496 |
| C                                                            | 3.86956305  | 0.38333401  | 1.52617204  |
| H                                                            | 5.60485110  | -1.63938685 | 0.02859691  |
| H                                                            | 4.39621112  | -2.50662884 | -0.93783812 |
| H                                                            | 4.33287114  | -2.58229994 | 0.82858688  |
| H                                                            | 3.75414501  | -0.05650179 | -2.32760098 |
| H                                                            | 5.02977700  | 0.71824420  | -1.36219996 |
| H                                                            | 3.36543598  | 1.40716214  | -1.38440090 |
| H                                                            | 3.60411909  | -0.24908804 | 2.36955301  |
| H                                                            | 4.93369504  | 0.60268805  | 1.55386704  |
| H                                                            | 3.26879602  | 1.28777899  | 1.52714509  |
| H                                                            | 1.56430811  | -1.63412803 | 0.77235997  |
| C                                                            | -3.02293600 | 1.23858085  | -0.05912982 |
| P                                                            | -3.49416394 | -0.46477916 | 0.00281610  |
| H                                                            | -3.42271403 | 1.68309889  | -0.96999379 |
| C                                                            | -5.30342793 | -0.65659023 | 0.03135211  |
| C                                                            | -2.92348593 | -1.37046007 | -1.44488096 |
| C                                                            | -2.88765089 | -1.26757622 | 1.49562705  |
| H                                                            | -5.57123790 | -1.70967324 | 0.06516006  |
| H                                                            | -5.72643896 | -0.20420120 | -0.86114086 |
| H                                                            | -5.70475894 | -0.15313729 | 0.90637414  |
| H                                                            | -3.34702596 | -0.91483304 | -2.33612893 |
| H                                                            | -3.23570089 | -2.40936009 | -1.37771001 |
| H                                                            | -1.84065593 | -1.26315103 | -1.43337397 |
| H                                                            | -3.27473490 | -0.73851628 | 2.36262508  |
| H                                                            | -3.21551186 | -2.30349623 | 1.51884800  |
| H                                                            | -1.80463790 | -1.17809818 | 1.44365704  |
| H                                                            | -3.45913601 | 1.76108680  | 0.79122621  |

---

---

(ImMe<sub>2</sub>CH<sub>2</sub>)<sub>3</sub>·B<sub>3</sub>N<sub>3</sub> C<sub>1</sub>  
M05-2X = -1271.7042346

---

|   |             |             |             |
|---|-------------|-------------|-------------|
| B | -1.43559600 | 0.03283800  | 0.54323100  |
| B | 0.09907700  | 0.98757900  | -0.90150700 |
| B | 0.11392100  | -1.28625600 | -0.54079500 |
| N | -1.01543200 | 1.24337200  | -0.06085400 |
| N | 0.77188800  | -0.22085400 | -1.20587800 |
| N | -0.94578900 | -1.29189700 | 0.39364800  |
| C | 0.81673300  | 2.41099000  | -1.55881800 |
| C | 1.58269100  | 2.86349900  | -0.43313100 |
| H | 1.44146900  | 2.14255200  | -2.40171800 |
| N | 2.81107300  | 2.43743400  | -0.08989200 |
| N | 1.16695100  | 3.67675300  | 0.55156600  |
| C | 3.16342700  | 2.97666900  | 1.12970900  |
| C | 3.53907100  | 1.43200600  | -0.84498600 |
| C | 2.13486100  | 3.74895300  | 1.53056200  |
| C | -0.17639200 | 4.23118000  | 0.61603400  |
| H | 4.10188400  | 2.75688400  | 1.59669200  |
| H | 3.97476600  | 1.87462400  | -1.73810600 |
| H | 4.32678700  | 1.04140000  | -0.20940000 |
| H | 2.82789600  | 0.64154800  | -1.10250800 |
| H | 1.99919600  | 4.33310300  | 2.41795300  |
| H | -0.30874000 | 4.67169500  | 1.59807300  |
| H | -0.29749000 | 4.99823800  | -0.14500800 |
| H | -0.86892500 | 3.39883800  | 0.46394100  |
| H | 0.03645000  | 3.11253500  | -1.82679700 |
| C | -2.85173200 | 0.15650000  | 1.50678600  |
| C | -3.85375200 | -0.19726700 | 0.53834800  |
| H | -2.80545000 | -0.55973500 | 2.31815800  |
| N | -4.28472500 | -1.43492800 | 0.24701400  |
| N | -4.43226400 | 0.63359500  | -0.34507100 |
| C | -5.13101800 | -1.38427200 | -0.83981500 |
| C | -3.77879500 | -2.63273500 | 0.90034800  |
| C | -5.22458400 | -0.09186900 | -1.20934400 |
| C | -4.11801400 | 2.05097900  | -0.43390000 |
| H | -5.57582500 | -2.26705400 | -1.25198100 |
| H | -4.17423000 | -2.69877100 | 1.91115900  |
| H | -4.11009900 | -3.49049700 | 0.32551000  |
| H | -2.68736200 | -2.56162300 | 0.89786700  |
| H | -5.76750800 | 0.37461100  | -2.00601200 |
| H | -4.50002000 | 2.41917900  | -2.00601200 |

---

---

| $(\text{ImMe}_2\text{CH}_2)_3 \cdot \text{B}_3\text{N}_3$ (cont'd.) |             |             |             |
|---------------------------------------------------------------------|-------------|-------------|-------------|
| H                                                                   | -4.59189800 | 2.58962200  | 0.38342700  |
| H                                                                   | -3.02944900 | 2.14847200  | -0.39443300 |
| H                                                                   | -2.96818600 | 1.17459800  | 1.85836500  |
| C                                                                   | 0.78750300  | -2.85053500 | -0.85727700 |
| C                                                                   | 2.07238600  | -2.71550600 | -0.24701600 |
| H                                                                   | 0.16331000  | -3.58655900 | -0.36748900 |
| N                                                                   | 3.20807500  | -2.31310600 | -0.84098900 |
| N                                                                   | 2.33647300  | -2.82021100 | 1.06782200  |
| C                                                                   | 4.19318800  | -2.14985300 | 0.11156000  |
| C                                                                   | 3.28161300  | -1.95699100 | -2.24877400 |
| C                                                                   | 3.64902900  | -2.46810800 | 1.30284000  |
| C                                                                   | 1.31326400  | -3.11134000 | 2.06027500  |
| H                                                                   | 5.18326800  | -1.83150100 | -0.14575400 |
| H                                                                   | 2.46361200  | -1.26215300 | -2.44686600 |
| H                                                                   | 4.24119200  | -1.48280300 | -2.42616600 |
| H                                                                   | 3.20254100  | -2.84960900 | -2.86397900 |
| H                                                                   | 4.07063100  | -2.47864900 | 2.28753200  |
| H                                                                   | 1.68101900  | -2.78823900 | 3.02778900  |
| H                                                                   | 0.41139800  | -2.55420100 | 1.79323100  |
| H                                                                   | 1.10976400  | -4.17915200 | 2.08660700  |
| H                                                                   | 0.85236000  | -3.00304000 | -1.92711700 |

---

---

| $(\text{Me}_3\text{PCH}_2)_3 \cdot \text{B}_3\text{N}_3 C_1$ |             |             |             |
|--------------------------------------------------------------|-------------|-------------|-------------|
| M05-2X = -1740.3584081                                       |             |             |             |
| B                                                            | -0.13805400 | 0.87058900  | -0.59184700 |
| B                                                            | -1.60659900 | -0.33461100 | 0.75397400  |
| B                                                            | 0.39837400  | -1.28965500 | 0.10537600  |
| N                                                            | -1.40778400 | 0.87951200  | 0.03136100  |
| N                                                            | -0.77901600 | -1.47562800 | 0.84809600  |
| N                                                            | 0.87758400  | -0.12835100 | -0.59083300 |
| C                                                            | 1.36567800  | -2.68739600 | 0.02395300  |
| P                                                            | 3.05715100  | -2.22583100 | -0.03013700 |
| H                                                            | 1.12322500  | -3.23772200 | -0.88457200 |
| C                                                            | 4.23249300  | -3.59986400 | 0.18470800  |
| C                                                            | 3.45726500  | -1.44771500 | -1.60274400 |
| C                                                            | 3.41090500  | -1.08979300 | 1.32788300  |
| H                                                            | 5.25607000  | -3.23389100 | 0.15578200  |
| H                                                            | 4.08371800  | -4.32197500 | -0.61309100 |
| H                                                            | 4.04614400  | -4.08433500 | 1.13918000  |
| H                                                            | 3.42629300  | -2.20369300 | -2.38364800 |
| H                                                            | 4.44375400  | -0.99247000 | -1.56774800 |
| H                                                            | 2.65535900  | -0.71289400 | -1.73595700 |
| H                                                            | 3.26951600  | -1.62052300 | 2.26593400  |
| H                                                            | 4.42828700  | -0.71368500 | 1.26379300  |
| H                                                            | 2.68173600  | -0.28871400 | 1.24734600  |
| H                                                            | 1.16245200  | -3.30397100 | 0.89577900  |
| C                                                            | -3.14199200 | -0.52920300 | 1.42664600  |
| P                                                            | -4.13607000 | -0.66858200 | -0.01982500 |
| H                                                            | -3.48388500 | 0.33184800  | 1.99751900  |
| C                                                            | -5.76240500 | -1.44003800 | 0.25615500  |
| C                                                            | -4.42384400 | 0.96541100  | -0.71574200 |
| C                                                            | -3.31843200 | -1.68913200 | -1.26347300 |
| H                                                            | -6.33402100 | -1.46469200 | -0.66828600 |
| H                                                            | -6.30463600 | -0.86997100 | 1.00515300  |
| H                                                            | -5.61528100 | -2.45351500 | 0.61943500  |
| H                                                            | -5.10403400 | 1.51651600  | -0.07140200 |
| H                                                            | -4.83710200 | 0.88750400  | -1.71767400 |
| H                                                            | -3.42617000 | 1.42087600  | -0.71007800 |
| H                                                            | -2.93702400 | -2.58110000 | -0.77360400 |
| H                                                            | -4.01515900 | -1.93526900 | -2.06087300 |
| H                                                            | -2.46501900 | -1.12670700 | -1.63376000 |
| H                                                            | -3.17920200 | -1.44855100 | 2.00374200  |
| C                                                            | 0.27327700  | 2.36873900  | -1.26776800 |

---

---

| $(\text{Me}_3\text{PCH}_2)_3 \cdot \text{B}_3\text{N}_3$ (cont'd.) |             |            |             |
|--------------------------------------------------------------------|-------------|------------|-------------|
| P                                                                  | 1.30553500  | 3.03992300 | -0.01333400 |
| H                                                                  | -0.62622800 | 2.96608400 | -1.38054300 |
| C                                                                  | 2.94911000  | 2.32564600 | -0.20912800 |
| C                                                                  | 1.49658900  | 4.84981200 | -0.04633800 |
| C                                                                  | 0.69616600  | 2.64384300 | 1.63740900  |
| H                                                                  | 3.55339400  | 2.47799200 | 0.68076600  |
| H                                                                  | 3.43541400  | 2.77049100 | -1.07322100 |
| H                                                                  | 2.74233800  | 1.26737800 | -0.38858500 |
| H                                                                  | 1.86419000  | 5.15266800 | -1.02254200 |
| H                                                                  | 2.19162700  | 5.17440900 | 0.72401800  |
| H                                                                  | 0.52626200  | 5.30770600 | 0.12549000  |
| H                                                                  | 0.77461500  | 1.56810000 | 1.77689400  |
| H                                                                  | 1.26477500  | 3.19375400 | 2.38362900  |
| H                                                                  | -0.36223800 | 2.88707800 | 1.67267900  |
| H                                                                  | 0.84864300  | 2.30643000 | -2.18936000 |

---

---

---

$(\text{ImMe}_2)_3 \cdot \text{B}_3\text{N}_3 \text{ } C_2$   
M05-2X = -1153.7788135

---

|   |             |             |             |
|---|-------------|-------------|-------------|
| B | 0.66115700  | -1.16633200 | 0.02445000  |
| B | 0.66081500  | 1.16654400  | -0.02452800 |
| B | -1.33925500 | -0.00021800 | 0.00003200  |
| N | 1.46270100  | 0.00022100  | -0.00006300 |
| N | -0.74842500 | 1.28407100  | 0.05606800  |
| N | -0.74805500 | -1.28431100 | -0.05608900 |
| C | 1.49082100  | 2.58869300  | -0.18949400 |
| N | 1.03966500  | 3.83683000  | 0.04345000  |
| N | 2.76079300  | 2.75348300  | -0.61083400 |
| C | 2.01311200  | 4.76728300  | -0.21951800 |
| C | 3.09886200  | 4.08344300  | -0.63659500 |
| H | 1.84579900  | 5.81806700  | -0.09088300 |
| H | 4.06656600  | 4.41881200  | -0.95240300 |
| C | 1.49156400  | -2.58825600 | 0.18945200  |
| N | 2.76152200  | -2.75272800 | 0.61096500  |
| N | 1.04078000  | -3.83651300 | -0.04363400 |
| C | 3.09995000  | -4.08260100 | 0.63669800  |
| C | 2.01443400  | -4.76670900 | 0.21946300  |
| H | 4.06767500  | -4.41772000 | 0.95270700  |
| H | 1.84742800  | -5.81753800 | 0.09077800  |
| C | -2.98382600 | -0.00043900 | 0.00008700  |
| N | -3.79989600 | 0.82407300  | 0.67850900  |
| N | -3.79967700 | -0.82517900 | -0.67834400 |
| C | -5.11703600 | 0.51869200  | 0.43086500  |
| C | -5.11690300 | -0.52009400 | -0.43075700 |
| H | -5.92503800 | 1.05618800  | 0.88590900  |
| H | -5.92476700 | -1.05780500 | -0.88578100 |
| C | -0.29258200 | -4.17521400 | -0.52021100 |
| H | -0.91246400 | -3.29721300 | -0.33128700 |
| H | -0.25467000 | -4.39927900 | -1.58339100 |
| H | -0.64218900 | -5.04673700 | 0.02545800  |
| C | 3.66080700  | -1.69098700 | 1.04142400  |
| H | 4.55357200  | -1.70811000 | 0.42145600  |
| H | 3.11782900  | -0.75489400 | 0.90657200  |
| H | 3.93395200  | -1.85712700 | 2.07991400  |
| C | -3.34953800 | -1.86530000 | -1.58913200 |
| H | -2.26716100 | -1.90637300 | -1.49864900 |
| H | -3.78404800 | -2.81539800 | -1.29105500 |
| H | -3.65869500 | -1.62058100 | -2.60146400 |
| C | -3.34999100 | 1.86436800  | 1.58923900  |
| H | -2.26769500 | 1.90628300  | 1.49803500  |
| H | -3.78556400 | 2.81413600  | 1.29168000  |
| H | -3.65819900 | 1.61916000  | 2.60174600  |
| C | 3.66045000  | 1.69198000  | -1.04111900 |
| H | 4.55300100  | 1.70922000  | -0.42085500 |
| H | 3.11762300  | 0.75575000  | -0.90655900 |
| H | 3.93390800  | 1.85831000  | -2.07949400 |
| C | -0.29392500 | 4.17519600  | 0.51964300  |
| H | -0.91351500 | 3.29699300  | 0.33068000  |
| H | -0.25634800 | 4.39934200  | 1.58282300  |
| H | -0.64363500 | 5.04658100  | -0.02617700 |

---



---

| $(\text{ImMe}_2)_3\text{BN}\cdot\text{BH}_3 (C_1)$ |             |             |             |  |
|----------------------------------------------------|-------------|-------------|-------------|--|
| <b>M05-2X</b> = -411.1686683                       |             |             |             |  |
| B                                                  | -1.30978013 | -0.02280891 | -0.00039906 |  |
| N                                                  | -2.54265213 | -0.02056791 | -0.00105807 |  |
| C                                                  | 0.20503187  | -0.00566692 | 0.00002695  |  |
| C                                                  | 2.32688187  | -0.65134393 | 0.00060701  |  |
| C                                                  | 2.30717088  | 0.70148307  | 0.00056990  |  |
| H                                                  | 3.14807787  | -1.33994693 | 0.00088306  |  |
| H                                                  | 3.10809188  | 1.41357307  | 0.00082785  |  |
| N                                                  | 1.02069487  | -1.07067792 | 0.00027803  |  |
| N                                                  | 0.98945088  | 1.08264208  | 0.00018987  |  |
| C                                                  | 0.56139387  | -2.45283492 | -0.00070086 |  |
| H                                                  | -0.52331613 | -2.44254391 | 0.00362913  |  |
| H                                                  | 0.92101387  | -2.95374299 | -0.89290182 |  |
| H                                                  | 0.92830586  | -2.95721685 | 0.88654218  |  |
| C                                                  | 0.48924088  | 2.45073008  | -0.00067124 |  |
| H                                                  | 0.83560989  | 2.96251101  | -0.89193128 |  |
| H                                                  | -0.59478812 | 2.40822609  | 0.00173776  |  |
| H                                                  | 0.83962988  | 2.96499415  | 0.88757372  |  |
| B                                                  | -4.07280913 | -0.01515890 | -0.00045908 |  |
| H                                                  | -4.45592412 | 1.11853308  | -0.22208316 |  |
| H                                                  | -4.45648312 | -0.78664397 | -0.86177202 |  |
| H                                                  | -4.44804313 | -0.39188181 | 1.09692595  |  |

---

---

**(ImMe<sub>2</sub>)<sub>3</sub>·BNBN·BH<sub>3</sub> (C<sub>1</sub>)**

**M05-2X = -490.796326**

---

|   |             |             |             |
|---|-------------|-------------|-------------|
| B | 0.38975896  | 0.00280498  | -0.00176798 |
| N | 1.62853896  | 0.00386898  | -0.00261496 |
| B | 3.02519396  | 0.00429598  | -0.00319293 |
| N | 4.26542296  | 0.00363798  | -0.00285091 |
| C | -1.12327304 | 0.00044898  | -0.00050801 |
| C | -3.23055404 | 0.67425898  | 0.00034903  |
| C | -3.22819904 | -0.68067802 | 0.00252988  |
| H | -4.04380704 | 1.37255998  | 0.00033810  |
| H | -4.03902804 | -1.38179002 | 0.00399178  |
| N | -1.92264504 | 1.07870598  | -0.00193390 |
| N | -1.91889304 | -1.08058302 | 0.00236086  |
| C | -1.45361504 | 2.46000998  | 0.00095526  |
| H | -0.36997704 | 2.45194698  | -0.03974672 |
| H | -1.84786102 | 2.97497807  | -0.86782168 |
| H | -1.78095405 | 2.95075187  | 0.91076731  |
| C | -1.44506804 | -2.46025902 | -0.00102029 |
| H | -1.77491102 | -2.95317192 | -0.90874535 |
| H | -0.36128804 | -2.44837503 | 0.03464973  |
| H | -1.83348505 | -2.97559212 | 0.87016864  |
| B | 5.78621196  | 0.00013798  | 0.00091812  |
| H | 6.17292594  | -0.28666315 | 1.12913709  |
| H | 6.18865198  | -0.84922093 | -0.78262397 |
| H | 6.20119697  | 1.10628701  | -0.30846375 |

---

---

---

**(ImMe<sub>2</sub>)<sub>3</sub>·B<sub>2</sub>N<sub>2</sub>·BH<sub>3</sub> (C<sub>1</sub>)**  
**M05-2X = -490.8127653**

|   |             |             |             |
|---|-------------|-------------|-------------|
| N | 2.33759599  | 0.01319495  | -0.17312680 |
| N | 1.34143884  | -2.11050847 | -0.53169570 |
| B | 1.00044028  | -0.71366158 | -0.27785386 |
| B | 2.44450553  | -1.33447003 | -0.36603567 |
| C | -0.40487799 | -0.06320711 | -0.12883704 |
| C | -2.04508457 | 1.40767427  | -0.01091132 |
| C | -2.57272411 | 0.18016308  | 0.22185574  |
| H | -2.50506594 | 2.37504609  | -0.04453945 |
| H | -3.57816002 | -0.12459729 | 0.43354267  |
| N | -0.70863148 | 1.23558777  | -0.22737419 |
| N | -1.54514476 | -0.71495853 | 0.13659391  |
| C | 0.23122012  | 2.32450910  | -0.49741920 |
| H | 1.13403732  | 1.90844042  | -0.92433308 |
| H | -0.24591908 | 3.01440386  | -1.18467030 |
| H | 0.49277785  | 2.80714829  | 0.43643878  |
| C | -1.67354222 | -2.15774356 | 0.33415203  |
| H | -2.48011802 | -2.52099793 | -0.29296702 |
| H | -0.73434202 | -2.62068322 | 0.05314315  |
| H | -1.89541924 | -2.35329255 | 1.37793102  |
| B | 2.65760449  | 0.99586318  | 1.06434614  |
| H | 3.52756462  | 0.50228258  | 1.74315327  |
| H | 2.97376311  | 2.09023427  | 0.64511108  |
| H | 1.61137240  | 1.07177283  | 1.71108504  |

---

---

| <b>(ImMe<sub>2</sub>)<sub>3</sub>·B<sub>3</sub>N<sub>3</sub>·BH<sub>3</sub>·<i>ortho</i> (C<sub>1</sub>)</b> |             |             |             |
|--------------------------------------------------------------------------------------------------------------|-------------|-------------|-------------|
| <b>M05-2X = -570.5681327</b>                                                                                 |             |             |             |
| B                                                                                                            | 2.88562006  | 0.39997071  | 0.23397014  |
| B                                                                                                            | 0.82966401  | -0.24999409 | -0.18486390 |
| B                                                                                                            | 2.68418793  | -1.19013424 | -0.74471691 |
| N                                                                                                            | 1.61199310  | 0.80115982  | 0.47204714  |
| N                                                                                                            | 1.37755092  | -1.38949612 | -0.87039194 |
| N                                                                                                            | 3.74569399  | -0.47176735 | -0.29770988 |
| C                                                                                                            | -0.76221898 | -0.12466195 | -0.11472792 |
| N                                                                                                            | -1.60503807 | -1.10258388 | 0.24026204  |
| N                                                                                                            | -1.51671088 | 0.92984013  | -0.43529889 |
| C                                                                                                            | -2.89843003 | -0.65358977 | 0.16569804  |
| C                                                                                                            | -1.21041920 | -2.42919593 | 0.69897700  |
| C                                                                                                            | -2.84200291 | 0.62630324  | -0.26516292 |
| C                                                                                                            | -1.02336976 | 2.22883410  | -0.87349585 |
| H                                                                                                            | -3.73327109 | -1.27615070 | 0.41795001  |
| H                                                                                                            | -0.26598321 | -2.67990300 | 0.23251800  |
| H                                                                                                            | -1.11252621 | -2.42823798 | 1.77986500  |
| H                                                                                                            | -1.97543526 | -3.13554586 | 0.39766697  |
| H                                                                                                            | -3.61876784 | 1.33600732  | -0.46798591 |
| H                                                                                                            | -1.16368470 | 2.95044509  | -0.07778382 |
| H                                                                                                            | 0.03702524  | 2.14879401  | -1.07072484 |
| H                                                                                                            | -1.55872172 | 2.51852418  | -1.77160484 |
| B                                                                                                            | 1.10875419  | 1.96745083  | 1.48882717  |
| H                                                                                                            | 1.83954118  | 1.94794173  | 2.45224318  |
| H                                                                                                            | 1.17030829  | 3.03275384  | 0.91042621  |
| H                                                                                                            | -0.03539384 | 1.69269892  | 1.80125815  |

---

---

| <b>(ImMe<sub>2</sub>)<sub>3</sub>·B<sub>3</sub>N<sub>3</sub>·BH<sub>3</sub>·<i>para</i> (C<sub>1</sub>)</b> |             |             |             |
|-------------------------------------------------------------------------------------------------------------|-------------|-------------|-------------|
| <b>M05-2X = -570.5472887</b>                                                                                |             |             |             |
| B                                                                                                           | 2.41748493  | 0.88757502  | 0.09622814  |
| B                                                                                                           | 0.48771594  | -0.05892700 | -0.00378891 |
| B                                                                                                           | 2.40644095  | -1.04030597 | -0.10306395 |
| N                                                                                                           | 1.14695092  | 1.22865300  | 0.12870416  |
| N                                                                                                           | 1.12908896  | -1.35626799 | -0.13638797 |
| N                                                                                                           | 3.38484694  | -0.08349197 | -0.00300890 |
| C                                                                                                           | -1.11823906 | -0.01399502 | -0.00393691 |
| N                                                                                                           | -1.98396105 | -1.04210104 | 0.01654704  |
| N                                                                                                           | -1.87089908 | 1.10157897  | -0.02273386 |
| C                                                                                                           | -3.27023106 | -0.57737105 | 0.01408006  |
| C                                                                                                           | -1.66114503 | -2.46703504 | 0.06476797  |
| C                                                                                                           | -3.19845307 | 0.77222495  | -0.01270987 |
| C                                                                                                           | -1.39839109 | 2.48593497  | -0.05508179 |
| H                                                                                                           | -4.11360405 | -1.23847907 | 0.02924003  |
| H                                                                                                           | -0.59866203 | -2.58008801 | -0.10097203 |
| H                                                                                                           | -1.93491803 | -2.85710209 | 1.03989395  |
| H                                                                                                           | -2.23066302 | -2.97213400 | -0.70800506 |
| H                                                                                                           | -3.96888308 | 1.51665894  | -0.02899884 |
| H                                                                                                           | -0.84184710 | 2.70498394  | 0.84576623  |
| H                                                                                                           | -0.74138410 | 2.62885002  | -0.90158978 |
| H                                                                                                           | -2.27546310 | 3.11795297  | -0.13452476 |
| B                                                                                                           | 5.05454994  | 0.06188905  | 0.00979111  |
| H                                                                                                           | 5.42844194  | -0.57350399 | 0.96283407  |
| H                                                                                                           | 5.42696994  | -0.38327189 | -1.04611092 |
| H                                                                                                           | 5.25562292  | 1.24782805  | 0.12207516  |

---

---

$(\text{ImMe}_2)_3\text{BN}\cdot\text{W}(\text{CO})_5 (C_1)$   
M05-2X = -1018.8598516

---

|   |             |             |             |
|---|-------------|-------------|-------------|
| B | 0.00000000  | -0.00000000 | -1.98744396 |
| N | 0.00000000  | -0.00000000 | -0.74698196 |
| C | 0.00000000  | -0.00000000 | -3.50454296 |
| C | 0.00000000  | 0.67655700  | -5.61638996 |
| C | 0.00000000  | -0.67655700 | -5.61638996 |
| H | 0.00000000  | 1.37692900  | -6.42762796 |
| H | 0.00000000  | -1.37692900 | -6.42762796 |
| N | 0.00000000  | 1.07703500  | -4.30472696 |
| N | 0.00000000  | -1.07703500 | -4.30472696 |
| C | 0.00000000  | 2.45374800  | -3.82842296 |
| H | 0.00000000  | 2.43141000  | -2.74401796 |
| H | 0.88969288  | 2.96067004  | -4.18563496 |
| H | -0.88969288 | 2.96067004  | -4.18563496 |
| C | 0.00000000  | -2.45374800 | -3.82842296 |
| H | 0.88969288  | -2.96067004 | -4.18563496 |
| H | 0.00000000  | -2.43141000 | -2.74401796 |
| H | -0.88969288 | -2.96067004 | -4.18563496 |
| W | 0.00000000  | -0.00000000 | 1.42790704  |
| C | 0.00000000  | -2.05087400 | 1.39442304  |
| C | 0.00000000  | -0.00000000 | 3.41224604  |
| C | 2.05191500  | -0.00000000 | 1.49269404  |
| C | -0.00000000 | 2.05087400  | 1.39442304  |
| C | -2.05191500 | -0.00000000 | 1.49269404  |
| O | -3.18737200 | 0.00000000  | 1.59206004  |
| O | 0.00000000  | -3.19088600 | 1.38277104  |
| O | 0.00000000  | -0.00000000 | 4.56272704  |
| O | 3.18737200  | 0.00000000  | 1.59206004  |
| O | -0.00000000 | 3.19088600  | 1.38277104  |

---

---

| $(\text{ImMe}_2)_3\text{BNBN}\cdot\text{W}(\text{CO})_5 (C_1)$ |             |             |             |  |
|----------------------------------------------------------------|-------------|-------------|-------------|--|
| M05-2X = -1098.4921553                                         |             |             |             |  |
| B                                                              | 0.00000000  | 0.00000000  | 3.79210627  |  |
| N                                                              | 0.00000000  | 0.00000000  | 2.55225627  |  |
| B                                                              | 0.00000000  | 0.00000000  | 1.15664527  |  |
| N                                                              | 0.00000000  | 0.00000000  | -0.09242373 |  |
| C                                                              | 0.00000000  | 0.00000000  | 5.30473727  |  |
| C                                                              | -0.00086012 | 0.67753800  | 7.41096726  |  |
| C                                                              | 0.00086012  | -0.67753800 | 7.41096726  |  |
| H                                                              | -0.00112441 | 1.37700601  | 8.22326425  |  |
| H                                                              | 0.00112441  | -1.37700601 | 8.22326425  |  |
| N                                                              | -0.00204428 | 1.08019498  | 6.10280425  |  |
| N                                                              | 0.00204428  | -1.08019498 | 6.10280425  |  |
| C                                                              | 0.00471616  | 2.46112597  | 5.63303923  |  |
| H                                                              | -0.05680783 | 2.45383193  | 4.55043123  |  |
| H                                                              | -0.85187306 | 2.98378463  | 6.04343621  |  |
| H                                                              | 0.92475096  | 2.94435735  | 5.94270522  |  |
| C                                                              | -0.00471616 | -2.46112597 | 5.63303923  |  |
| H                                                              | -0.92475096 | -2.94435735 | 5.94270522  |  |
| H                                                              | 0.05680783  | -2.45383193 | 4.55043123  |  |
| H                                                              | 0.85187306  | -2.98378463 | 6.04343621  |  |
| W                                                              | 0.00000000  | 0.00000000  | -2.24710873 |  |
| C                                                              | 1.33703357  | 1.55843038  | -2.27791575 |  |
| C                                                              | 1.55021176  | -1.34642353 | -2.29284270 |  |
| C                                                              | -1.33703357 | -1.55843038 | -2.27791575 |  |
| C                                                              | -1.55021176 | 1.34642353  | -2.29284270 |  |
| C                                                              | 0.00000000  | 0.00000000  | -4.23006173 |  |
| O                                                              | -2.40650665 | 2.09455884  | -2.38042278 |  |
| O                                                              | 2.07570721  | 2.42418768  | -2.35050676 |  |
| O                                                              | 0.00000000  | 0.00000000  | -5.38345373 |  |
| O                                                              | 2.40650665  | -2.09455884 | -2.38042278 |  |
| O                                                              | -2.07570721 | -2.42418768 | -2.35050676 |  |

---

---

| <b>(ImMe<sub>2</sub>)<sub>3</sub>·B<sub>2</sub>N<sub>2</sub>·W(CO)<sub>5</sub> (C<sub>1</sub>)</b> |             |             |             |
|----------------------------------------------------------------------------------------------------|-------------|-------------|-------------|
| <b>M05-2X = -1098.4998056</b>                                                                      |             |             |             |
| N                                                                                                  | 0.26539289  | 0.64371056  | -1.61514919 |
| N                                                                                                  | 1.87634583  | 2.40666962  | -1.60792263 |
| B                                                                                                  | 1.69421989  | 1.02291470  | -1.18793033 |
| B                                                                                                  | 0.63983084  | 1.92590651  | -1.91472648 |
| C                                                                                                  | 2.71057395  | 0.09625489  | -0.45740717 |
| C                                                                                                  | 3.80374504  | -1.67529192 | 0.27822317  |
| C                                                                                                  | 4.34425003  | -0.58018977 | 0.86577391  |
| H                                                                                                  | 4.04312207  | -2.71524789 | 0.37567539  |
| H                                                                                                  | 5.14178305  | -0.48513159 | 1.57516786  |
| N                                                                                                  | 2.79811899  | -1.23612412 | -0.53438088 |
| N                                                                                                  | 3.66157497  | 0.50398510  | 0.39068171  |
| C                                                                                                  | 1.94365298  | -2.10127233 | -1.34316266 |
| H                                                                                                  | 1.21367094  | -1.47894846 | -1.84757177 |
| H                                                                                                  | 2.55809697  | -2.63086346 | -2.06337657 |
| H                                                                                                  | 1.43976003  | -2.80428220 | -0.68872449 |
| C                                                                                                  | 3.90022895  | 1.89049620  | 0.78887440  |
| H                                                                                                  | 4.96985294  | 2.06611423  | 0.79207832  |
| H                                                                                                  | 3.41014290  | 2.53610703  | 0.06883228  |
| H                                                                                                  | 3.49164298  | 2.05106340  | 1.78111638  |
| W                                                                                                  | -1.18309303 | -0.00621812 | 0.04948901  |
| C                                                                                                  | 0.20400705  | -0.84729182 | 1.24133714  |
| C                                                                                                  | -0.90040104 | 1.75994211  | 1.06747762  |
| C                                                                                                  | -2.74700910 | 0.80552559  | -1.07043210 |
| C                                                                                                  | -2.50569395 | -0.51972687 | 1.41549118  |
| C                                                                                                  | -1.43884700 | -1.82995532 | -0.84895858 |
| O                                                                                                  | -1.57288299 | -2.87615842 | -1.28192035 |
| O                                                                                                  | -3.27565891 | -0.81603372 | 2.21587727  |
| O                                                                                                  | -0.76271304 | 2.69277925  | 1.70559641  |
| O                                                                                                  | 0.94280409  | -1.35259064 | 1.96301222  |
| O                                                                                                  | -3.64236313 | 1.22182744  | -1.62731615 |

---



---

| <b>(ImMe<sub>2</sub>)<sub>3</sub>·B<sub>3</sub>N<sub>3</sub>·W(CO)<sub>5</sub>·ortho (C<sub>1</sub>)</b> |             |             |             |  |
|----------------------------------------------------------------------------------------------------------|-------------|-------------|-------------|--|
| <b>M05-2X = -1178.2522794</b>                                                                            |             |             |             |  |
| B                                                                                                        | -0.15780330 | 2.66867635  | 0.75612335  |  |
| B                                                                                                        | -1.87803361 | 1.38612357  | 0.37829809  |  |
| B                                                                                                        | -1.79726721 | 3.52916398  | 0.47315399  |  |
| N                                                                                                        | -0.42868771 | 1.35145504  | 0.64325189  |  |
| N                                                                                                        | -2.68809522 | 2.56355626  | 0.25772518  |  |
| N                                                                                                        | -0.53622235 | 3.95353443  | 0.73799091  |  |
| C                                                                                                        | -2.61067777 | -0.02721343 | 0.20966211  |  |
| N                                                                                                        | -3.36438744 | -0.41312396 | -0.82444446 |  |
| N                                                                                                        | -2.62122532 | -1.03643799 | 1.08753768  |  |
| C                                                                                                        | -3.83959622 | -1.68264238 | -0.60754247 |  |
| C                                                                                                        | -3.61670255 | 0.38172059  | -2.02187348 |  |
| C                                                                                                        | -3.37642820 | -2.07232098 | 0.60075099  |  |
| C                                                                                                        | -1.99501378 | -1.00947925 | 2.40356545  |  |
| H                                                                                                        | -4.45087419 | -2.19238690 | -1.32490623 |  |
| H                                                                                                        | -3.49155773 | 1.42575496  | -1.76162535 |  |
| H                                                                                                        | -2.92206928 | 0.09623861  | -2.80432140 |  |
| H                                                                                                        | -4.63687321 | 0.20256252  | -2.34153985 |  |
| H                                                                                                        | -3.50556336 | -2.98666643 | 1.14412567  |  |
| H                                                                                                        | -1.59475256 | -1.99390355 | 2.61450388  |  |
| H                                                                                                        | -1.18920876 | -0.28549403 | 2.38135837  |  |
| H                                                                                                        | -2.73107691 | -0.73224006 | 3.15127915  |  |
| W                                                                                                        | 1.19752943  | -0.14802724 | -0.07803385 |  |
| C                                                                                                        | 0.27900266  | -1.88603028 | 0.38863734  |  |
| C                                                                                                        | 2.01411356  | -0.10290715 | 1.81737282  |  |
| C                                                                                                        | 2.62457426  | -1.33502297 | -0.73085244 |  |
| C                                                                                                        | 2.44950998  | 1.36990500  | -0.72840805 |  |
| C                                                                                                        | 0.24543393  | -0.20048591 | -1.88342213 |  |
| O                                                                                                        | 2.45500922  | -0.11771874 | 2.86442856  |  |
| O                                                                                                        | -0.13511510 | -2.93466565 | 0.59859799  |  |
| O                                                                                                        | 3.45616292  | -2.02751246 | -1.11448837 |  |
| O                                                                                                        | -0.31641395 | -0.26478169 | -2.87454587 |  |
| O                                                                                                        | 3.22727562  | 2.08896667  | -1.13949427 |  |

---

---

| <b>(ImMe<sub>2</sub>)<sub>3</sub>·B<sub>3</sub>N<sub>3</sub>·W(CO)<sub>5</sub>·<i>para</i> (C<sub>1</sub>)</b> |             |             |             |  |
|----------------------------------------------------------------------------------------------------------------|-------------|-------------|-------------|--|
| <b>M05-2X = -1178.2389328</b>                                                                                  |             |             |             |  |
| B                                                                                                              | 1.14628863  | -0.88528988 | 0.09680199  |  |
| B                                                                                                              | 3.07386486  | 0.05817184  | -0.00402560 |  |
| B                                                                                                              | 1.15240809  | 1.01879982  | -0.10350478 |  |
| N                                                                                                              | 2.41619455  | -1.23248157 | 0.13100608  |  |
| N                                                                                                              | 2.42599717  | 1.35349634  | -0.13904749 |  |
| N                                                                                                              | 0.16676786  | 0.07061804  | -0.00283058 |  |
| C                                                                                                              | 4.67882586  | 0.01893273  | -0.00413147 |  |
| N                                                                                                              | 5.54023089  | 1.05070289  | 0.01427116  |  |
| N                                                                                                              | 5.43570581  | -1.09381251 | -0.02089148 |  |
| C                                                                                                              | 6.82801487  | 0.59098779  | 0.01270156  |  |
| C                                                                                                              | 5.21269691  | 2.47485345  | 0.06150832  |  |
| C                                                                                                              | 6.76165982  | -0.75910549 | -0.01160311 |  |
| C                                                                                                              | 4.96907077  | -2.48037782 | -0.05097140 |  |
| H                                                                                                              | 7.66883789  | 1.25537689  | 0.02652436  |  |
| H                                                                                                              | 4.15328222  | 2.58662541  | -0.12241772 |  |
| H                                                                                                              | 5.46747430  | 2.86250966  | 1.04270231  |  |
| H                                                                                                              | 5.79535220  | 2.98330971  | -0.69903953 |  |
| H                                                                                                              | 7.53518380  | -1.50036071 | -0.02676434 |  |
| H                                                                                                              | 4.41328326  | -2.70021648 | 0.85013319  |  |
| H                                                                                                              | 4.31357817  | -2.62779947 | -0.89787780 |  |
| H                                                                                                              | 5.84876086  | -3.10880977 | -0.12874174 |  |
| W                                                                                                              | -2.16404115 | 0.00224522  | 0.00026232  |  |
| C                                                                                                              | -2.17887398 | -1.53326235 | -1.36129613 |  |
| C                                                                                                              | -2.18832480 | -1.35230014 | 1.54142578  |  |
| C                                                                                                              | -4.12304916 | -0.04959763 | 0.00208866  |  |
| C                                                                                                              | -2.25491232 | 1.53541083  | 1.36418563  |  |
| C                                                                                                              | -2.26038650 | 1.35411858  | -1.54268630 |  |
| O                                                                                                              | -2.25611278 | -2.38281897 | -2.11516854 |  |
| O                                                                                                              | -5.27196616 | -0.07972654 | 0.00308409  |  |
| O                                                                                                              | -2.27449327 | -2.10145738 | 2.39440921  |  |
| O                                                                                                              | -2.38475203 | 2.09654982  | -2.39639300 |  |
| O                                                                                                              | -2.37294053 | 2.37835148  | 2.11967179  |  |

---

---

| <b>ImMe<sub>2</sub>·B<sub>2</sub>N<sub>2</sub>·(BH<sub>3</sub>)<sub>2</sub> (C<sub>2</sub>)</b> |             |             |             |
|-------------------------------------------------------------------------------------------------|-------------|-------------|-------------|
| <b>M05-2X = -517.473553</b>                                                                     |             |             |             |
| N                                                                                               | 0.22253853  | 1.14499445  | -1.97064321 |
| N                                                                                               | -0.22253853 | -1.14499445 | -1.97064321 |
| B                                                                                               | -0.00000000 | 0.00000000  | -1.05377440 |
| B                                                                                               | -0.00000000 | 0.00000000  | -2.66270840 |
| C                                                                                               | -0.00000000 | 0.00000000  | 0.49638660  |
| C                                                                                               | -0.25114988 | 0.62986254  | 2.59218470  |
| C                                                                                               | 0.25114988  | -0.62986254 | 2.59218470  |
| H                                                                                               | -0.51493347 | 1.28142885  | 3.40119481  |
| H                                                                                               | 0.51493347  | -1.28142885 | 3.40119481  |
| N                                                                                               | -0.39538636 | 1.00286754  | 1.28776876  |
| N                                                                                               | 0.39538636  | -1.00286754 | 1.28776876  |
| C                                                                                               | -0.91169232 | 2.30052993  | 0.85140698  |
| H                                                                                               | -1.04611277 | 2.28548524  | -0.22152003 |
| H                                                                                               | -1.85420478 | 2.47883573  | 1.35725200  |
| H                                                                                               | -0.18519210 | 3.06794618  | 1.08961511  |
| C                                                                                               | 0.91169232  | -2.30052993 | 0.85140698  |
| H                                                                                               | 0.18519210  | -3.06794618 | 1.08961511  |
| H                                                                                               | 1.04611277  | -2.28548524 | -0.22152003 |
| H                                                                                               | 1.85420478  | -2.47883573 | 1.35725200  |
| B                                                                                               | 1.05568162  | 2.49626557  | -1.74160597 |
| H                                                                                               | 1.89373280  | 2.57457505  | -2.60409395 |
| H                                                                                               | 0.28473476  | 3.43203767  | -1.75665782 |
| H                                                                                               | 1.56567116  | 2.37052584  | -0.63714198 |
| B                                                                                               | -1.05568162 | -2.49626557 | -1.74160597 |
| H                                                                                               | -1.89373280 | -2.57457505 | -2.60409395 |
| H                                                                                               | -0.28473476 | -3.43203767 | -1.75665782 |
| H                                                                                               | -1.56567116 | -2.37052584 | -0.63714198 |

---

---

(ImMe<sub>2</sub>)<sub>2</sub>·B<sub>2</sub>N<sub>2</sub>·(BH<sub>3</sub>)<sub>2</sub> (C<sub>s</sub>)

M05-2X = -822.4890566

---

|   |             |             |             |
|---|-------------|-------------|-------------|
| N | -0.14148669 | 1.12732236  | 0.00000000  |
| N | -0.71041884 | -1.04557115 | 0.00000000  |
| B | -0.33150552 | 0.00632084  | 0.89354505  |
| B | -0.33150552 | 0.00632084  | -0.89354505 |
| C | -0.05051355 | -0.00028541 | 2.45175405  |
| C | 0.17855604  | 0.70261673  | 4.53793306  |
| C | 0.44370656  | -0.62551836 | 4.51698403  |
| H | 0.17820262  | 1.40729472  | 5.34539208  |
| H | 0.72259625  | -1.30032258 | 5.30143801  |
| N | -0.12425610 | 1.06805115  | 3.25609308  |
| N | 0.29275027  | -1.03932314 | 3.22236202  |
| C | -0.45473735 | 2.43038677  | 2.84282311  |
| H | -0.85265461 | 2.39911893  | 1.83709312  |
| H | -1.18231018 | 2.83041050  | 3.54119613  |
| H | 0.44906837  | 3.02791964  | 2.82899511  |
| C | 0.50362845  | -2.40854479 | 2.76109798  |
| H | -0.20716071 | -3.06257919 | 3.25361098  |
| H | 0.32863208  | -2.45327239 | 1.69371599  |
| H | 1.52044812  | -2.70349883 | 2.99922096  |
| C | -0.05051355 | -0.00028541 | -2.45175405 |
| C | 0.17855604  | 0.70261673  | -4.53793306 |
| C | 0.44370656  | -0.62551836 | -4.51698403 |
| H | 0.17820262  | 1.40729472  | -5.34539208 |
| H | 0.72259625  | -1.30032258 | -5.30143801 |
| N | -0.12425610 | 1.06805115  | -3.25609308 |
| N | 0.29275027  | -1.03932314 | -3.22236202 |
| C | -0.45473735 | 2.43038677  | -2.84282311 |
| H | -0.85265461 | 2.39911893  | -1.83709312 |
| H | 0.44906837  | 3.02791964  | -2.82899511 |
| H | -1.18231018 | 2.83041050  | -3.54119613 |
| C | 0.50362845  | -2.40854479 | -2.76109798 |
| H | 1.52044812  | -2.70349883 | -2.99922096 |
| H | 0.32863208  | -2.45327239 | -1.69371599 |
| H | -0.20716071 | -3.06257919 | -3.25361098 |
| B | 1.02734968  | 2.18766113  | 0.00000000  |
| H | 0.58326671  | 3.33174564  | 0.00000000  |
| H | 1.72630937  | 2.01856159  | 0.99671706  |
| B | -1.38906702 | -2.46111679 | 0.00000000  |
| H | -0.52942903 | -3.34899358 | 0.00000000  |
| H | -2.06985995 | -2.58212844 | 1.00585103  |
| H | -2.06985995 | -2.58212844 | -1.00585103 |
| H | 1.72630937  | 2.01856159  | -0.99671706 |

---

---

$(\text{ImMe}_2)_2\cdot\text{B}_3\text{N}_3\cdot(\text{BH}_3)_3 (C_1)$

M05-2X = -928.8776936

---

|   |             |             |             |
|---|-------------|-------------|-------------|
| B | 1.20746506  | 0.46461983  | -0.20060712 |
| B | -1.23470995 | 0.42406010  | -0.20682913 |
| B | -0.02259477 | 2.01543075  | -1.01548055 |
| N | -0.00236402 | -0.19846495 | 0.13307205  |
| N | -1.31655280 | 1.71426293  | -0.87128748 |
| N | 1.27462220  | 1.75022265  | -0.87022347 |
| C | -2.62079603 | -0.28696067 | 0.11630005  |
| N | -3.54629699 | 0.13755667  | 0.97560393  |
| N | -3.09425114 | -1.39713577 | -0.44847566 |
| C | -4.62231408 | -0.71104022 | 0.95502215  |
| C | -3.44272386 | 1.37450386  | 1.73702260  |
| C | -4.33605718 | -1.68152649 | 0.05678241  |
| C | -2.35859422 | -2.18549311 | -1.42565144 |
| H | -5.48496607 | -0.55349996 | 1.57015110  |
| H | -2.50331286 | 1.38045490  | 2.27925560  |
| H | -3.48664576 | 2.21404168  | 1.04908737  |
| H | -4.26641486 | 1.41045814  | 2.43972258  |
| H | -4.89859927 | -2.53662352 | -0.25901236 |
| H | -2.96216731 | -3.04473311 | -1.69202321 |
| H | -2.17508615 | -1.58167937 | -2.30847960 |
| H | -1.42240026 | -2.50666909 | -0.97782334 |
| C | 2.60924798  | -0.19764622 | 0.15817607  |
| N | 3.33034400  | 0.02080299  | 1.25411901  |
| N | 3.29383390  | -1.05071050 | -0.59882670 |
| C | 4.49196492  | -0.70541115 | 1.19612622  |
| C | 2.89744209  | 0.89755433  | 2.33008178  |
| C | 4.47076186  | -1.38038446 | 0.02368440  |
| C | 2.84133186  | -1.49408580 | -1.90740358 |
| H | 5.22123892  | -0.67956002 | 1.98019922  |
| H | 1.98695504  | 0.49513854  | 2.76374388  |
| H | 3.67968508  | 0.93613344  | 3.07828377  |
| H | 2.72977920  | 1.88955424  | 1.92186551  |
| H | 5.17955379  | -2.05365066 | -0.41402941 |
| H | 1.83241882  | -1.88242667 | -1.80826349 |
| H | 2.86786196  | -0.65296099 | -2.59370781 |
| H | 3.50227578  | -2.27965597 | -2.25289037 |
| B | 0.10788582  | -1.59901975 | 0.90456242  |
| H | 0.55916474  | -2.44199101 | 0.13622665  |
| H | 0.86024783  | -1.47250458 | 1.85514540  |
| B | 2.69641328  | 2.45573539  | -1.24027264 |
| H | 3.31921420  | 1.64879715  | -1.90503442 |
| H | 2.46689440  | 3.46635925  | -1.85316292 |
| B | -2.66311372 | 2.45126192  | -1.42765369 |
| H | -3.54455881 | 1.61346902  | -1.41354247 |
| H | -2.90911362 | 3.37889015  | -0.68490294 |
| H | -0.99307121 | -1.93301352 | 1.29872051  |
| H | -2.43550167 | 2.83303160  | -2.54937879 |
| H | 3.26289330  | 2.67940061  | -0.18746270 |

---

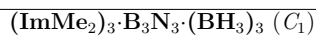

M05-2X = -1233.872235

---

|   |             |             |             |
|---|-------------|-------------|-------------|
| B | -1.36188115 | -0.19843015 | -0.13063997 |
| B | 0.50369974  | 1.28815373  | -0.01096499 |
| B | 0.84378332  | -1.08353547 | 0.01658603  |
| N | -0.90302135 | 1.14054557  | -0.11711298 |
| N | 1.42548809  | 0.21188218  | 0.05220102  |
| N | -0.54210084 | -1.35134564 | -0.06376496 |
| C | 1.09496663  | 2.77589438  | 0.06183500  |
| N | 0.94876715  | 3.63962648  | 1.06656999  |
| N | 1.84021599  | 3.38577992  | -0.86005901 |
| C | 1.60675585  | 4.80907908  | 0.78083798  |
| C | 2.17481174  | 4.64699473  | -0.43524202 |
| H | 1.61110435  | 5.64198408  | 1.45437797  |
| H | 2.77804014  | 5.30765336  | -1.02434203 |
| C | -2.94554329 | -0.43319021 | -0.21836296 |
| N | -3.78705234 | -0.51187570 | 0.81004105  |
| N | -3.67163939 | -0.59187278 | -1.32215895 |
| C | -5.06510846 | -0.72348894 | 0.35549105  |
| C | -4.99120250 | -0.77382199 | -0.99388195 |
| H | -5.90058952 | -0.81768743 | 1.01905706  |
| H | -5.75047759 | -0.92002755 | -1.73511194 |
| C | 1.85112158  | -2.32779007 | 0.10692904  |
| N | 2.67120730  | -2.78028257 | -0.84075696 |
| N | 2.04230412  | -3.09726918 | 1.17737605  |
| C | 3.38956866  | -3.85197600 | -0.36731995 |
| C | 2.99135855  | -4.05001575 | 0.90871205  |
| H | 4.11105135  | -4.36785544 | -0.96805395 |
| H | 3.29800212  | -4.77324892 | 1.63707606  |
| C | -3.09184538 | -0.57142514 | -2.65238896 |
| H | -2.62046881 | 0.39423557  | -2.80953997 |
| H | -2.36352286 | -1.37393258 | -2.72388895 |
| H | -3.88303748 | -0.72110168 | -3.37747195 |
| C | -3.35659626 | -0.38789194 | 2.19146004  |
| H | -2.66512174 | -1.19483735 | 2.41466305  |
| H | -2.87705568 | 0.57812077  | 2.31827603  |
| H | -4.22763529 | -0.45604841 | 2.83241205  |
| C | 1.29945523  | -2.92727872 | 2.41398405  |
| H | 0.24030016  | -3.04347609 | 2.19896306  |
| H | 1.62577478  | -3.68414391 | 3.11758706  |
| H | 1.50440282  | -1.93927884 | 2.81497704  |
| C | 2.76797463  | -2.22256364 | -2.17658496 |
| H | 2.24901320  | -1.27156833 | -2.17817097 |
| H | 3.81125273  | -2.05078227 | -2.41615197 |
| H | 2.31627222  | -2.90312238 | -2.89190795 |
| C | 2.30389760  | 2.73634964  | -2.07435701 |
| H | 3.01788513  | 1.96226121  | -1.80618700 |
| H | 1.45401033  | 2.29896714  | -2.58750600 |
| H | 2.76545804  | 3.48453835  | -2.70828102 |
| C | 0.13664799  | 3.37256197  | 2.24177600  |
| H | -0.90350906 | 3.29328859  | 1.93719200  |
| H | 0.46678144  | 2.44386778  | 2.69550200  |
| H | 0.27124748  | 4.18826090  | 2.94256099  |
| B | 2.98670019  | 0.37472625  | 0.30720501  |
| H | 3.33627774  | -0.38748295 | 1.19751002  |
| H | 3.61731003  | 0.10390686  | -0.71400299 |
| B | -1.95001264 | 2.32709720  | -0.24208199 |
| H | -2.68119776 | 2.13699862  | -1.20356398 |
| H | -2.64253961 | 2.37774262  | 0.77521102  |
| B | -1.19682670 | -2.79653725 | -0.04524694 |
| H | -1.79739980 | -2.95953088 | 1.01755206  |
| H | -1.99186478 | -2.90923879 | -0.96732894 |
| H | -0.33225022 | -3.64990577 | -0.15984694 |
| H | -1.36809701 | 3.38844085  | -0.39458200 |
| H | 3.23651288  | 1.52068910  | 0.64506400  |

---

Table S11: Gas Phase Ground State BP86/TZ2P Determined XYZ Coordinates (in Å) for the Mono-substituted Species.

| <b>ImMe<sub>2</sub></b> | <b><i>C</i><sub>2v</sub></b> |           |           |
|-------------------------|------------------------------|-----------|-----------|
| C                       | 0.000000                     | 0.000000  | -0.986088 |
| C                       | -0.680550                    | 0.000000  | 1.217578  |
| C                       | 0.680550                     | 0.000000  | 1.217578  |
| H                       | -1.384266                    | 0.000000  | 2.041305  |
| H                       | 1.384266                     | 0.000000  | 2.041305  |
| N                       | -1.063891                    | 0.000000  | -0.120553 |
| N                       | 1.063891                     | 0.000000  | -0.120553 |
| C                       | -2.445208                    | 0.000000  | -0.574008 |
| H                       | -2.429119                    | 0.000000  | -1.666982 |
| H                       | -2.972823                    | -0.894452 | -0.216760 |
| H                       | -2.972823                    | 0.894452  | -0.216760 |
| C                       | 2.445208                     | 0.000000  | -0.574008 |
| H                       | 2.972823                     | -0.894452 | -0.216760 |
| H                       | 2.429119                     | 0.000000  | -1.666982 |
| H                       | 2.972823                     | 0.894452  | -0.216760 |

---

| <b>ImMe<sub>2</sub>CH<sub>2</sub> C<sub>2v</sub></b> |           |           |           |
|------------------------------------------------------|-----------|-----------|-----------|
| C                                                    | -0.677678 | 0.000000  | -1.547475 |
| C                                                    | 0.677678  | 0.000000  | -1.547475 |
| H                                                    | -1.378124 | 0.000000  | -2.371113 |
| H                                                    | 1.378124  | 0.000000  | -2.371113 |
| N                                                    | -1.102842 | 0.000000  | -0.217853 |
| N                                                    | 1.102842  | 0.000000  | -0.217853 |
| C                                                    | -2.462761 | 0.000000  | 0.258075  |
| H                                                    | -2.663490 | 0.892342  | 0.872381  |
| H                                                    | -3.144558 | 0.000000  | -0.598602 |
| H                                                    | -2.663490 | -0.892342 | 0.872381  |
| C                                                    | 2.462761  | 0.000000  | 0.258075  |
| H                                                    | 3.144558  | 0.000000  | -0.598602 |
| H                                                    | 2.663490  | 0.892342  | 0.872381  |
| H                                                    | 2.663490  | -0.892342 | 0.872381  |
| C                                                    | 0.000000  | 0.000000  | 0.636611  |
| C                                                    | 0.000000  | 0.000000  | 2.003407  |
| H                                                    | 0.932546  | 0.000000  | 2.557697  |
| H                                                    | -0.932546 | 0.000000  | 2.557697  |

---



---

| $\text{Me}_3\text{PCH}_2 C_s$ |           |           |           |
|-------------------------------|-----------|-----------|-----------|
| P                             | 0.087154  | 0.127845  | 0.000000  |
| C                             | -0.966605 | -0.057479 | -1.483377 |
| H                             | -1.435473 | -1.050245 | -1.520669 |
| H                             | -0.335643 | 0.068320  | -2.374442 |
| H                             | -1.735494 | 0.724995  | -1.487073 |
| C                             | 1.001738  | -1.500169 | 0.000000  |
| H                             | 1.647432  | -1.543766 | -0.889416 |
| H                             | 0.325922  | -2.370108 | 0.000000  |
| H                             | 1.647432  | -1.543766 | 0.889416  |
| C                             | -0.966605 | -0.057479 | 1.483377  |
| H                             | -1.735494 | 0.724995  | 1.487073  |
| H                             | -1.435473 | -1.050245 | 1.520669  |
| C                             | 0.843802  | 1.630599  | 0.000000  |
| H                             | 1.319964  | 1.956026  | 0.927372  |
| H                             | 1.319964  | 1.956026  | -0.927372 |
| H                             | -0.335643 | 0.068320  | 2.374442  |

---

---

| <b>BN (singlet) <math>C_{\infty v}</math></b> |          |          |           |
|-----------------------------------------------|----------|----------|-----------|
| B                                             | 0.000000 | 0.000000 | -0.742953 |
| N                                             | 0.000000 | 0.000000 | 0.531206  |

---

| <b>ImMe<sub>2</sub>-BN <math>C_{2v}</math></b> |           |           |           |
|------------------------------------------------|-----------|-----------|-----------|
| B                                              | 0.000000  | 0.000000  | -1.848388 |
| N                                              | 0.000000  | 0.000000  | -3.118818 |
| C                                              | 0.000000  | 0.000000  | -0.340532 |
| C                                              | 0.000000  | 0.681922  | 1.808369  |
| C                                              | 0.000000  | -0.681922 | 1.808369  |
| H                                              | 0.000000  | 1.384650  | 2.630678  |
| H                                              | 0.000000  | -1.384650 | 2.630678  |
| N                                              | 0.000000  | 1.088558  | 0.487312  |
| N                                              | 0.000000  | -1.088558 | 0.487312  |
| C                                              | 0.000000  | 2.466640  | 0.008955  |
| H                                              | 0.000000  | 2.435261  | -1.087270 |
| H                                              | -0.897210 | 2.987926  | 0.363232  |
| H                                              | 0.897210  | 2.987926  | 0.363232  |
| C                                              | 0.000000  | -2.466640 | 0.008955  |
| H                                              | -0.897210 | -2.987926 | 0.363232  |
| H                                              | 0.000000  | -2.435261 | -1.087270 |
| H                                              | 0.897210  | -2.987926 | 0.363232  |

---

---

| <b>ImMe<sub>2</sub>CH<sub>2</sub>·BN C<sub>1</sub></b> |           |           |           |
|--------------------------------------------------------|-----------|-----------|-----------|
| B                                                      | 1.912860  | -1.348082 | -0.259767 |
| N                                                      | 2.788159  | -1.119008 | -1.151961 |
| C                                                      | -0.892438 | 1.804575  | -0.318303 |
| C                                                      | -1.930891 | 0.927551  | -0.381962 |
| H                                                      | -0.839015 | 2.853032  | -0.575255 |
| H                                                      | -2.955509 | 1.063460  | -0.697854 |
| N                                                      | 0.205665  | 1.115464  | 0.163832  |
| N                                                      | -1.453367 | -0.294693 | 0.066026  |
| C                                                      | 1.577276  | 1.628279  | 0.215237  |
| H                                                      | 2.208204  | 0.950526  | -0.406030 |
| H                                                      | 1.570348  | 2.656201  | -0.159059 |
| H                                                      | 1.947012  | 1.615181  | 1.247185  |
| C                                                      | -2.227810 | -1.531184 | 0.122574  |
| H                                                      | -3.252827 | -1.308704 | -0.186716 |
| H                                                      | -1.800903 | -2.276332 | -0.558910 |
| H                                                      | -2.243160 | -1.930485 | 1.142811  |
| C                                                      | -0.137954 | -0.177567 | 0.390768  |
| C                                                      | 0.768126  | -1.265607 | 0.828646  |
| H                                                      | 0.195633  | -2.195353 | 0.945535  |
| H                                                      | 1.185953  | -1.023127 | 1.820675  |

---

---

| $\text{Me}_3\text{PCH}_2\cdot\text{BN } C_s$ |           |           |           |
|----------------------------------------------|-----------|-----------|-----------|
| B                                            | 1.955249  | -0.668240 | 0.000000  |
| N                                            | 2.749475  | 0.321947  | 0.000000  |
| P                                            | -0.524976 | -0.014926 | 0.000000  |
| C                                            | -0.235112 | 0.986765  | -1.480132 |
| H                                            | -0.851434 | 1.895858  | -1.443642 |
| H                                            | -0.491052 | 0.404585  | -2.376827 |
| H                                            | 0.841004  | 1.230067  | -1.476532 |
| C                                            | -2.290483 | -0.503512 | 0.000000  |
| H                                            | -2.506585 | -1.105437 | -0.894020 |
| H                                            | -2.938430 | 0.384010  | 0.000000  |
| H                                            | -2.506585 | -1.105437 | 0.894020  |
| C                                            | -0.235112 | 0.986765  | 1.480132  |
| H                                            | -0.851434 | 1.895858  | 1.443642  |
| H                                            | -0.491052 | 0.404585  | 2.376827  |
| C                                            | 0.589567  | -1.441691 | 0.000000  |
| H                                            | 0.385810  | -2.055250 | 0.893339  |
| H                                            | 0.385810  | -2.055250 | -0.893339 |
| H                                            | 0.841004  | 1.230067  | 1.476532  |

---

---

| <b>B<sub>3</sub>N<sub>3</sub> (singlet) D<sub>3h</sub></b> |           |           |          |
|------------------------------------------------------------|-----------|-----------|----------|
| B                                                          | -0.543937 | 0.942126  | 0.000000 |
| B                                                          | 1.087874  | 0.000000  | 0.000000 |
| B                                                          | -0.543937 | -0.942126 | 0.000000 |
| N                                                          | 0.764899  | 1.324844  | 0.000000 |
| N                                                          | 0.764899  | -1.324844 | 0.000000 |
| N                                                          | -1.529798 | 0.000000  | 0.000000 |

---

| <b>ImMe<sub>2</sub>·B<sub>3</sub>N<sub>3</sub> C<sub>1</sub></b> |           |           |           |
|------------------------------------------------------------------|-----------|-----------|-----------|
| B                                                                | 2.892220  | 0.888542  | 0.017021  |
| B                                                                | 0.962475  | -0.031202 | 0.000596  |
| B                                                                | 2.892782  | -0.957399 | -0.018066 |
| N                                                                | 1.608508  | 1.281412  | 0.024772  |
| N                                                                | 1.608101  | -1.346404 | -0.024369 |
| N                                                                | 3.897735  | -0.034425 | -0.000680 |
| C                                                                | -0.642224 | -0.008542 | 0.000176  |
| N                                                                | -1.504654 | -1.064825 | 0.001029  |
| N                                                                | -1.435821 | 1.102015  | -0.003237 |
| C                                                                | -2.810586 | -0.622043 | -0.001229 |
| C                                                                | -1.132809 | -2.483063 | 0.008364  |
| C                                                                | -2.766626 | 0.740224  | -0.003445 |
| C                                                                | -0.984273 | 2.496318  | -0.002841 |
| H                                                                | -3.650825 | -1.303349 | -0.001400 |
| H                                                                | -0.036421 | -2.534213 | -0.020278 |
| H                                                                | -1.518410 | -2.950963 | 0.921788  |
| H                                                                | -1.570340 | -2.972122 | -0.869625 |
| H                                                                | -3.561962 | 1.473200  | -0.006871 |
| H                                                                | -0.408135 | 2.702026  | 0.902497  |
| H                                                                | -0.326395 | 2.674587  | -0.856021 |
| H                                                                | -1.874375 | 3.131677  | -0.052012 |

---

---

| <b>ImMe<sub>2</sub>CH<sub>2</sub>·B<sub>3</sub>N<sub>3</sub> C<sub>1</sub></b> |           |           |           |
|--------------------------------------------------------------------------------|-----------|-----------|-----------|
| B                                                                              | 2.652787  | -1.182279 | 1.144550  |
| B                                                                              | 1.295568  | -0.704573 | -0.417526 |
| B                                                                              | 3.124894  | 0.254606  | 0.078260  |
| N                                                                              | 1.473485  | -1.646867 | 0.693694  |
| N                                                                              | 2.150130  | 0.413475  | -0.835317 |
| N                                                                              | 3.732112  | -0.344413 | 1.145744  |
| C                                                                              | -0.128334 | -0.858197 | -1.253397 |
| C                                                                              | -1.088984 | -0.012858 | -0.546249 |
| H                                                                              | 0.003155  | -0.513751 | -2.284596 |
| N                                                                              | -1.854358 | -0.373882 | 0.513875  |
| N                                                                              | -1.298638 | 1.312041  | -0.747830 |
| C                                                                              | -2.557072 | 0.729014  | 0.973597  |
| C                                                                              | -1.831345 | -1.706186 | 1.123666  |
| C                                                                              | -2.209701 | 1.782922  | 0.184760  |
| C                                                                              | -0.571082 | 2.114246  | -1.735115 |
| H                                                                              | -3.227894 | 0.669887  | 1.819054  |
| H                                                                              | -0.781350 | -2.018761 | 1.233385  |
| H                                                                              | -2.308370 | -1.641498 | 2.105727  |
| H                                                                              | -2.384033 | -2.419420 | 0.499090  |
| H                                                                              | -2.519905 | 2.817952  | 0.211318  |
| H                                                                              | -0.950793 | 1.910626  | -2.744439 |
| H                                                                              | -0.725319 | 3.170720  | -1.498220 |
| H                                                                              | 0.498645  | 1.863166  | -1.664980 |
| H                                                                              | -0.455438 | -1.903258 | -1.247461 |

---

---

**Me<sub>3</sub>PCH<sub>2</sub>·B<sub>3</sub>N<sub>3</sub> C<sub>s</sub>**

---

|   |           |           |           |
|---|-----------|-----------|-----------|
| B | 2.555023  | -1.066334 | 0.000000  |
| B | 3.288014  | 0.629835  | 0.000000  |
| B | 1.161571  | 0.560121  | 0.000000  |
| N | 3.842854  | -0.623209 | 0.000000  |
| N | 2.269940  | 1.501911  | 0.000000  |
| N | 1.215147  | -0.921039 | 0.000000  |
| C | -0.340359 | 1.236981  | 0.000000  |
| P | -1.652955 | 0.022007  | 0.000000  |
| H | -0.464036 | 1.883086  | -0.884506 |
| C | -3.297320 | 0.815126  | 0.000000  |
| C | -1.562985 | -1.026458 | -1.473237 |
| C | -1.562985 | -1.026458 | 1.473237  |
| H | -4.090938 | 0.054726  | 0.000000  |
| H | -3.404527 | 1.446426  | -0.892944 |
| H | -3.404527 | 1.446426  | 0.892944  |
| H | -1.654350 | -0.403903 | -2.373863 |
| H | -2.366864 | -1.774777 | -1.459472 |
| H | -0.571265 | -1.502700 | -1.443829 |
| H | -1.654350 | -0.403903 | 2.373863  |
| H | -2.366864 | -1.774777 | 1.459472  |
| H | -0.571265 | -1.502700 | 1.443829  |
| H | -0.464036 | 1.883086  | 0.884506  |

---

Table S12: The M05-2X/cc-pVTZ Computed Complexation Energies<sup>(a)</sup> (in kcal/mol) for the Attachment of Different ImMe<sub>2</sub>·(BN)<sub>x</sub> Donors to the BH<sub>3</sub> and WCO<sub>5</sub> Acceptor Groups<sup>(b)</sup>

| Species                                                                           | $\Delta E_{LA}^{(b)}$ | $(\Delta E + ZPE)_{LA}^{(b)}$ | $\Delta G_{LA}^{\circ}{}^{(b)}$ |
|-----------------------------------------------------------------------------------|-----------------------|-------------------------------|---------------------------------|
| ImMe <sub>2</sub> ·BN·BH <sub>3</sub>                                             | -45.7                 | -42.7                         | -35.2                           |
| ImMe <sub>2</sub> ·BN·WCO <sub>5</sub>                                            | -59.0                 | -58.0                         | -46.6                           |
| ImMe <sub>2</sub> ·BNBN·BH <sub>3</sub>                                           | -51.9                 | -49.1                         | -41.5                           |
| ImMe <sub>2</sub> ·BNBN·WCO <sub>5</sub>                                          | -68.1                 | -67.1                         | -55.6                           |
| ImMe <sub>2</sub> ·B <sub>2</sub> N <sub>2</sub> ·BH <sub>3</sub>                 | -40.6                 | -36.8                         | -27.0                           |
| ImMe <sub>2</sub> ·B <sub>2</sub> N <sub>2</sub> ·WCO <sub>5</sub>                | -51.3                 | -49.9                         | -38.1                           |
| ImMe <sub>2</sub> ·B <sub>3</sub> N <sub>3</sub> ·BH <sub>3</sub> · <i>ortho</i>  | -34.8                 | -31.4                         | -21.3                           |
| ImMe <sub>2</sub> ·B <sub>3</sub> N <sub>3</sub> ·WCO <sub>5</sub> · <i>ortho</i> | -43.7                 | -42.8                         | -30.6                           |
| ImMe <sub>2</sub> ·B <sub>3</sub> N <sub>3</sub> ·BH <sub>3</sub> · <i>para</i>   | -21.7                 | -18.9                         | -10.7                           |
| ImMe <sub>2</sub> ·B <sub>3</sub> N <sub>3</sub> ·WCO <sub>5</sub> · <i>para</i>  | -35.3                 | -34.8                         | -26.2                           |

<sup>(a)</sup>See Table 2 for Definition of Each Term.

<sup>(b)</sup>For the Reaction: ImMe<sub>2</sub>·(BN)<sub>n</sub> + LA → ImMe<sub>2</sub>·(BN)<sub>n</sub>·LA (*n* = 1–3)



Figure S1: M05-2X/cc-pVTZ Optimized Structures of the Isolated Species in the Gas Phase.

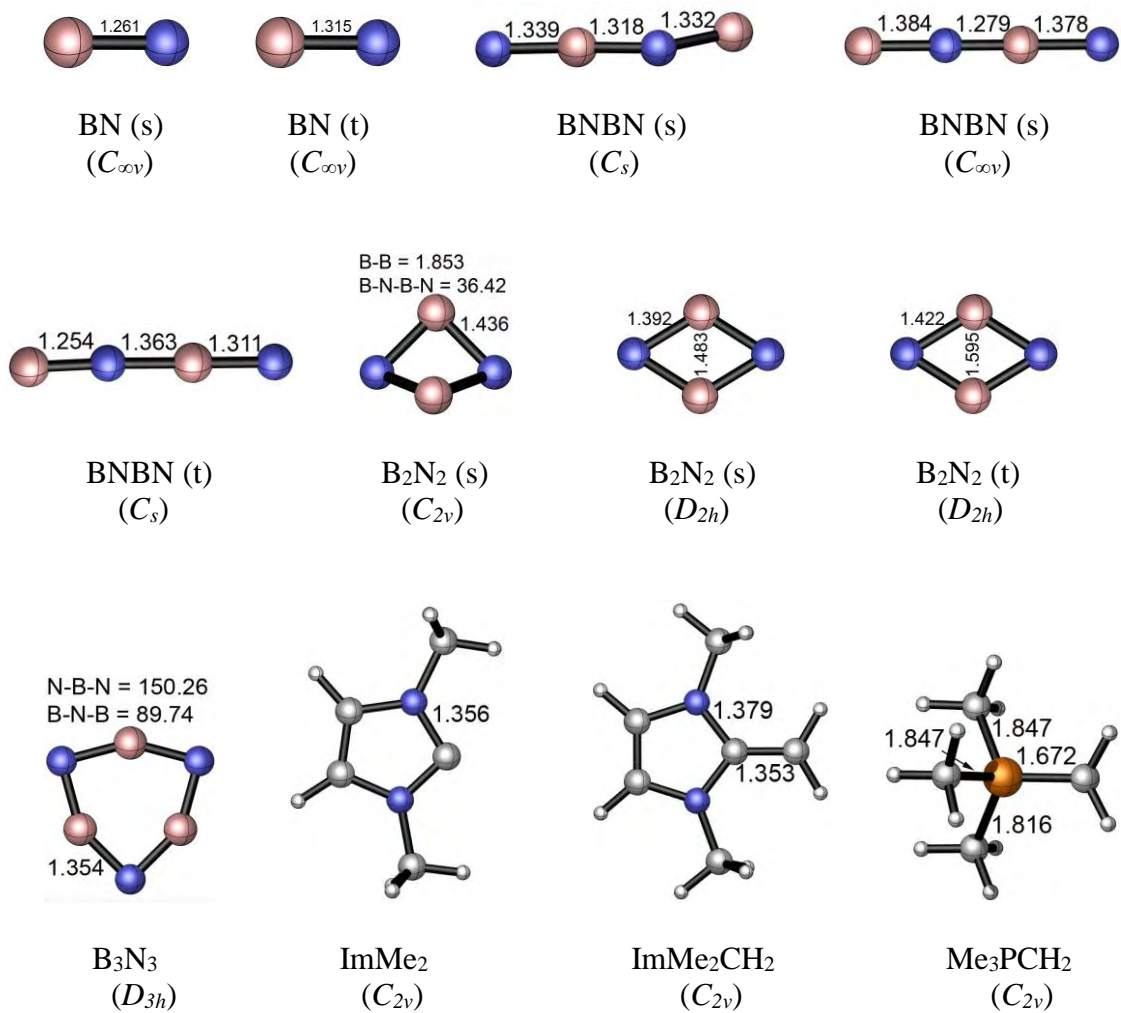

Figure S2: M05-2X/cc-pVTZ Calculated AIM Results, i.e.,  $\rho$  and  $H(r)$  (in Parenthesis), for All the Structures in This Study. Average Values of the  $\rho$  and  $H(r)$  Are Provided for Some of the Two and Three-base Substituted Complexes.

BN (s)

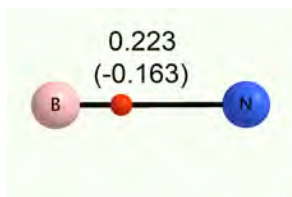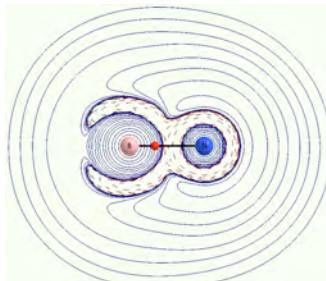

\*\*\*\*\*

BNBN (s)

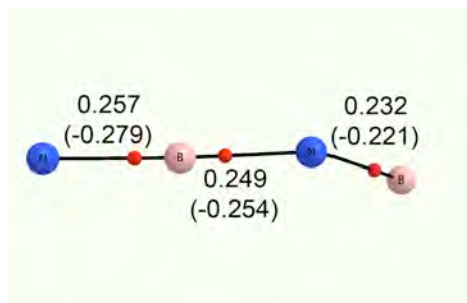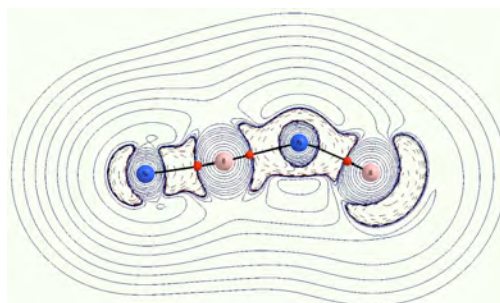

\*\*\*\*\*

B<sub>2</sub>N<sub>2</sub> (s)

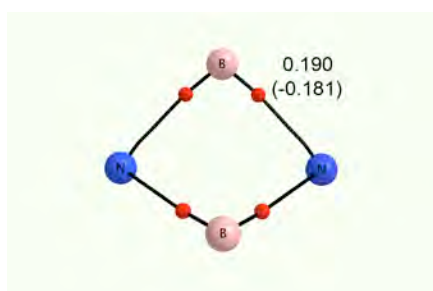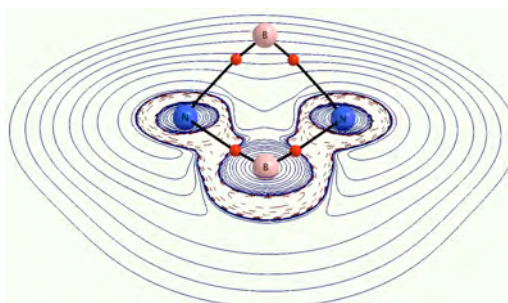

\*\*\*\*\*

B<sub>2</sub>N<sub>2</sub> (t)

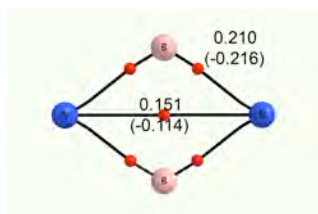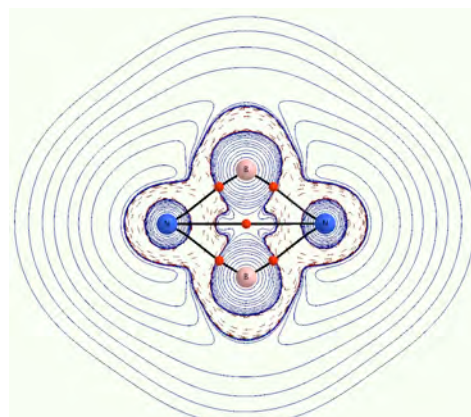

\*\*\*\*\*

$B_3N_3$  (s)

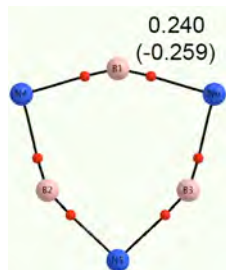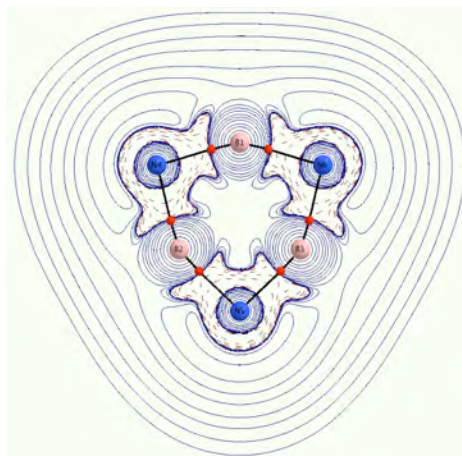

\*\*\*\*\*

$C_6H_6$

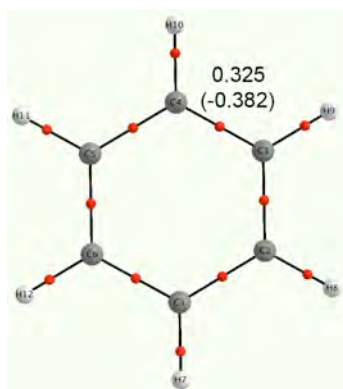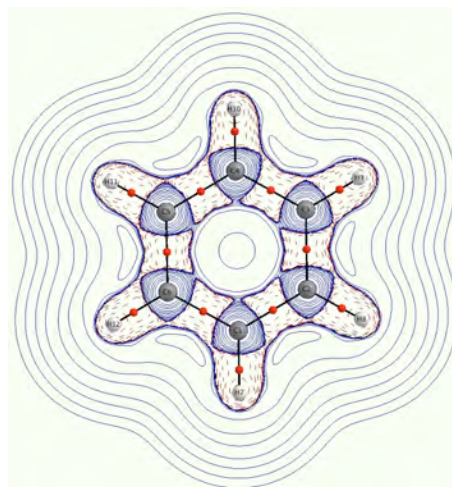

\*\*\*\*\*

$ImMe_2$

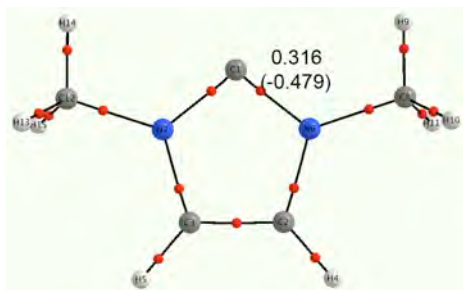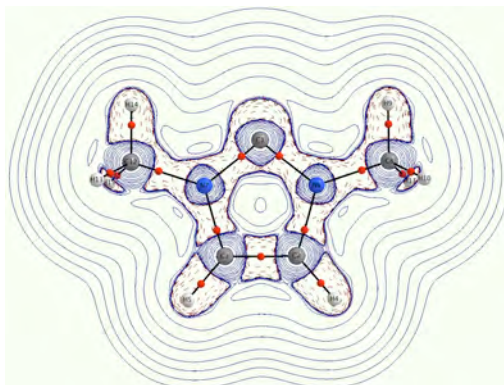

\*\*\*\*\*

ImMe<sub>2</sub>CH<sub>2</sub>

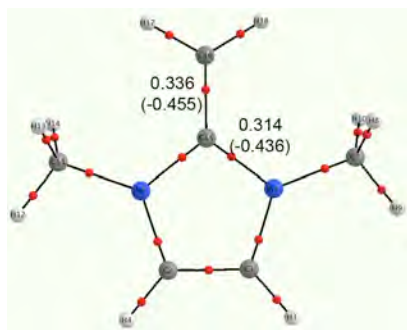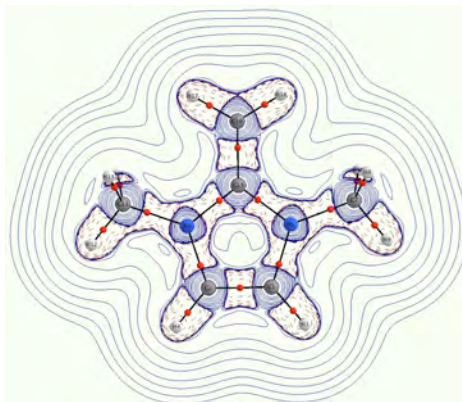

\*\*\*\*\*

Me<sub>3</sub>PCH<sub>2</sub>

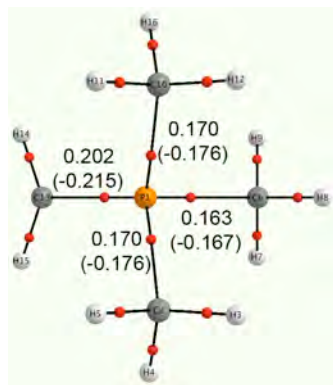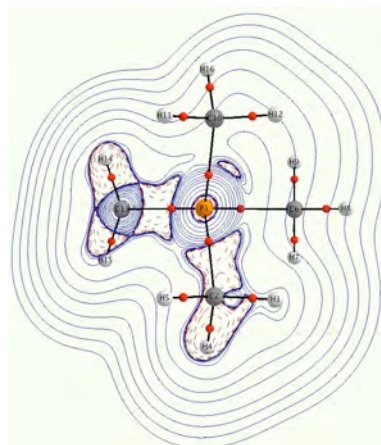

\*\*\*\*\*

ImMe<sub>2</sub>·BN

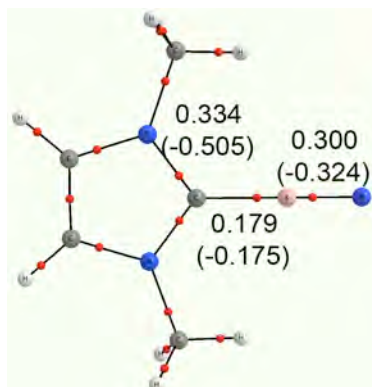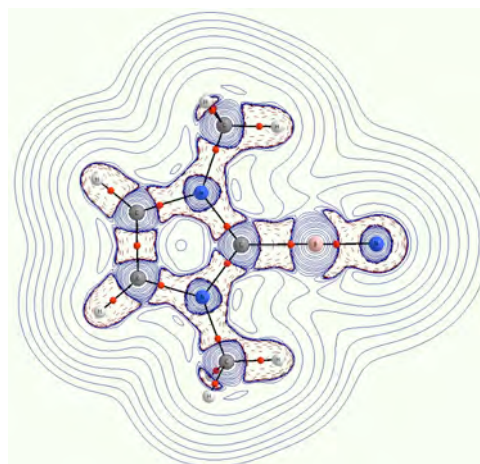

\*\*\*\*\*

ImMe<sub>2</sub>CH<sub>2</sub>·BN

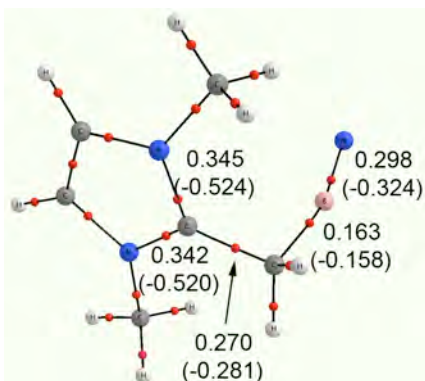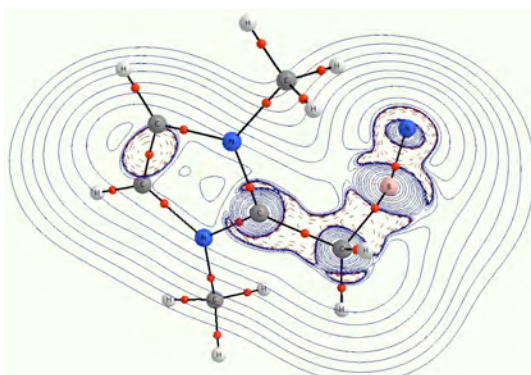

\*\*\*\*\*

Me<sub>3</sub>PCH<sub>2</sub>·BN

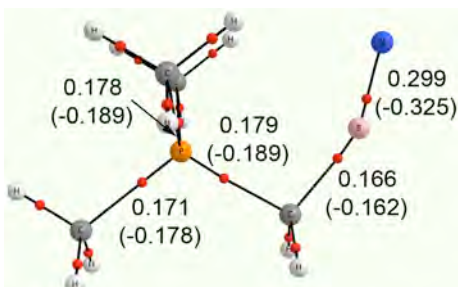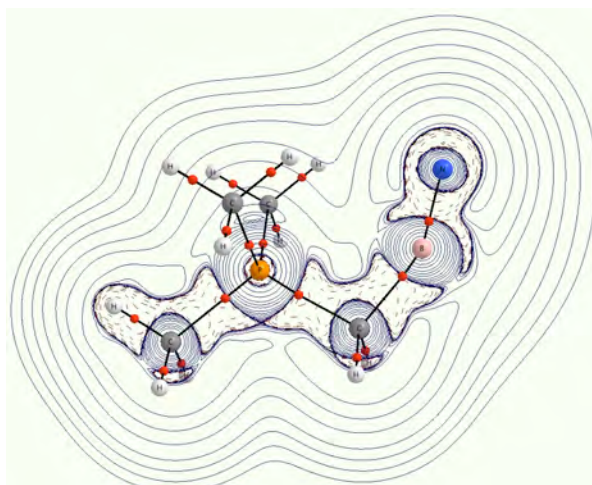

\*\*\*\*\*

ImMe<sub>2</sub>·BNBN

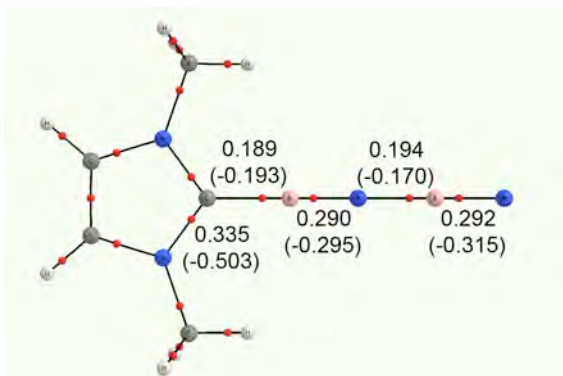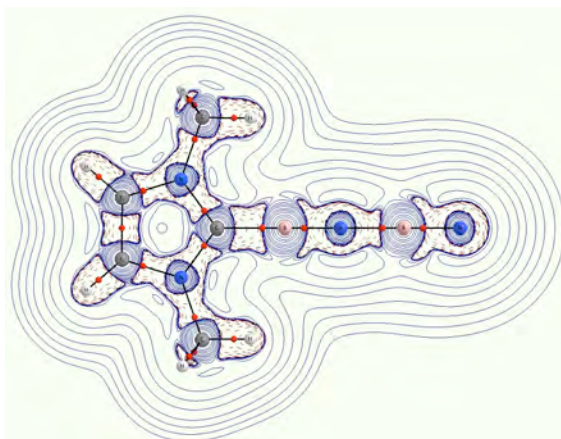

\*\*\*\*\*

ImMe<sub>2</sub>CH<sub>2</sub>·BNBN

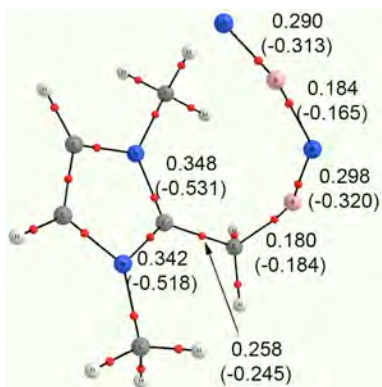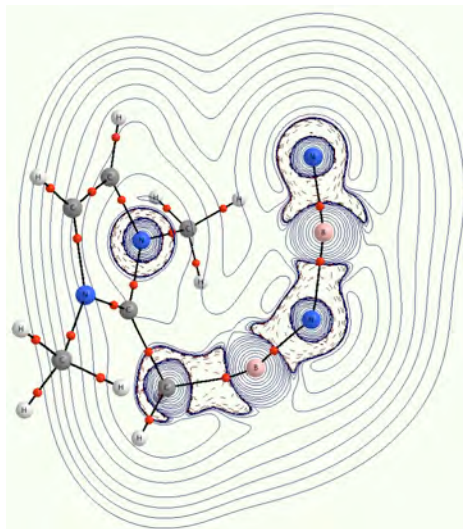

\*\*\*\*\*

Me<sub>3</sub>PCH<sub>2</sub>·BNBN

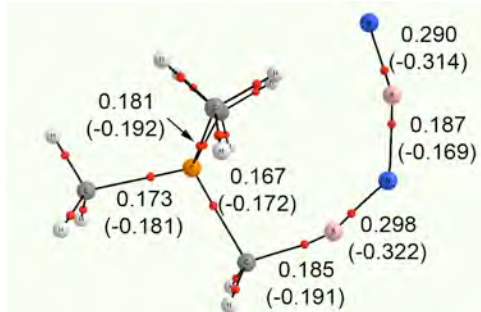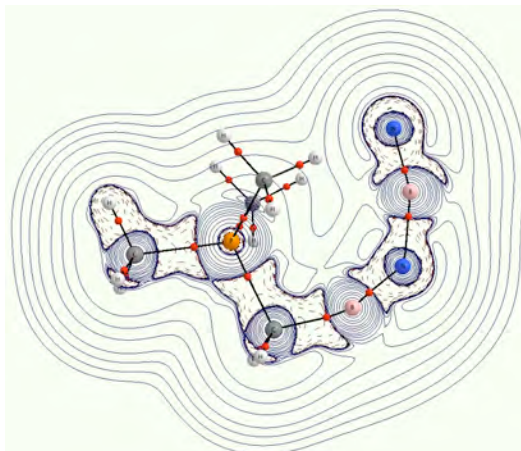

\*\*\*\*\*

$\text{ImMe}_2\cdot\text{B}_2\text{N}_2$

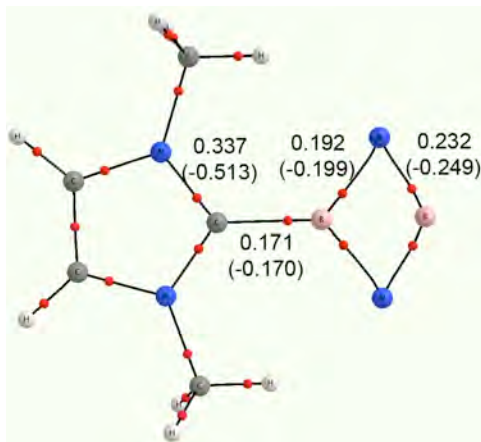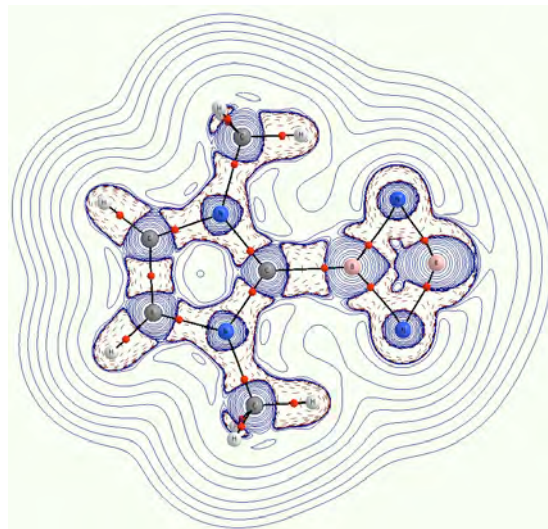

\*\*\*\*\*

$\text{ImMe}_2\text{CH}_2\cdot\text{B}_2\text{N}_2$

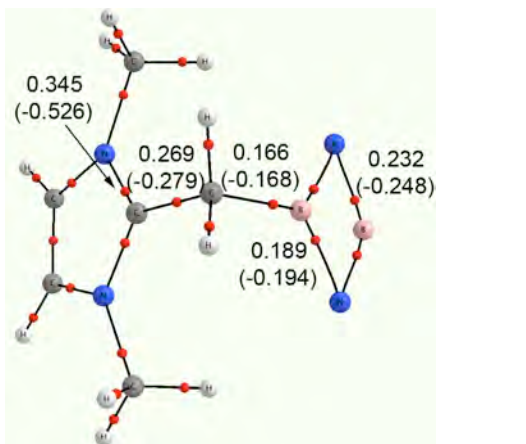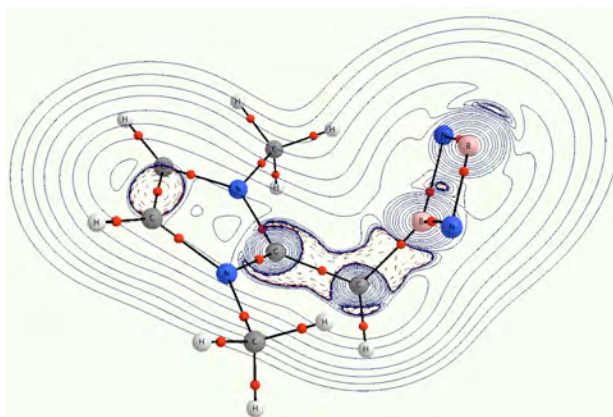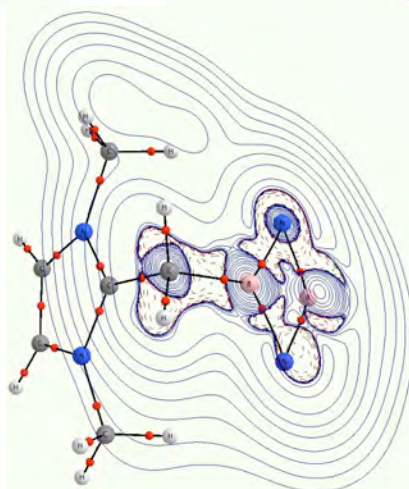

\*\*\*\*\*

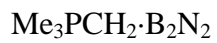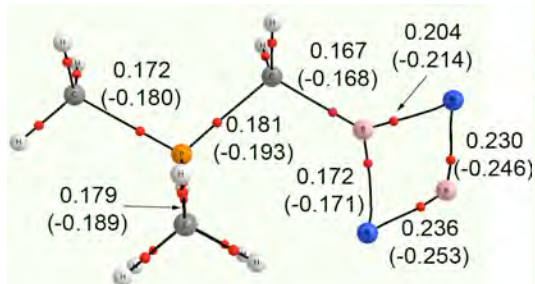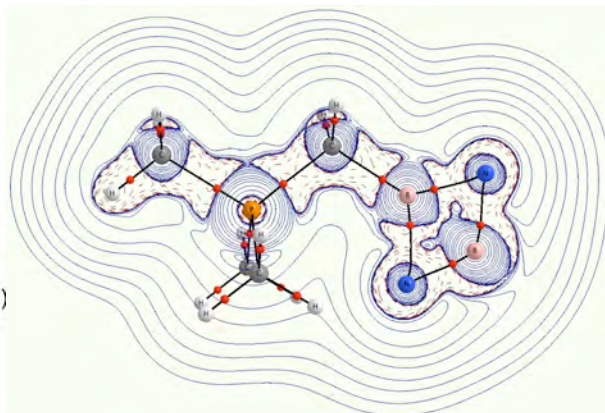

\*\*\*\*\*

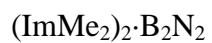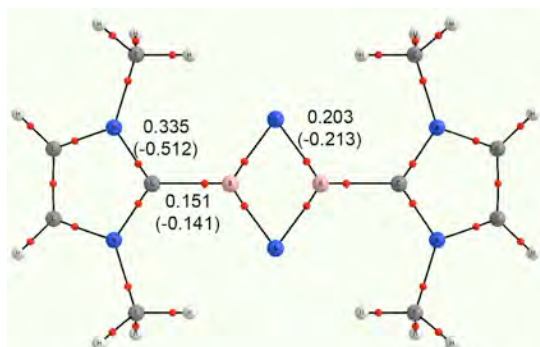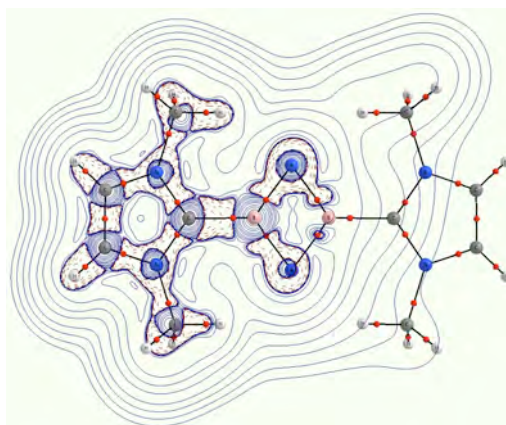

\*\*\*\*\*



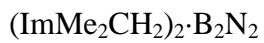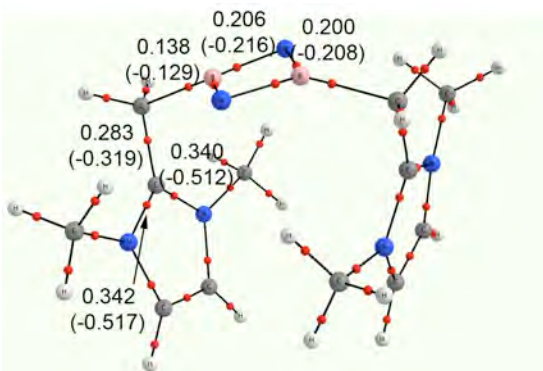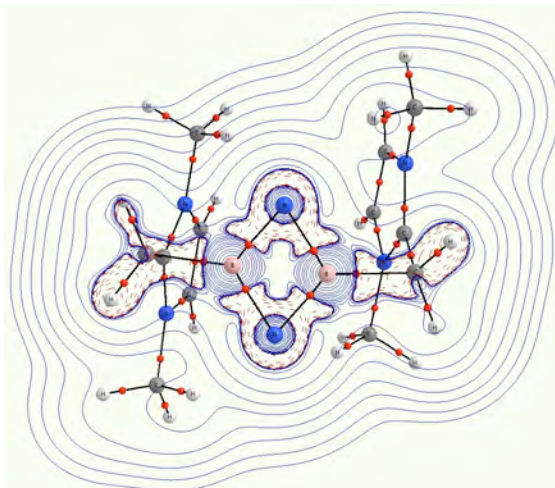

\*\*\*\*\*

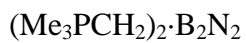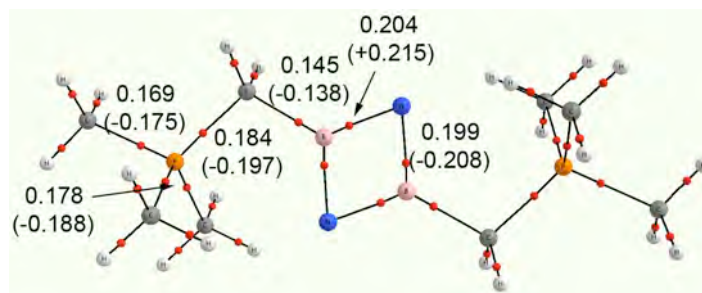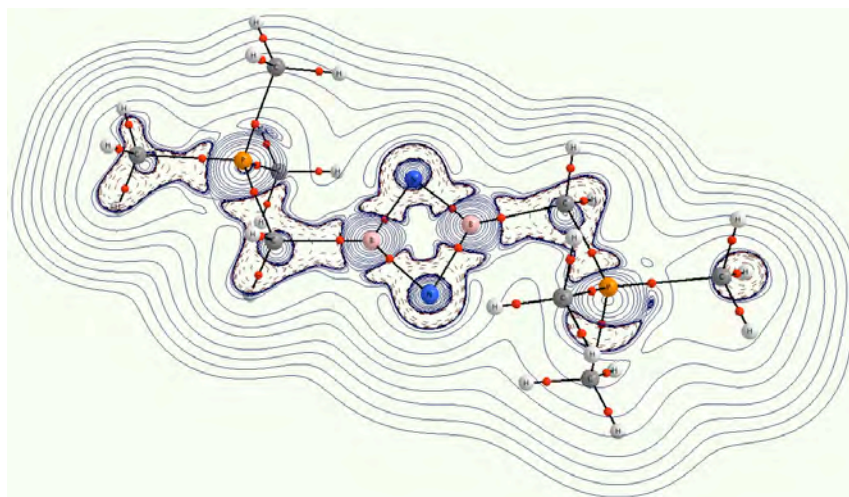

\*\*\*\*\*

$\text{ImMe}_2\cdot\text{B}_3\text{N}_3$

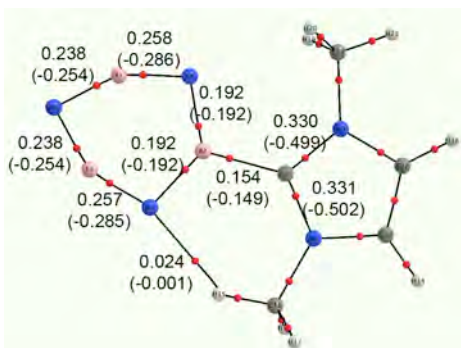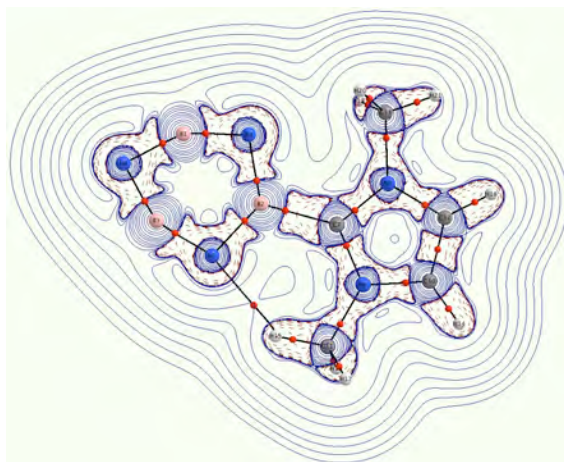

\*\*\*\*\*

$\text{ImMe}_2\text{CH}_2\cdot\text{B}_3\text{N}_3$

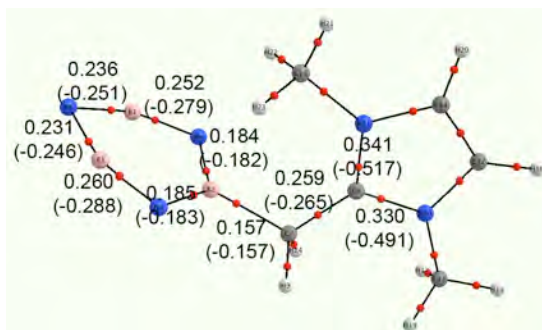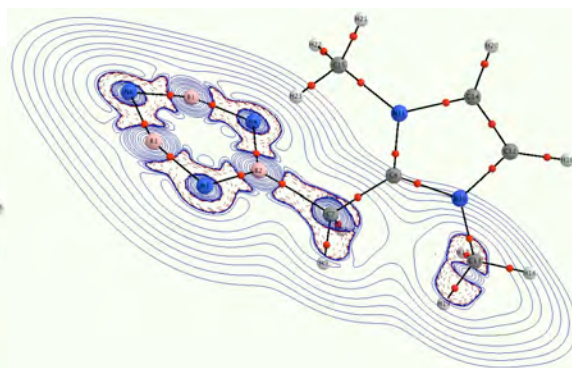

\*\*\*\*\*

$\text{Me}_3\text{PCH}_2\cdot\text{B}_3\text{N}_3$

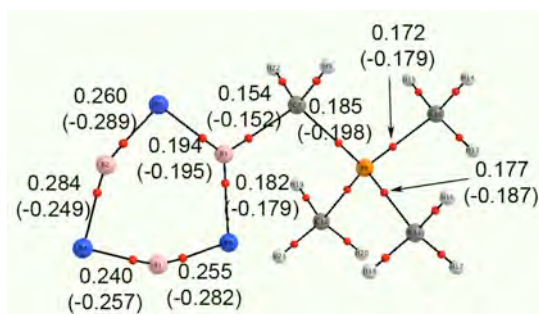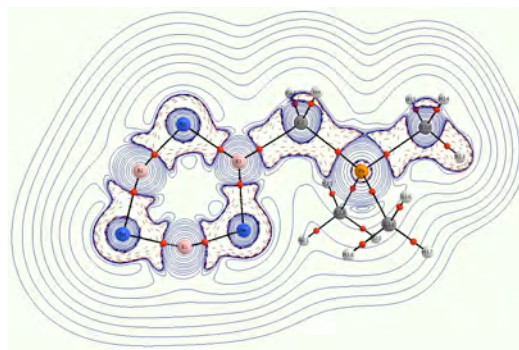

\*\*\*\*\*

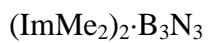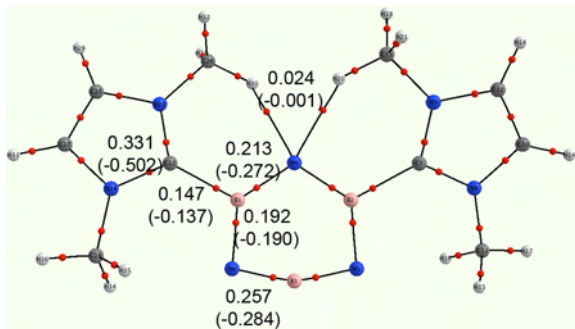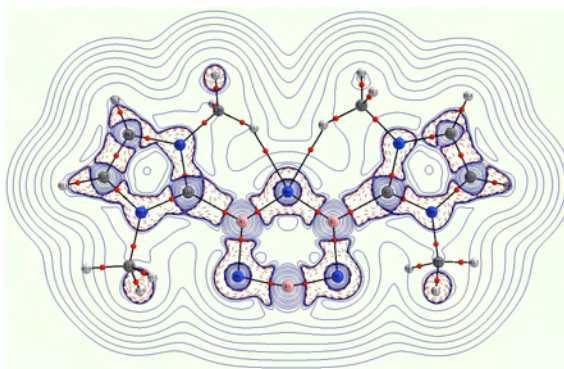

\*\*\*\*\*

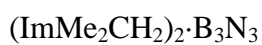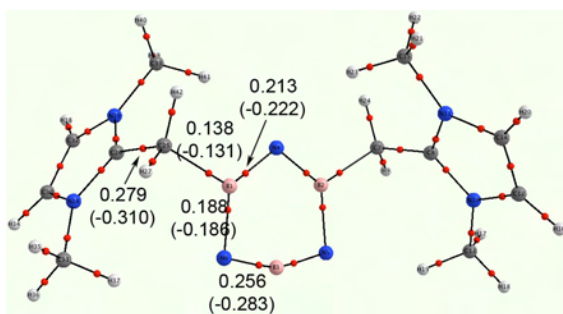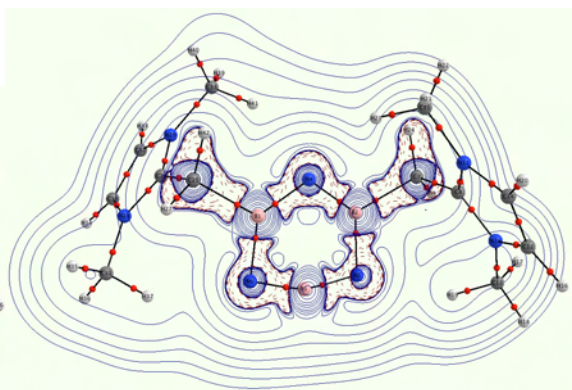

\*\*\*\*\*

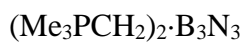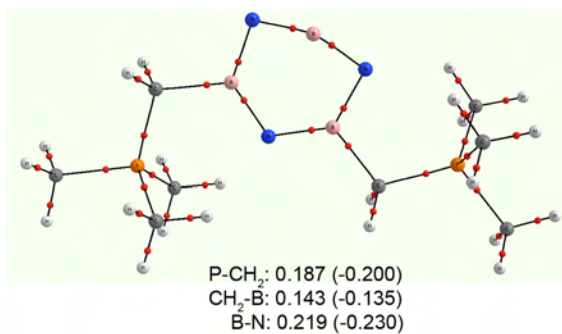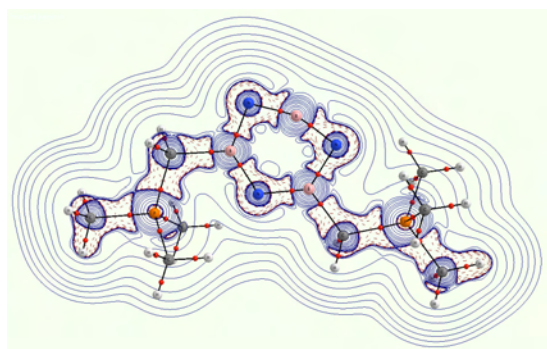

\*\*\*\*\*

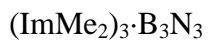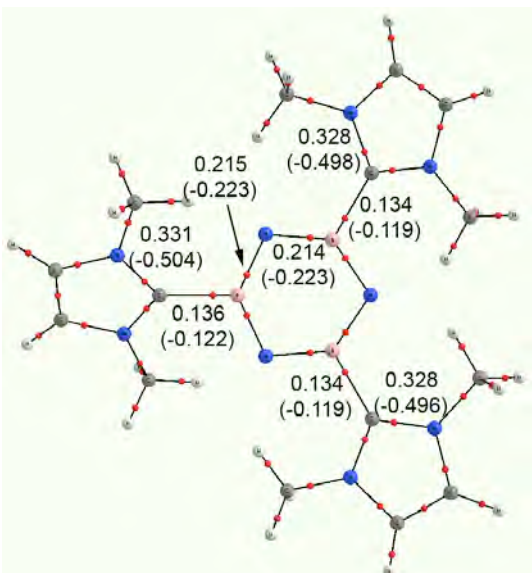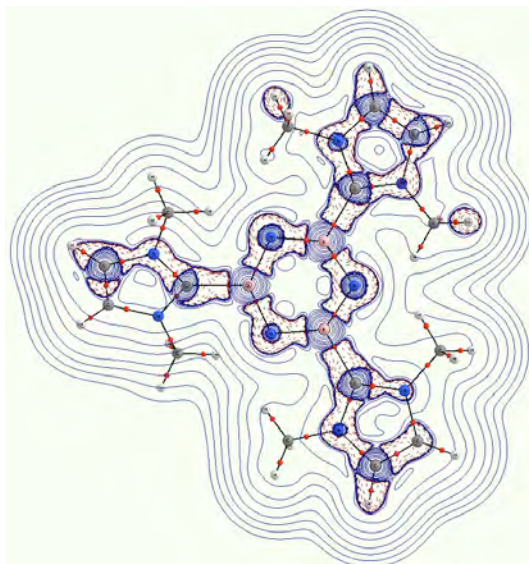

\*\*\*\*\*

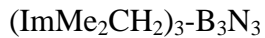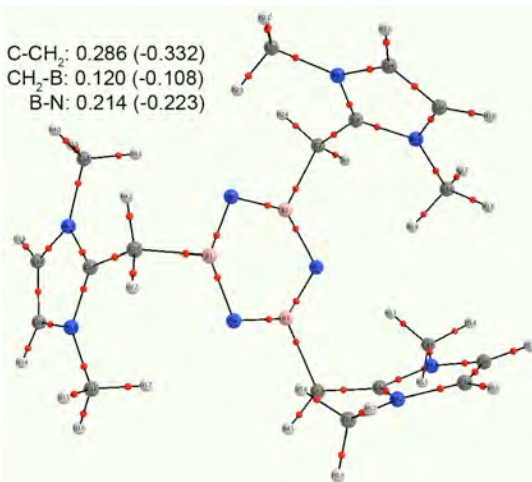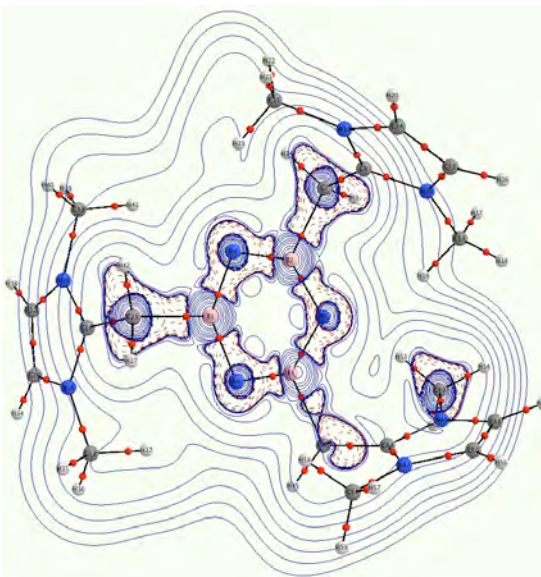

\*\*\*\*\*

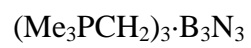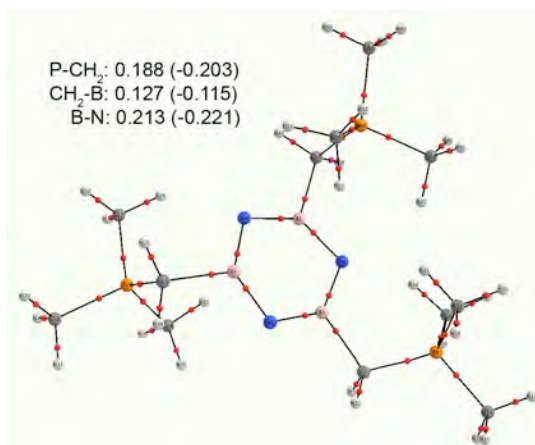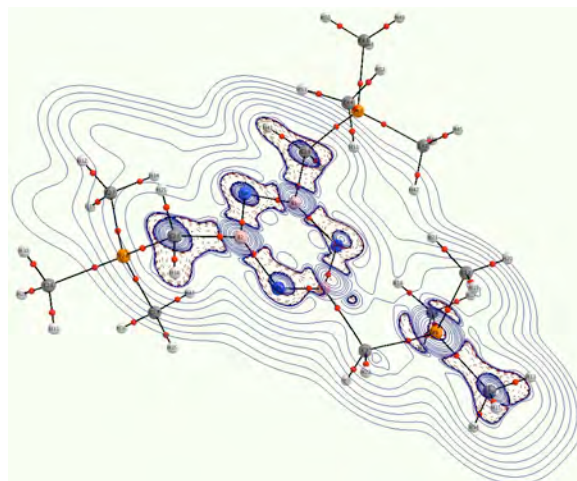

\*\*\*\*\*

Figure S3: Highest Occupied (HOMO) and Lowest Unoccupied (LUMO) Molecular Orbitals of All the Studied Structures (Isovalue = 0.02) Computed at the M05-2X/cc-pVTZ Level of Theory. Energies (in eV) Are Also Given in Parentheses.

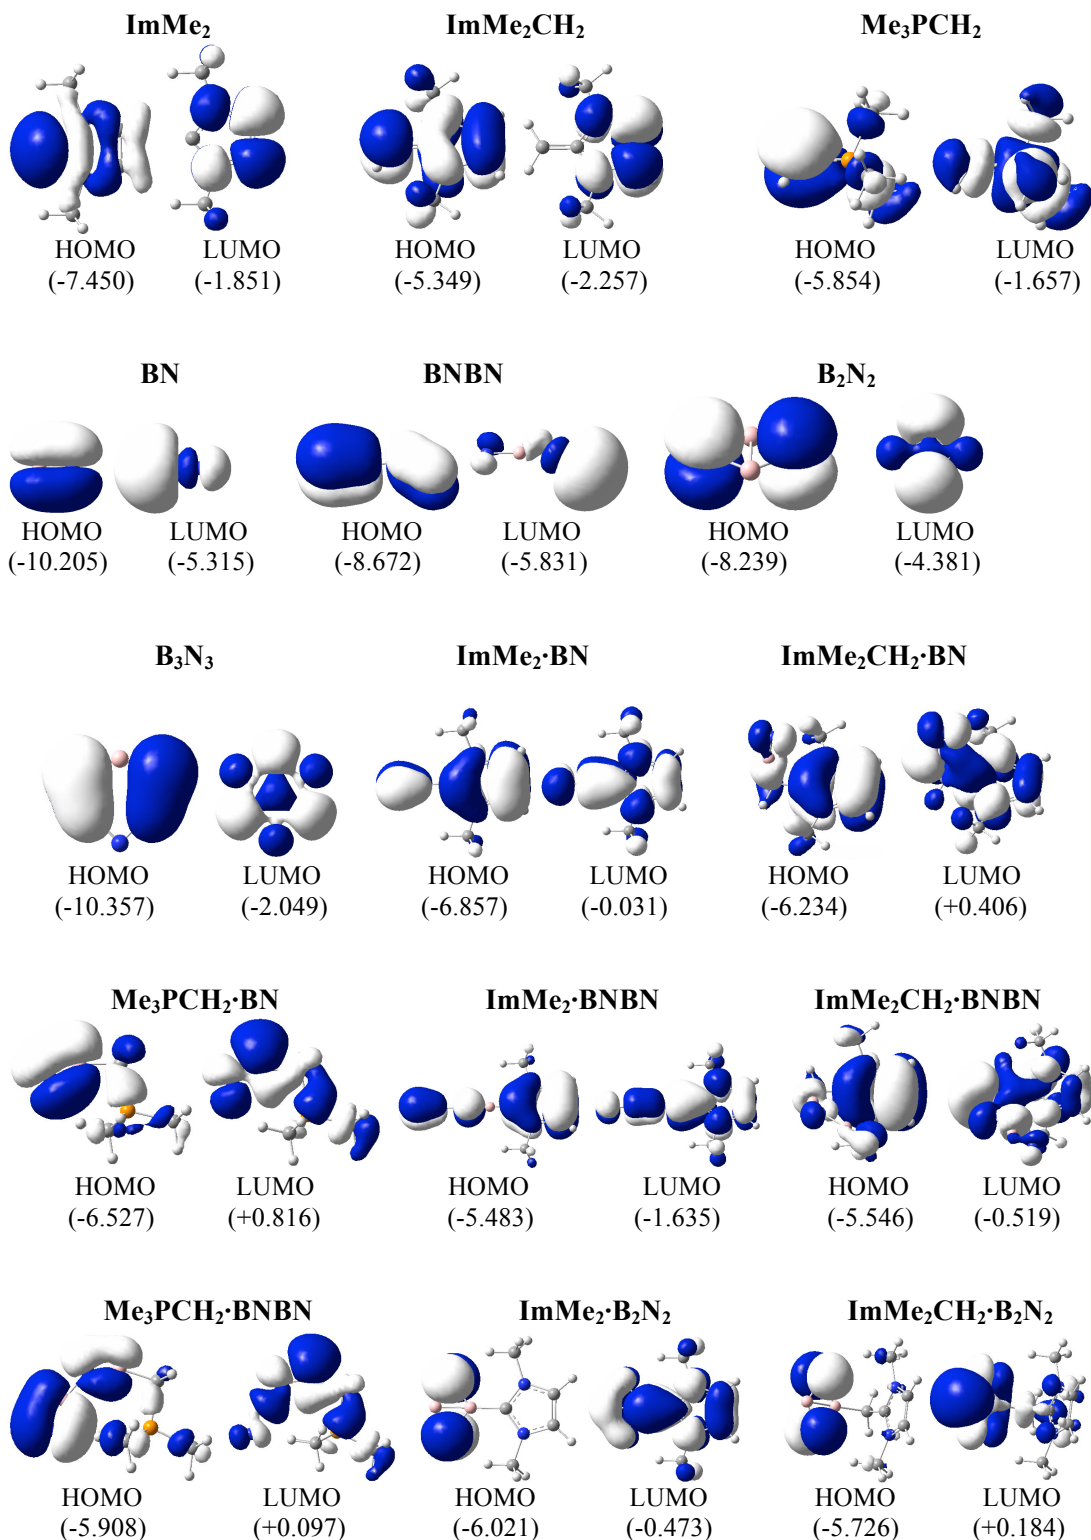

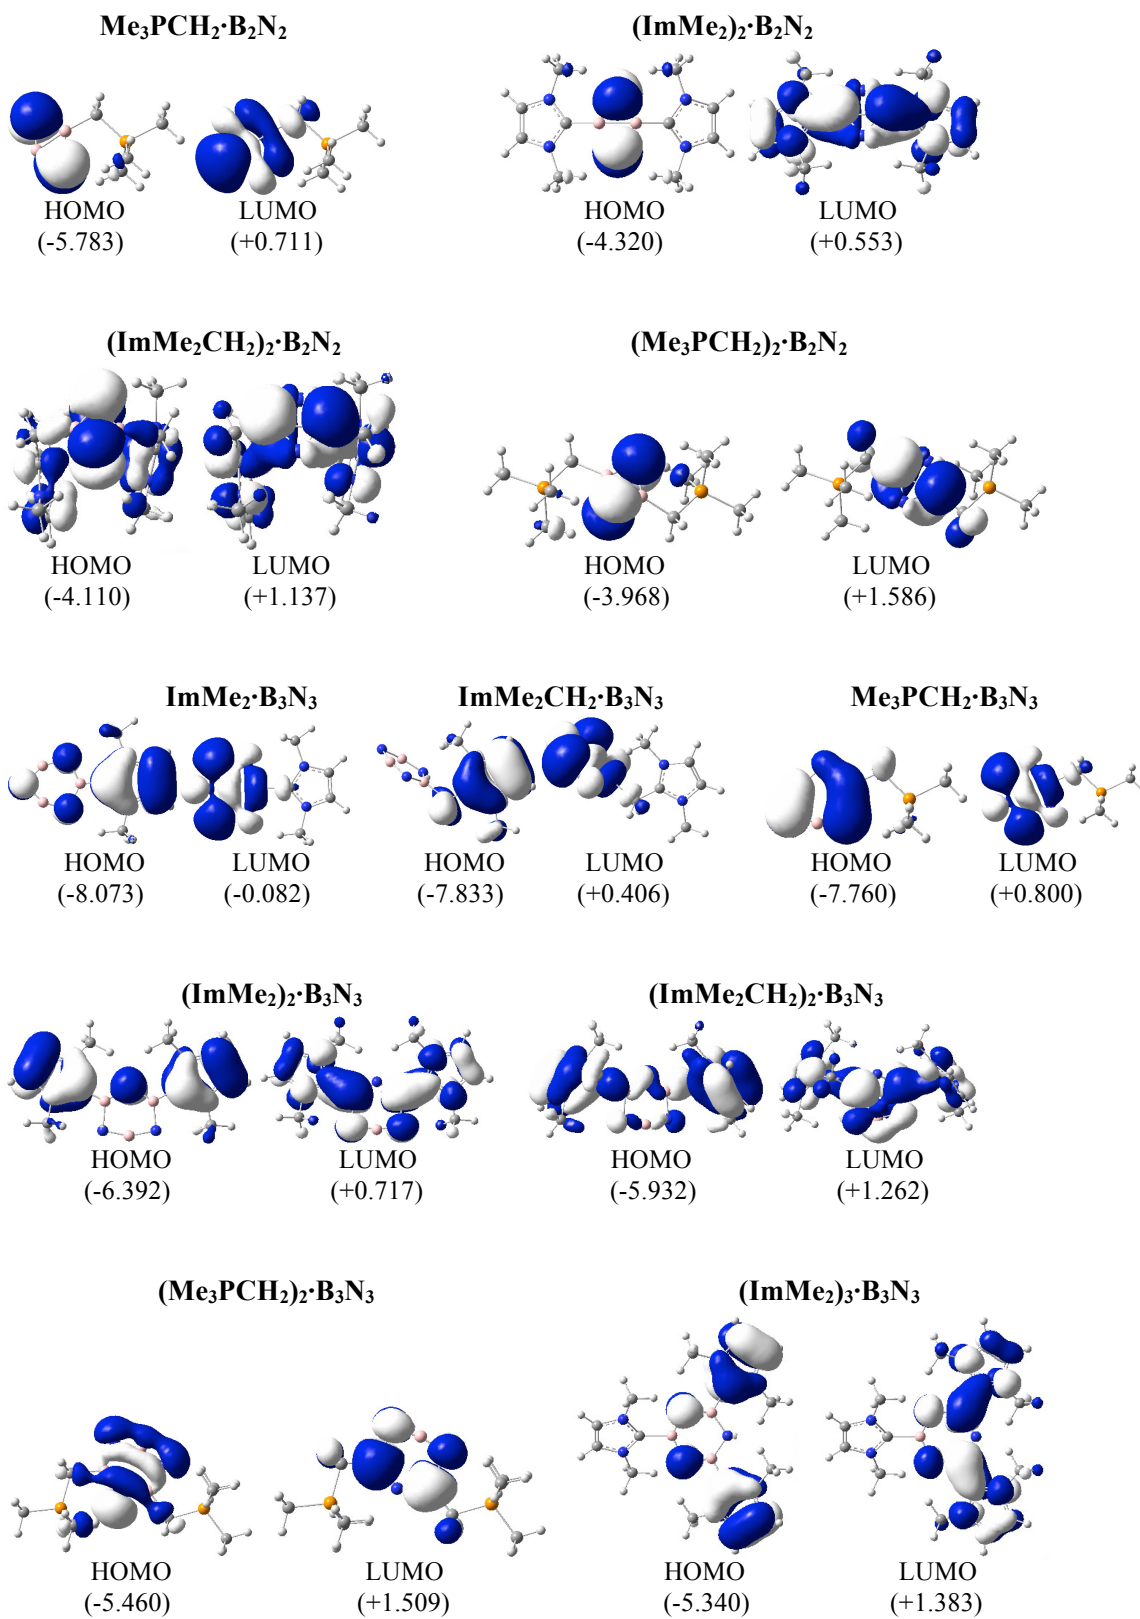

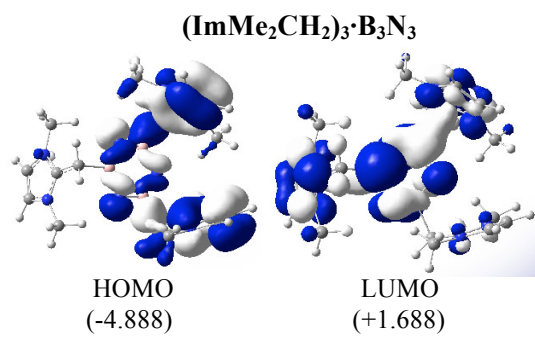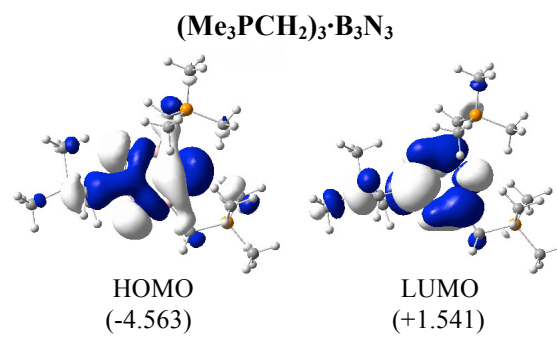



---

## References

- (1) Martin, J. M. L. *Mol. Phys.* **2014**, *112*, 785–793.
- (2) Karton, A.; Martin, J. M. L. *J. Chem. Phys.* **2006**, *125*, 144313.
- (3) Martin, J. M. L.; Lee, T. J.; Scuseria, G. E.; Taylor, P. R. *J. Chem. Phys.* **1992**, *97*, 6549–6556.
- (4) Asmis, K. R.; Taylor, T. R.; Neumark, D. M. *Chem. Phys. Lett.* **1998**, *295*, 75 – 81.
- (5) Lorenz, M.; Agreiter, J.; Smith, A. M.; Bondybey, V. E. *J. Chem. Phys.* **1996**, *104*, 3143–3146.
- (6) Xu, H.; Pittman Jr., C. U.; Saebø, S. *Struc. Chem.* **2013**, *24*, 1383–1393.
- (7) Cui, W.; Wang, C.; Shao, J.; Zhu, X. *Int. J. Quant. Chem.* **2013**, *113*, 2251–2260.
- (8) Sutjianto, A.; Pandey, R.; Manuel Recio, J. *Int. J. Quant. Chem.* **1994**, *52*, 199–210.
- (9) Martin, J. M. L.; El-Yazal, J.; François, J.-P. *Chem. Phys. Lett.* **1996**, *248*, 95 – 101.
- (10) Martin, J. M. L.; François, J.-P.; Gijbels, R. *Chem. Phys. Lett.* **1992**, *193*, 243 – 250.
- (11) Martin, J. M. L.; El-Yazal, J.; François, J.-P.; Gijbels, R. *Chem. Phys. Lett.* **1995**, *232*, 289 – 294.
